# Supplementary material
Source: publisher figshare collection journal article supplement (https://acs.figshare.com/ndownloader/files/4423561)

# Brønsted Acid-Mediated Nazarov Cyclization of Vinyl Allenes

Yen-Ku Wu and F. G. West\*

*Department of Chemistry, University of Alberta, E3-43 Gunning-Lemieux  
Chemistry Centre, Edmonton, AB, Canada T6G 2G2*

*frederick.west@ualberta.ca*

**Supporting Information:** Experimental procedures, characterization data for all compounds and synthetic intermediates.

## Contents:

|                                                            |                   |
|------------------------------------------------------------|-------------------|
| <b>Experimental Procedures.....</b>                        | <b>S-1–S-18</b>   |
| <b>General Information.....</b>                            | <b>S-1</b>        |
| <b>Acetylide Adducts 1a-l.....</b>                         | <b>S-2–S-6</b>    |
| <b>TES Ethers 2a-l.....</b>                                | <b>S-6–S-11</b>   |
| <b>Rearrangement Products 4, 5 and 9.....</b>              | <b>S-11–S-17</b>  |
| <b>Stereochemical Assignment via Nitrobenzoate 11.....</b> | <b>S-17–S-18</b>  |
| <b><sup>1</sup>H and <sup>13</sup>C NMR Spectra.....</b>   | <b>S-19–S-108</b> |

**General Information.** Reactions were carried out in flame-dried glassware under a positive argon atmosphere unless otherwise stated. Transfer of anhydrous solvents and reagents was accomplished with oven-dried syringes or cannulae. Solvents were distilled before use: methylene chloride from calcium hydride, tetrahydrofuran, diethylether and benzene from sodium/benzophenone ketyl, toluene from sodium metal. All other solvents and commercially available reagents were either purified by standard procedures or used without further purification. Thin layer chromatography was performed on glass plates precoated with 0.25 mm silica gel; the stains for TLC analysis were conducted with 2.5 % *p*-anisaldehyde in AcOH-H<sub>2</sub>SO<sub>4</sub>-EtOH (1:3:85) and further heating until development of color. Flash chromatography was performed on 230-400 mesh silica gel with the indicated eluents. Nuclear magnetic resonance (NMR) spectra were recorded in indicated deturated solvents and are reported in ppm in the presence of TMS as internal standard and coupling constants (*J*) are reported in Hertz (Hz). Infrared (IR) spectra were recorded neat and reported in cm<sup>-1</sup>. Mass spectra were recorded by using EI or ESI as specified in each case.

**(E)-2-Methyl-1,5-diphenylpent-1-en-4-yn-3-ol (1a).**

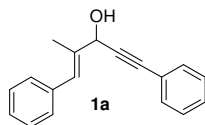

To a flame-dried round bottom flask containing a magnetic stirring bar was added phenylacetylene (3.98 mmol, 406 mg) and ether (8 mL) under Ar. The temperature of the solution was dropped to -78 °C. *n*-BuLi (1.60 M solution in hexane, 3.98 mmol, 2.48 mL) was added dropwise and the reaction mixture was stirred at the same temperature for 30 min. The  $\alpha$ -methyl-*trans*-cinnamaldehyde (3.98 mmol, 581 mg) was added and the resulting solution was allowed to warm to room temperature. The reaction was quenched with saturated aqueous NH<sub>4</sub>Cl and diluted with ether. The separated organic layer was washed with brine, dried over anhydrous MgSO<sub>4</sub>, filtered and concentrated to provide pure compound **1a** (850 mg, yield 86%): *R*<sub>f</sub> 0.28 (hexane:EtOAc 4:1); IR (film) 3341 (br), 3081, 3056, 3024, 2981, 2917, 2859, 2201, 1664, 1598, 1573, 1489, 1442, 1381, 1361, 1281, 1070, 1008, 998, 756, 691 cm<sup>-1</sup>; <sup>1</sup>H NMR (400 MHz, CDCl<sub>3</sub>)  $\delta$  7.52-7.50 (m, 2H), 7.39-7.30 (m, 7H), 7.29-7.27 (m, 1H), 6.81 (s, 1H), 5.20 (s, 1H), 2.31 (br s, 1H), 2.11 (d, *J* = 1.2 Hz, 3H); <sup>13</sup>C NMR (100 MHz, CDCl<sub>3</sub>)  $\delta$  137.0, 136.7, 131.7, 129.0, 128.5, 128.2, 128.1, 127.2, 126.7, 122.4, 88.0, 86.3, 68.7, 14.1; HRMS (EI, M<sup>+</sup>) for C<sub>18</sub>H<sub>16</sub>O calcd 248.1201, found: *m/z* 248.1196.

**(E)-2-Methyl-1-phenylundec-1-en-4-yn-3-ol (1b).**

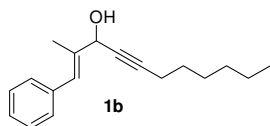

Synthesized according to the previous procedure using  $\alpha$ -methyl-*trans*-cinnamaldehyde (5.61 mmol, 819 mg), 1-octyne (5.61 mmol, 619 mg), and *n*-BuLi (5.61 mmol, 3.50 mL) to afford **1b** (1.187g, yield 83%) as a pale yellow oil: *R*<sub>f</sub> 0.50 (hexane:EtOAc 4:1); IR (film) 3354 (br), 3082, 3057, 3025, 2955, 2930, 2858, 2274, 2223, 1682, 1621, 1600, 1492, 1446, 1378, 1304, 1131, 1011, 751, 699 cm<sup>-1</sup>; <sup>1</sup>H NMR (400 MHz, CDCl<sub>3</sub>)  $\delta$  7.36-7.27 (m, 4H), 7.25-7.21 (m, 1H), 6.68 (s, 1H), 4.91 (s, 1H), 2.26 (td, *J* = 7.2, 2.0 Hz, 2H), 1.99 (d, *J* = 1.6 Hz, 3H), 1.92 (br s, 1H), 1.57-1.50 (m, 2H), 1.44-1.36 (m, 2H), 1.34-1.24 (m, 4H), 0.89 (m, 3H); <sup>13</sup>C NMR (100 MHz, CDCl<sub>3</sub>)  $\delta$  137.6, 137.5, 129.2, 128.3, 126.9, 126.9, 87.6, 79.4, 68.8, 31.5, 28.8, 22.7, 19.0, 14.2 [Two aliphatic carbon signals are missing due to peak overlap.]; HRMS (EI, M<sup>+</sup>) for C<sub>18</sub>H<sub>24</sub>O calcd 256.1827, found: *m/z* 256.1826.

**(E)-2,6-Dimethyl-1-phenylhepta-1,6-dien-4-yn-3-ol (1c).**

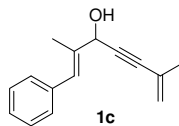

Synthesized according to the previous procedure using  $\alpha$ -methyl-*trans*-cinnamaldehyde (4.12 mmol, 601 mg), 2-methylbut-1-en-3-yne (4.12 mmol, 272 mg), and *n*-BuLi (4.12 mmol, 2.57 mL) to afford

**1c** (786 mg, yield 90%) as a pale yellow oil:  $R_f$  0.61 (hexane: EtOAc 4:1); IR (film) 3372 (br), 3057, 3025, 2952, 2921, 2856, 2199, 1615, 1446, 1373, 1291, 1073, 1010, 899, 753, 699  $\text{cm}^{-1}$ ;  $^1\text{H}$  NMR (400 MHz,  $\text{CDCl}_3$ )  $\delta$  7.36-7.29 (m, 4H), 7.25-7.19 (m, 1H), 6.70 (s, 1H), 5.34 (m, 1H), 5.27 (app. quintet,  $J = 1.6$  Hz, 1H), 5.04 (s, 1H), 2.01 (d,  $J = 1.2$  Hz, 3H), 1.95 (br s, 1H), 1.94 (dd,  $J = 1.4, 1.0$  Hz, 3H);  $^{13}\text{C}$  NMR (100 MHz,  $\text{CDCl}_3$ )  $\delta$  137.3, 137.0, 129.2, 128.3, 127.4, 127.0, 126.4, 122.8, 87.8, 87.2, 68.9, 23.5, 14.3. HRMS (EI,  $\text{M}^+$ ) for  $\text{C}_{15}\text{H}_{16}\text{O}$  calcd 212.1201, found:  $m/z$  212.1193.

**(*E*)-4-Methyl-1-phenylhex-4-en-1-yn-3-ol (1d).**

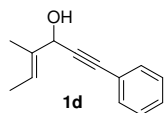

Synthesized according to the previous procedure using (*E*)-2-methylbut-2-enal (2.69 mmol, 226 mg), phenylacetylene (2.69 mmol, 275 mg), and *n*-BuLi (2.69 mmol, 1.68 mL) to afford **1d** (455 mg, yield 91%) as a pale yellow oil:  $R_f$  0.44 (hexane:EtOAc 4:1); IR (microscope) 3353 (br), 3080, 3057, 3033, 2978, 2919, 2860, 2198, 1673, 1598, 1489, 1443, 1380, 1069, 1006, 996, 756, 691  $\text{cm}^{-1}$ ;  $^1\text{H}$  NMR (400 MHz,  $\text{CDCl}_3$ )  $\delta$  7.49-7.45 (m, 2H), 7.34-7.30 (m, 3H), 5.79 (qq,  $J = 6.6, 0.8$  Hz, 1H), 5.01 (s, 1H), 2.56 (br s, 1H), 1.85 (d,  $J = 1.2$  Hz, 3H), 1.70 (d,  $J = 6.6$  Hz, 3H);  $^{13}\text{C}$  NMR (100 MHz,  $\text{CDCl}_3$ )  $\delta$  135.3, 131.9, 128.6, 128.5, 122.9, 122.9, 88.9, 86.1, 68.7, 13.5, 12.3; HRMS (EI,  $\text{M}^+$ ) for  $\text{C}_{13}\text{H}_{14}\text{O}$  calcd 186.1045, found:  $m/z$  186.1045.

**(*E*)-3-Methyldodec-2-en-5-yn-4-ol (1e).**

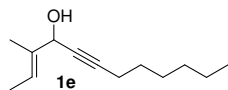

Synthesized according to the previous procedure using (*E*)-2-methylbut-2-enal (4.29 mmol, 360 mg), 1-octyne (4.29 mmol, 473 mg), and *n*-BuLi (4.29 mmol, 2.68 mL) to afford **1e** (779 mg, 94%) as a pale yellow oil:  $R_f$  0.56 (hexane: EtOAc 4:1); IR (microscope) 3347 (br), 2956, 2930, 2859, 2229, 1674, 1456, 1379, 1135, 995  $\text{cm}^{-1}$ ;  $^1\text{H}$  NMR (400 MHz,  $\text{CDCl}_3$ )  $\delta$  5.68 (qq,  $J = 6.8, 1.2$  Hz, 1H), 4.73 (br s, 1H), 2.25 (td,  $J = 7.2, 2.0$  Hz, 2H), 1.74 (app t,  $J = 1.2$  Hz, 3H), 1.72 (br s, 1H), 1.64 (d,  $J = 6.8$  Hz, 3H), 1.54-1.47 (m, 2H), 1.41-1.25 (m, 6H), 0.88 (t,  $J = 7.0$  Hz, 3H);  $^{13}\text{C}$  NMR (100 MHz,  $\text{CDCl}_3$ )  $\delta$  135.5, 122.1, 86.8, 79.5, 68.3, 31.3, 28.5, 28.5, 22.5, 18.7, 14.0, 13.2, 11.8; HRMS (EI,  $\text{M}^+$ ) for  $\text{C}_{13}\text{H}_{22}\text{O}$  calcd 194.1671, found:  $m/z$  194.1672.

**(4*E*)-1-cyclohexenyl-4-methylhex-4-en-1-yn-3-ol (1f).**

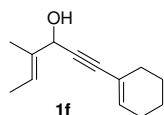

Synthesized according to the previous procedure using (*E*)-2-methylbut-2-enal (4.31 mmol, 362 mg),

1-ethynylcyclohex-1-ene (4.31 mmol, 458 mg), and *n*-BuLi (4.31 mmol, 2.69 mL) to afford **1f** (778 mg, yield 95%) as a pale yellow oil: *R*<sub>f</sub> 0.60 (hexane:EtOAc 4:1); IR (microscope) 3356 (br), 3027, 2930, 2859, 2218, 2184, 1670, 1631, 1436, 1379, 1199, 1003, 918, 841 cm<sup>-1</sup>; <sup>1</sup>H NMR (400 MHz, CDCl<sub>3</sub>) δ 6.12 (app. quintet, *J* = 2.0 Hz, 1H), 5.69 (qqd, *J* = 6.8, 1.2, 1.2 Hz, 1H), 4.85 (s, 1H), 2.13-2.06 (m, 4H), 1.75 (app t, *J* = 1.0 Hz, 3H), 1.64 (d, *J* = 7.2 Hz, 3H), 1.61-1.54 (m, 4H) [OH peak is not observed.]; <sup>13</sup>C NMR (100 MHz, CDCl<sub>3</sub>) δ 135.3, 135.2, 122.4, 120.1, 87.8, 85.7, 68.5, 29.1, 25.6, 22.2, 21.4, 13.2, 11.9; HRMS (EI, M<sup>+</sup>) for C<sub>13</sub>H<sub>18</sub>O calcd 190.1358, found: *m/z* 190.1354.

**(*E*)-4-Methyl-1,7-diphenylhept-4-en-1-yn-3-ol (1g).**

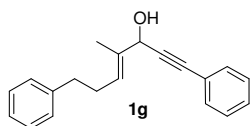

Synthesized according to the previous procedure using (*E*)-2-methyl-5-phenylpent-2-enal (3.18 mmol, 554 mg), phenylacetylene (3.18 mmol, 324 mg), and *n*-BuLi (3.18 mmol, 1.98 mL) to afford **1g** (792 mg, yield 91%) as a pale yellow oil: *R*<sub>f</sub> 0.55 (hexane:EtOAc 4:1); IR (film) 3370 (br), 3083, 3061, 3026, 2925, 2857, 2225, 2203, 1671, 1599, 1489, 1453, 1443, 1302, 1029, 1007, 996, 756, 691 cm<sup>-1</sup>; <sup>1</sup>H NMR (400 MHz, CDCl<sub>3</sub>) δ 7.47-7.44 (m, 2H), 7.37-7.29 (m, 5H), 7.23-7.19 (m, 3H), 5.77 (tq, *J* = 7.2, 1.2 Hz, 1H), 4.99 (br s, 1H), 2.73 (t, *J* = 6.8 Hz, 2H), 2.43 (app q, *J* = 7.2 Hz, 2H), 1.88 (br s, 1H), 1.78 (s, 3H); <sup>13</sup>C NMR (100 MHz, CDCl<sub>3</sub>) δ 142.0, 135.2, 131.9, 128.7, 128.6, 128.5, 128.5, 127.6, 126.1, 122.8, 88.5, 86.2, 68.7, 35.7, 29.9, 12.6; HRMS (EI, M<sup>+</sup>) for C<sub>20</sub>H<sub>20</sub>O calcd 276.1514, found: *m/z* 276.1509.

**1-Cyclohexenyl-3-phenylprop-2-yn-1-ol (1h).**

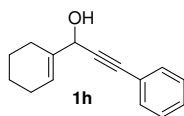

Synthesized according to the previous procedure using cyclohex-1-enecarbaldehyde (2.61 mmol, 287 mg), phenylacetylene (2.61 mmol, 267 mg), and *n*-BuLi (2.61 mmol, 1.63 mL) to afford **1h** (454 mg, yield 82%) as a pale yellow oil: *R*<sub>f</sub> 0.48 (hexane:EtOAc 4:1); IR (microscope) 3406 (br), 3056, 3033, 2930, 2858, 2197, 1714, 1669, 1627, 1489, 1443, 1305, 1029, 1010, 916, 756, 690 cm<sup>-1</sup>; <sup>1</sup>H NMR (400 MHz, CDCl<sub>3</sub>) δ 7.48-7.46 (m, 2H), 7.34-7.31 (m, 3H), 6.00 (br s, 1H), 4.98 (s, 1H), 2.33-2.26 (m, 1H), 2.22-2.17 (m, 1H), 1.90 (br s, 1H), 2.13-2.09 (m, 2H), 1.75-1.70 (m, 2H), 1.68-1.59 (m, 2H); <sup>13</sup>C NMR (100 MHz, CDCl<sub>3</sub>) δ 137.2, 131.9, 128.6, 128.5, 125.3, 122.9, 88.6, 86.1, 67.5, 25.3, 24.4, 22.7, 22.4; HRMS (EI, M<sup>+</sup>) for C<sub>15</sub>H<sub>16</sub>O calcd 212.1201, found: *m/z* 212.1199.

**1-Cyclohexenylnon-2-yn-1-ol (1i).**

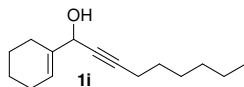



Synthesized according to the previous procedure using cyclohex-1-enecarbaldehyde (3.25 mmol, 357 mg), 1-octyne (3.25 mmol, 357 mg), and *n*-BuLi (3.25 mmol, 2.03 mL) to afford **1i** (652 mg, yield 92%) as a pale yellow oil: *R*<sub>f</sub> 0.58 (hexane:EtOAc 4:1); IR (microscope) 3542 (br), 2930, 2858, 2222, 1636, 1457, 1378, 1136, 992, 847 cm<sup>-1</sup>; <sup>1</sup>H NMR (400 MHz, CDCl<sub>3</sub>) δ 5.90 (br s, 1H), 4.73 (s, 1H), 2.23 (td, *J* = 7.2, 2.0 Hz, 2H), 2.21-2.18 (m, 1H), 2.16-2.06 (m, 3H), 1.73-1.58 (m, 5H), 1.55-1.49 (m, 2H), 1.44-1.29 (m, 6H), 0.91 (t, *J* = 6.8 Hz, 3H); <sup>13</sup>C NMR (100 MHz, CDCl<sub>3</sub>) δ 137.8, 124.6, 86.9, 79.7, 67.3, 31.5, 28.8, 28.7, 25.2, 24.3, 22.7, 22.7, 22.5, 19.0, 14.2; HRMS (EI, M<sup>+</sup>) for C<sub>15</sub>H<sub>24</sub>O calcd 220.1827, found: *m/z* 220.1827.

### 3-Cyclohexenyl-1-cyclopentenylprop-2-yn-1-ol (**1j**).

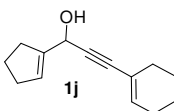

Synthesized according to the previous procedure using cyclopent-1-enecarbaldehyde (4.69 mmol, 450 mg), 1-ethynylcyclohex-1-ene (4.69 mmol, 497 mg), and *n*-BuLi (4.69 mmol, 2.93 mL) to afford **1j** (923 mg, yield 98%) as a pale yellow oil: *R*<sub>f</sub> 0.60 (hexane:EtOAc 4:1); IR (microscope) 3355 (br s), 3026, 2931, 2855, 2217, 2185, 1713, 1629, 1436, 1298, 1040, 950, 918 cm<sup>-1</sup>; <sup>1</sup>H NMR (400 MHz, CDCl<sub>3</sub>) δ 6.12 (tt, *J* = 4.0, 2.0 Hz, 1H), 5.80 (m, 1H), 5.07 (s, 1H), 2.52-2.28 (m, 5H), 2.13-2.06 (m, 4H), 1.94 (quintet, *J* = 7.2 Hz, 2H), 1.66-1.56 (m, 4H); <sup>13</sup>C NMR (100 MHz, CDCl<sub>3</sub>) δ 143.6, 135.4, 127.5, 120.1, 87.1, 85.5, 62.0, 32.2, 31.4, 29.1, 25.5, 23.3, 22.2, 21.4; HRMS (EI, M<sup>+</sup>) for C<sub>14</sub>H<sub>18</sub>O calcd 202.1358, found: *m/z* 202.1353.

### 1-((1*R*,5*S*)-6,6-dimethylbicyclo[3.1.1]hept-2-en-2-yl)-3-phenylprop-2-yn-1-ol (**1k**).

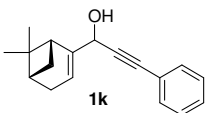

Synthesized according to the previous procedure using (-)-myrtenal (3.59 mmol, 539 mg), phenylacetylene (3.59 mmol, 366 mg), and *n*-BuLi (3.59 mmol, 2.24 mL) to afford **1k** (904 mg, yield 99%) as an inseparable mixture of two diastereomers (*dr* = 1:1): *R*<sub>f</sub> 0.50 (hexane:EtOAc 4:1); Spectral data for the mixture of isomers: IR (microscope) 3341 (br s), 3081, 3054, 3033, 2985, 2915, 2885, 2830, 2226, 1598, 1490, 1443, 1381, 1365, 1264, 1030, 1014, 1030, 957, 755, 690 cm<sup>-1</sup>; <sup>1</sup>H NMR (400 MHz, CDCl<sub>3</sub>) δ 7.47-7.44 (m, 4H), 7.34-7.30 (m, 6H), 5.77 (td, *J* = 3.0, 1.6 Hz, 1H), 5.75-5.74 (m, 1H), 5.02 (d, *J* = 0.8 Hz, 1H), 4.99 (d, *J* = 1.2 Hz, 1H), 2.53-2.45 (m, 4H), 2.43-2.31 (m, 4H), 2.30-2.20 (m, 2H), 2.17-2.14 (m, 2H), 1.36 (s, 3H), 1.35 (s, 3H), 1.28 (dd, *J* = 8.2, 3.0 Hz, 2H; 2 overlapping 1H signals), 0.92 (s, 3H), 0.91 (s, 3H); <sup>13</sup>C NMR (100 MHz, CDCl<sub>3</sub>) δ 146.9, 146.9, 131.9, 131.9, 128.6, 128.5, 128.5, 122.9, 120.3, 119.4, 88.31, 85.8, 85.6, 65.9, 65.5, 43.2, 42.9, 41.0, 41.0, 38.3, 32.0, 31.9, 31.4, 31.4, 26.3, 21.5, 21.4 [Some carbon signals are missing due to peak overlap.]; HRMS (EI, M<sup>+</sup>) for C<sub>18</sub>H<sub>20</sub>O calcd 252.1514, found: *m/z* 252.1513.

**1-((1R,5S)-6,6-dimethylbicyclo[3.1.1]hept-2-en-2-yl)non-2-yn-1-ol (1I).**

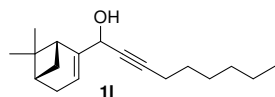

Synthesized according to the previous procedure using (-)-myrtenal (3.14 mmol, 471 mg), 1-octyne (3.14 mmol, 346 mg), and *n*-BuLi (3.14 mmol, 1.96 mL) to afford **1I** (711 mg, yield 87%) as an inseparable mixture of two diastereomers (dr = 1:1): *R<sub>f</sub>* 0.56 (hexane:EtOAc 4:1); Spectral data for the mixture of isomers: IR (microscope) 3365 (br s), 2984, 2930, 2871, 2832, 2222, 1614, 1467, 1381, 1365, 1001, 965 cm<sup>-1</sup>; <sup>1</sup>H NMR (400 MHz, CDCl<sub>3</sub>) δ 5.65-5.63 (m, 2H), 4.74 (d, *J* = 1.2 Hz, 1H), 4.72 (d, *J* = 1.2 Hz, 1H), 2.47-2.36 (m, 4H), 2.33-2.26 (m, 4H), 2.22 (td, *J* = 7.0, 1.5 Hz, 4H), 2.12-2.10 (m, 2H), 1.51 (m, 4H), 1.41-1.33 (m, 4H), 1.32-1.24 (m, 8H), 1.32 (s, 6H), 0.90 (t, *J* = 6.8 Hz, 6H), 0.85 (s, 3H), 0.84 (s, 3H); <sup>13</sup>C NMR (100 MHz, CDCl<sub>3</sub>) δ 147.5, 119.6, 118.9, 86.6, 86.4, 79.2, 79.1, 65.7, 65.3, 43.0, 42.8, 41.0, 41.0, 38.1, 38.1, 32.0, 31.9, 31.5, 31.3, 31.3, 28.8, 28.8, 28.7, 28.7, 26.3, 22.7, 21.4, 21.2, 18.9, 14.2 [Some carbon signals are missing due to peak overlap.]; HRMS (EI, M<sup>+</sup>) for C<sub>18</sub>H<sub>28</sub>O calcd 260.2140, found: *m/z* 260.2138.

**((E)-2-Methyl-1,5-diphenylpent-1-en-4-yn-3-yloxy)triethylsilane (2a).**

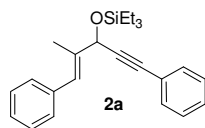

To a flame-dried round bottom flask containing a magnetic stirring bar was sequentially added hydroxyenyne **1a** (1.06 mmol, 264 mg), CH<sub>2</sub>Cl<sub>2</sub> (5 mL), and 2,6-lutidine (3.18 mmol, 0.37 mL) under Ar. The temperature of the solution was dropped to -78 °C. Triethylsilyl trifluoromethanesulfonate (1.59 mmol, 0.36 mL) was added dropwise and the resulting solution was stirred at the same temperature for 30 min. The reaction mixture was quenched with H<sub>2</sub>O and diluted with CH<sub>2</sub>Cl<sub>2</sub>. The separated organic layer was washed with brine, dried over anhydrous MgSO<sub>4</sub>, filtered and concentrated. The crude mixture thus obtained was purified by flash column chromatography (silica gel, 2% EtOAc/hexane) to give pure siloxyenyne **2a** (369 mg, yield 96%): *R<sub>f</sub>* 0.80 (hexane:EtOAc 4:1); IR (film) 3081, 3060, 3026, 2956, 2912, 2876, 2203, 1691, 1665, 1490, 1450, 1238, 1060, 1003, 754, 690 cm<sup>-1</sup>; <sup>1</sup>H NMR (400 MHz, CDCl<sub>3</sub>) δ 7.53-7.50 (m, 2H), 7.43-7.35 (m, 7H), 7.29-7.27 (m, 1H), 6.80 (br s, 1H), 5.21 (s, 1H), 2.11 (d, *J* = 1.2 Hz, 3H), 1.16-1.06 (m, 9H), 0.86-0.80 (m, 6H); <sup>13</sup>C NMR (100 MHz, CDCl<sub>3</sub>) δ 137.5, 137.5, 131.6, 129.0, 128.2, 128.0, 126.5, 125.7, 123.0, 89.2, 85.0, 68.7, 14.1, 6.8, 4.9 [One sp<sup>2</sup> carbon signal is missing due to peak overlap.]; HRMS (EI, M<sup>+</sup>) for C<sub>24</sub>H<sub>30</sub>OSi calcd 362.2066, found: *m/z* 362.2063.

**((E)-2-Methyl-1-phenylundec-1-en-4-yn-3-yloxy)triethylsilane (2b).**

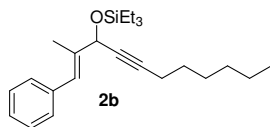

Prepared according to the previous procedure using **1b** (1.95 mmol, 500 mg), 2,6-lutidine (5.85 mmol, 0.68 mL), triethylsilyl trifluoromethanesulfonate (2.93 mmol, 0.66 mL) to afford **2b** (721 mg, yield 99%) as a pale yellow oil:  $R_f$  0.85 (hexane:EtOAc 4:1); IR (microscope) 3062, 3029, 2956, 2932, 2875, 2860, 2211, 1712, 1671, 1601, 1455, 1413, 1379, 1239, 1069, 1005, 745, 700  $\text{cm}^{-1}$ ;  $^1\text{H}$  NMR (400 MHz,  $\text{CDCl}_3$ )  $\delta$  7.34-7.27 (m, 4H), 7.23-7.18 (m, 1H), 6.62 (s, 1H), 4.89 (br s, 1H), 2.23 (td  $J$  = 7.2, 2.0 Hz, 2H), 1.95 (d,  $J$  = 1.2 Hz, 3H), 1.56-1.48 (m, 2H), 1.44-1.36 (m, 2H), 1.35-1.24 (m, 4H), 1.00 (t,  $J$  = 8.0 Hz, 9H), 0.88 (t,  $J$  = 7.0 Hz, 3H), 0.73-0.66 (m, 6H);  $^{13}\text{C}$  NMR (100 MHz,  $\text{CDCl}_3$ )  $\delta$  138.5, 137.9, 129.2, 128.2, 126.6, 125.4, 86.0, 80.2, 68.7, 31.5, 28.8, 28.8, 22.8, 19.1, 14.2, 7.0, 5.1 [One aliphatic carbon signal is missing due to peak overlap.]; HRMS (EI,  $\text{M}^+$ ) for  $\text{C}_{24}\text{H}_{38}\text{OSi}$  calcd 370.2692, found:  $m/z$  370.2684.

**((E)-2,6-Dimethyl-1-phenylhepta-1,6-dien-4-yn-3-yloxy)triethylsilane (2c).**

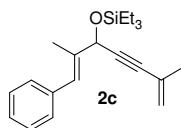

Prepared according to the previous procedure using **1c** (0.92 mmol, 193 mg), 2,6-lutidine (2.76 mmol, 0.32 mL), triethylsilyl trifluoromethanesulfonate (1.38 mmol, 0.31 mL) to afford **2c** (283 mg, yield 95%) as a pale yellow oil:  $R_f$  0.78 (hexane:EtOAc 4:1); IR (film) 3061, 3027, 2956, 2913, 2877, 2204, 1721, 1679, 1616, 1454, 1413, 1239, 1072, 1005, 746, 699  $\text{cm}^{-1}$ ;  $^1\text{H}$  NMR (400 MHz,  $\text{CDCl}_3$ )  $\delta$  7.35-7.27 (m, 4H), 7.24-7.19 (m, 1H), 6.65 (s, 1H), 5.29 (m, 1H), 5.22 (app. quintet,  $J$  = 1.6 Hz, 1H), 5.02 (br s, 1H), 1.97 (d,  $J$  = 1.2 Hz, 3H), 1.90 (dd,  $J$  = 1.4, 1.0 Hz, 3H), 1.01 (t,  $J$  = 7.8 Hz, 9H), 0.71 (m, 6H).  $^{13}\text{C}$  NMR (100 MHz,  $\text{CDCl}_3$ )  $\delta$  137.8, 137.8, 129.2, 128.3, 126.8, 126.7, 125.8, 122.0, 88.4, 86.5, 68.8, 23.5, 14.3, 7.0, 5.12; HRMS (EI,  $\text{M}^+$ ) for  $\text{C}_{21}\text{H}_{30}\text{OSi}$  calcd 326.2066, found:  $m/z$  326.2063.

**((E)-4-Methyl-1-phenylhex-4-en-1-yn-3-yloxy)triethylsilane (2d).**

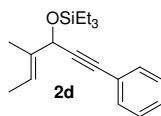

Prepared according to the previous procedure using **1d** (1.38 mmol, 258 mg), 2,6-lutidine (4.14 mmol, 0.48 mL), triethylsilyl trifluoromethanesulfonate (2.07 mmol, 0.47 mL) to afford **2d** (296 mg, yield 72%) as a pale yellow oil:  $R_f$  0.80 (hexane:EtOAc 4:1); IR (film) 3081, 3033, 2955, 2937, 2913, 2876, 2202, 1689, 1672, 1632, 1598, 1490, 1458, 1317, 1239, 1055, 1005, 754, 690  $\text{cm}^{-1}$ ;  $^1\text{H}$  NMR (400 MHz,  $\text{CDCl}_3$ )  $\delta$  7.48-7.44 (m, 2H), 7.35-7.31 (m, 3H), 5.74 (qqd,  $J$  = 6.4, 1.2, 1.2 Hz, 1H), 5.01 (br s, 1H), 1.82 (app. t,  $J$  = 1.0 Hz, 3H), 1.70 (dd,  $J$  = 6.8, 0.8 Hz, 3H), 1.04 (t,  $J$  = 7.8 Hz, 9H),

0.77-0.71 (m, 6H);  $^{13}\text{C}$  NMR (100 MHz,  $\text{CDCl}_3$ )  $\delta$  135.8, 131.8, 128.4, 128.3, 123.4, 121.2, 89.9, 85.0, 68.8, 13.5, 12.3, 7.0, 5.1; HRMS (EI,  $\text{M}^+$ ) for  $\text{C}_{19}\text{H}_{28}\text{OSi}$  calcd 300.1910, found:  $m/z$  300.1906.

**((E)-3-Methyldodec-2-en-5-yn-4-yloxy)triethylsilane (2e).**

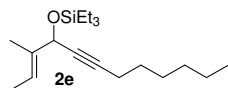

Prepared according to the previous procedure using **1e** (1.46 mmol, 284 mg), 2,6-lutidine (4.38 mmol, 0.50 ml), triethylsilyl trifluoromethanesulfonate (2.19 mmol, 0.49 ml) to afford **2e** (427 mg, 95%) as a pale yellow oil:  $R_f$  0.86 (hexane:EtOAc 4:1); IR (microscope) 2955, 2934, 2876, 2861, 2229, 1458, 1379, 1093, 1045, 1005, 849, 743, 728  $\text{cm}^{-1}$ ;  $^1\text{H}$  NMR (400 MHz,  $\text{CDCl}_3$ )  $\delta$  5.60 (qqd,  $J$  = 6.7, 1.4, 1.4 Hz, 1H), 4.72 (br s, 1H), 2.20 (td,  $J$  = 7.0, 2.0 Hz, 2H), 1.70 (app. t,  $J$  = 1.0 Hz, 3H), 1.61 (dd,  $J$  = 7.2, 1.0 Hz, 3H), 1.54-1.47 (m, 2H), 1.42-1.22 (m, 6H), 0.96 (t,  $J$  = 8.0 Hz, 9H), 0.88 (t,  $J$  = 7.0 Hz, 3H), 0.68-0.61 (m, 6H);  $^{13}\text{C}$  NMR (100 MHz,  $\text{CDCl}_3$ )  $\delta$  136.4, 120.5, 85.7, 80.6, 68.5, 31.5, 28.8, 28.8, 22.8, 19.0, 14.2, 13.4, 12.1, 7.0, 5.0; HRMS (EI,  $\text{M}^+$ ) for  $\text{C}_{19}\text{H}_{36}\text{OSi}$  calcd 308.2535, found:  $m/z$  308.2541.

**((4E)-1-cyclohex-1-enyl-4-methylhex-4-en-1-yn-3-yloxy)triethylsilane (2f).**

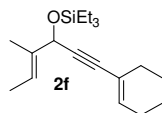

Prepared according to the previous procedure using **1f** (2.42 mmol, 461 mg), 2,6-lutidine (7.26 mmol, 0.84 mL), triethylsilyl trifluoromethanesulfonate (3.63 mmol, 0.82 mL) to afford **2f** (562 mg, yield 77%) as a pale yellow oil:  $R_f$  0.80 (hexane:EtOAc 4:1); IR (microscope) 2953, 2876, 2216, 2188, 1718, 1673, 1457, 1239, 1074, 1006, 842, 742  $\text{cm}^{-1}$ ;  $^1\text{H}$  NMR (400 MHz,  $\text{CDCl}_3$ )  $\delta$  6.06 (app. quintet,  $J$  = 2.0 Hz, 1H), 6.62 (qqd,  $J$  = 6.6, 1.2, 1.2 Hz, 1H), 4.84 (br s, 1H), 2.12-2.04 (m, 4H), 1.71 (app. t,  $J$  = 1.0 Hz, 3H), 1.62 (dd,  $J$  = 6.8, 0.8 Hz, 3H), 1.59-1.53 (m, 4H), 0.97 (t,  $J$  = 7.8 Hz, 9H), 0.69-0.62 (m, 6H);  $^{13}\text{C}$  NMR (100 MHz,  $\text{CDCl}_3$ )  $\delta$  135.8, 134.4, 120.5, 120.4, 86.7, 86.6, 68.5, 29.0, 25.5, 22.2, 21.5, 13.2, 11.9, 6.80, 4.87; HRMS (EI,  $\text{M}^+$ ) for  $\text{C}_{19}\text{H}_{32}\text{OSi}$  calcd 304.2222, found:  $m/z$  304.2220.

**((E)-4-Methyl-1,7-diphenylhept-4-en-1-yn-3-yloxy)triethylsilane (2g).**

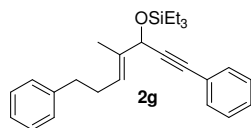

Prepared according to the previous procedure using **1g** (2.83 mmol, 784 mg), 2,6-lutidine (8.49 mmol, 0.98 mL), triethylsilyl trifluoromethanesulfonate (4.25 mmol, 0.96 mL) to afford **2g** (999 mg, yield 91%) as a pale yellow oil:  $R_f$  0.80 (hexane:EtOAc 4:1); IR (film) 3084, 3027, 2955, 2912, 2876, 2202, 1714, 1665, 1602, 1490, 1454, 1239, 1070, 1005, 747, 698  $\text{cm}^{-1}$ ;  $^1\text{H}$  NMR (400 MHz,  $\text{CDCl}_3$ )

$\delta$  7.45-7.42 (m, 2H), 7.33-7.27 (m, 5H), 7.23-7.19 (m, 3H), 5.69 (t,  $J$  = 7.2 Hz, 1H), 4.97 (s, 1H), 2.72 (t,  $J$  = 7.6 Hz, 2H), 2.41 (app. q,  $J$  = 7.6 Hz, 2H), 1.75 (s, 3H), 1.02 (t,  $J$  = 8.0 Hz, 9H), 0.74-0.67 (m, 6H);  $^{13}\text{C}$  NMR (100 MHz,  $\text{CDCl}_3$ )  $\delta$  142.0, 135.5, 131.5, 128.4, 128.2, 128.1, 128.0, 125.7, 125.5, 123.1, 89.6, 84.7, 68.4, 35.5, 29.6, 12.3, 6.8, 4.9; HRMS (EI,  $\text{M}^+$ ) for  $\text{C}_{26}\text{H}_{34}\text{OSi}$  calcd 390.2379, found:  $m/z$  390.2380.

**(1-Cyclohexenyl-3-phenylprop-2-ynyloxy)triethylsilane (2h).**

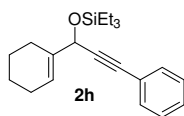

Prepared according to the previous procedure using **1h** (2.25 mmol, 479 mg), 2,6-lutidine (6.75 mmol, 0.785 mL), triethylsilyl trifluoromethanesulfonate (3.38 mmol, 0.76 mL) to afford **2h** (697 mg, yield 95%) as a pale yellow oil:  $R_f$  0.83 (hexane:EtOAc 4:1); IR (microscope) 3060, 2939, 2875, 2201, 1717, 1663, 1598, 1449, 1289, 1115, 1070, 1003, 757, 690  $\text{cm}^{-1}$ ;  $^1\text{H}$  NMR (400 MHz,  $\text{CDCl}_3$ )  $\delta$  7.48-7.45 (m, 2H), 7.34-7.31 (m, 3H), 5.97 (br s, 1H), 5.00 (br s, 1H), 2.26-2.20 (m, 2H), 2.13-2.10 (m, 2H), 1.76-1.69 (m, 2H), 1.67-1.61 (m, 2H), 1.06 (t,  $J$  = 8.0 Hz, 9H), 0.78-0.72 (m, 6H);  $^{13}\text{C}$  NMR (100 MHz,  $\text{CDCl}_3$ )  $\delta$  137.7, 131.8, 128.4, 128.3, 123.6, 123.4, 89.8, 85.1, 67.6, 25.3, 24.5, 22.8, 22.6, 7.1, 5.1; HRMS (EI,  $\text{M}^+$ ) for  $\text{C}_{21}\text{H}_{30}\text{OSi}$  calcd 326.2066, found:  $m/z$  326.2063.

**(1-Cyclohexenylnon-2-ynyloxy)triethylsilane (2i).**

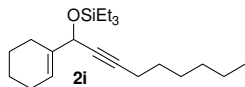

Prepared according to the previous procedure using **1i** (2.95 mmol, 651 mg), 2,6-lutidine (8.85 mmol, 1.0 mL), triethylsilyl trifluoromethanesulfonate (4.43 mmol, 1.0 mL) to afford **2i** (927 mg, yield 94%) as a pale yellow oil:  $R_f$  0.84 (hexane:EtOAc 4:1); IR (microscope) 2954, 2933, 2875, 2859, 2838, 2225, 1644, 1458, 1413, 1326, 1239, 1127, 1057, 1035, 1005, 742, 728  $\text{cm}^{-1}$ ;  $^1\text{H}$  NMR (400 MHz,  $\text{CDCl}_3$ )  $\delta$  5.83 (br s, 1H), 4.73 (br s, 1H), 2.22 (td,  $J$  = 6.8, 2.0 Hz, 2H), 2.14-2.11 (m, 2H), 2.07-2.04 (m, 2H), 1.68-1.63 (m, 2H), 1.61-1.55 (m, 2H), 1.53-1.48 (m, 2H), 1.44-1.35 (m, 2H), 1.35-1.26 (m, 4H), 0.99 (t,  $J$  = 7.8 Hz, 9H), 0.90 (t,  $J$  = 6.8 Hz, 3H), 0.70-0.63 (m, 6H);  $^{13}\text{C}$  NMR (100 MHz,  $\text{CDCl}_3$ )  $\delta$  138.3, 122.9, 85.6, 80.4, 67.3, 31.5, 28.8, 28.7, 25.2, 24.3, 22.8, 22.7, 22.6, 19.0, 14.2, 7.0, 5.1; HRMS (EI,  $\text{M}^+$ ) for  $\text{C}_{21}\text{H}_{38}\text{OSi}$  calcd 334.2692, found:  $m/z$  334.2688.

**(3-Cyclohexenyl-1-cyclopentenylprop-2-ynyloxy)triethylsilane (2j).**

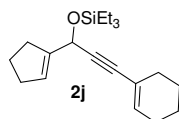

Prepared according to the previous procedure using **1j** (1.81 mmol, 366 mg), 2,6-lutidine (5.43 mmol, 0.63 mL), triethylsilyl trifluoromethanesulfonate (2.72 mmol, 0.61 mL) to afford **2j** (413 mg, yield

73%) as a pale yellow oil:  $R_f$  0.78 (hexane:EtOAc 4:1); IR (microscope) 2952, 2876, 2214, 2188, 1717, 1666, 1436, 1239, 1073, 1005, 742, 728  $\text{cm}^{-1}$ ;  $^1\text{H}$  NMR (400 MHz,  $\text{CDCl}_3$ )  $\delta$  6.09 (t,  $J$  = 2.0 Hz, 1H), 5.76 (br s, 1H), 5.10 (br s, 1H), 2.48-2.33 (m, 4H), 2.14-2.07 (m, 4H), 1.93 (app quintet,  $J$  = 7.6 Hz, 2H), 1.67-1.56 (m, 4H), 1.00 (t,  $J$  = 7.8 Hz, 9H), 0.72-0.65 (m, 6H);  $^{13}\text{C}$  NMR (100 MHz,  $\text{CDCl}_3$ )  $\delta$  144.5, 134.7, 126.6, 120.6, 86.5, 86.5, 62.4, 32.4, 31.8, 29.3, 25.8, 23.6, 22.5, 21.7, 7.0, 5.1; HRMS (EI,  $\text{M}^+$ ) for  $\text{C}_{20}\text{H}_{32}\text{OSi}$  calcd 316.2222, found:  $m/z$  316.2219.

**(1-((1R,5S)-6,6-dimethylbicyclo[3.1.1]hept-2-en-2-yl)-3-phenylprop-2-ynyloxy)triethylsilane (2k).**

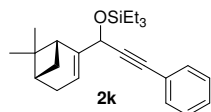

Prepared according to the previous procedure using **1k** (1.99 mmol, 503 mg), 2,6-lutidine (5.97 mmol, 0.69 mL), triethylsilyl trifluoromethanesulfonate (2.99 mmol, 0.67 mL) to afford **2l** (686 mg, yield 94%) as an inseparable mixture of two diastereomers (dr = 1:1):  $R_f$  0.80 (hexane:EtOAc 4:1); Spectral data for the mixture of isomers: IR (microscope) 3081, 3055, 3033, 2986, 2952, 2913, 2876, 2831, 2224, 1598, 1490, 1465, 1381, 1314, 1238, 1125, 1083, 1064, 1051, 1002, 977, 850, 754, 690  $\text{cm}^{-1}$ ;  $^1\text{H}$  NMR (400 MHz,  $\text{CDCl}_3$ )  $\delta$  7.43-7.40 (m, 4H), 7.33-7.29 (m, 6H), 5.68 (td,  $J$  = 3.0, 1.4 Hz, 1H), 5.64 (td,  $J$  = 2.8, 1.2 Hz, 1H), 5.00 (d,  $J$  = 1.2 Hz, 1H), 4.97 (d,  $J$  = 1.6 Hz, 1H), 2.48-2.43 (m, 3H), 2.40-2.35 (m, 3H), 2.32-2.25 (m, 2H), 2.14-2.11 (m, 2H), 1.33 (s, 6H), 1.28-1.24 (m, 2H), 1.03 (t,  $J$  = 7.8 Hz, 9H), 1.02 (t,  $J$  = 7.8 Hz, 9H), 0.91 (s, 3H), 0.90 (s, 3H), 0.75-0.67 (m, 12H);  $^{13}\text{C}$  NMR (100 MHz,  $\text{CDCl}_3$ )  $\delta$  147.4, 137.2, 131.8, 131.8, 128.4, 128.4, 128.2, 128.2, 123.5, 123.4, 89.3, 89.3, 84.5, 84.5, 65.9, 65.4, 43.2, 42.9, 41.2, 41.1, 38.3, 38.2, 32.0, 31.8, 31.3, 31.3, 26.5, 26.4, 21.4, 21.3, 7.0, 7.0, 5.2, 5.1 [Some carbon signals are missing due to peak overlap.]; HRMS (EI,  $\text{M}^+$ ) for  $\text{C}_{24}\text{H}_{34}\text{OSi}$  calcd 366.2379, found:  $m/z$  366.2377.

**(1-((1R,5S)-6,6-dimethylbicyclo[3.1.1]hept-2-en-2-yl)non-2-ynyloxy)triethylsilane (2l).**

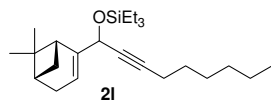

Prepared according to the previous procedure using **1l** (1.53 mmol, 399.1 mg), 2,6-lutidine (4.59 mmol, 0.54 mL), triethylsilyl trifluoromethanesulfonate (2.30 mmol, 0.52 mL) to afford **2l** (500 mg, yield 87%) as an inseparable mixture of two diastereomers (dr = 1:1):  $R_f$  0.90 (hexane:EtOAc 4:1); Spectral data for the mixture of isomers: IR (microscope) 2986, 2953, 2934, 1916, 2876, 2225, 1607, 1466, 1431, 1414, 1238, 1121, 1062, 1050, 1005, 852, 743  $\text{cm}^{-1}$ ;  $^1\text{H}$  NMR (400 MHz,  $\text{CDCl}_3$ )  $\delta$  5.58-5.54 (m, 2H), 4.75-4.73 (m, 2H), 2.44-2.39 (m, 2H), 2.37-2.33 (m, 2H), 2.32-2.30 (m, 2H), 2.28-2.25 (m, 2H), 2.20 (td,  $J$  = 7.0, 2.0 Hz, 4H), 2.13-2.08 (m, 2H), 1.53-1.48 (m, 4H), 1.43-1.34 (m, 6H), 1.34-1.25 (m, 6H), 1.31 (s, 6H), 1.20 (t,  $J$  = 8.4 Hz, 2H), 1.00 (t,  $J$  = 8.0 Hz, 9H), 0.99 (t,  $J$  =

8.0 Hz, 9H), 0.91 (t,  $J$  = 6.8 Hz, 6H), 0.85 (s, 3H), 0.84 (s, 3H), 0.70-0.64 (m, 12H);  $^{13}\text{C}$  NMR (100 MHz,  $\text{CDCl}_3$ )  $\delta$  147.9, 117.4, 117.1, 85.1, 79.9, 65.5, 65.1, 43.1, 42.9, 41.2, 41.1, 38.2, 38.1, 32.0, 31.8, 31.6, 31.2, 31.2, 28.8, 28.8, 28.7, 26.4, 26.4, 22.8, 21.4, 21.3, 19.0, 19.0, 14.2, 7.1, 7.0, 5.2, 5.1 [Some carbon signals are missing due to peak overlap.]; HRMS (EI,  $\text{M}^+$ ) for  $\text{C}_{24}\text{H}_{42}\text{OSi}$  calcd 374.3005, found:  $m/z$  374.3008.

**2-Methylene-3,4-diphenylcyclopentanone (4a) and 2-methyl-3,4-diphenylcyclopent-2-enone (5a).**

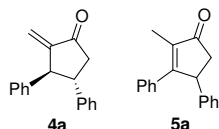

To a flame-dried round bottom flask containing a magnetic stirring bar was added siloxyenyne **2a** (0.044 mmol, 16 mg) and ether (4 mL) under Ar. The temperature of the solution was dropped to  $-78\text{ }^\circ\text{C}$  (acetone/dry ice bath).  $\text{KO}^t\text{-Bu}$  (0.07 mmol, 7 mg) was added in one portion and the resulting suspension was stirred vigorously followed by the immediate removal of the cooling bath. Upon consumption of **2a** as determined by thin layer chromatography, the reaction was quenched with 15% aqueous  $\text{NH}_4\text{Cl}$  and diluted with ether. The separated organic layer was washed with brine, dried over anhydrous  $\text{MgSO}_4$ , filtered and concentrated to give the crude siloxyallene **3a** which was used for the next step without further purification. The unpurified **3a** thus obtained was dissolved in  $\text{CH}_2\text{Cl}_2$  (2 mL) and treated with trifluoroacetic acid (3.0 equiv based on **2a**, 0.13 mmol, 10  $\mu\text{L}$ ) at room temperature. After stirring for 4 h, the reaction was quenched with saturated aqueous  $\text{NaHCO}_3$  and diluted with  $\text{CH}_2\text{Cl}_2$ . The separated organic layer was washed with brine, dried over anhydrous  $\text{MgSO}_4$ , filtered and concentrated. The crude mixture was purified by flash column chromatography (silica gel, 10% EtOAc/hexane) to provide the desired products **4a** (5.6 mg, yield 51%) and **5a** (5.1 mg, yield 47%). **4a**:  $R_f$  0.61 (hexane:EtOAc 4:1); IR (film) 3085, 3061, 3028, 2925, 2854, 1718, 1601, 1495, 1453, 1119, 1075, 785, 698  $\text{cm}^{-1}$ ;  $^1\text{H}$  NMR (400 MHz,  $\text{CDCl}_3$ )  $\delta$  7.29-7.17 (m, 6H), 7.12-7.07 (m, 4H), 6.22 (dd,  $J$  = 3.3, 0.9 Hz, 1H), 5.04 (dd,  $J$  = 3.0, 0.8 Hz, 1H), 3.96 (ddd,  $J$  = 10.6, 3.0, 3.0 Hz, 1H), 3.41 (ddd,  $J$  = 11.2, 11.2, 7.2 Hz, 1H), 2.91 (ddd,  $J$  = 18.2, 7.6, 0.8 Hz, 1H), 2.71 (dd,  $J$  = 18.0, 12.0 Hz, 1H);  $^{13}\text{C}$  NMR (100 MHz,  $\text{CDCl}_3$ )  $\delta$  204.7, 149.6, 141.1, 140.9, 128.9, 128.8, 128.8, 127.4, 127.3, 127.2, 120.0, 56.7, 48.9, 45.8; HRMS (EI,  $\text{M}^+$ ) for  $\text{C}_{18}\text{H}_{16}\text{O}$  calcd 248.1201, found:  $m/z$  248.1201. **5a**:  $R_f$  0.50 (hexane:EtOAc 4:1); IR (film) 3060, 3027, 2923, 2853, 1698, 1624, 1495, 1454, 1443, 1378, 1342, 1076, 761, 698  $\text{cm}^{-1}$ ;  $^1\text{H}$  NMR (400 MHz,  $\text{CDCl}_3$ )  $\delta$  7.27-7.02 (m, 10H), 4.43 (ddq,  $J$  = 7.1, 2.0, 2.0 Hz, 1H), 3.05 (dd,  $J$  = 19.0, 7.2 Hz, 1H), 2.44 (dd,  $J$  = 19.0, 2.2 Hz, 1H), 1.97 (d,  $J$  = 2.0 Hz, 3H);  $^{13}\text{C}$  NMR (100 MHz,  $\text{CDCl}_3$ )  $\delta$  208.9, 169.1, 142.4, 137.7, 135.3, 128.9, 128.7, 128.3, 128.0, 127.3, 126.7, 47.1, 45.1, 9.9; HRMS (EI,  $\text{M}^+$ ) for  $\text{C}_{18}\text{H}_{16}\text{O}$  calcd 248.1201, found:  $m/z$  248.1198.

**4-Hexyl-2-methyl-3-phenylcyclopent-2-enone (5b).**

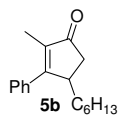

As described for the synthesis of siloxyallene **3a**, compound **2b** (0.18 mmol, 69 mg) in 3 mL ether was reacted with KO<sup>t</sup>-Bu (0.27 mmol, 30 mg) followed by workup as described above to give crude **3b**. The desired Nazarov product was then prepared according to the previous procedure using trifluoroacetic acid (0.54 mmol, 40  $\mu$ L) to afford **5b** (38 mg, yield 82%) as a pale yellow oil:  $R_f$  0.65 (hexane:EtOAc 4:1); IR (microscope) 3058, 3030, 2955, 2927, 2855, 1702, 1629, 1454, 1379, 1342, 1075, 777, 698  $\text{cm}^{-1}$ ;  $^1\text{H}$  NMR (400 MHz,  $\text{CDCl}_3$ )  $\delta$  7.48-7.44 (m, 2H), 7.42-7.25 (m, 3H), 3.26 (m, 1H), 2.69 (dd,  $J$  = 18.8, 6.4 Hz, 1H), 2.22 (dd,  $J$  = 18.8, 2.0 Hz, 1H), 1.84 (d,  $J$  = 1.6 Hz, 3H), 1.58-1.51 (m, 2H), 1.28-1.10 (m, 8H), 0.833 (t,  $J$  = 6.4 Hz, 3H);  $^{13}\text{C}$  NMR (100 MHz,  $\text{CDCl}_3$ )  $\delta$  209.3, 172.0, 136.9, 135.9, 129.1, 128.8, 127.8, 41.2, 40.8, 33.9, 31.8, 29.4, 27.2, 22.7, 14.2, 9.6; HRMS (EI,  $\text{M}^+$ ) for  $\text{C}_{18}\text{H}_{24}\text{O}$  calcd 256.1827, found:  $m/z$  256.1826.

### 2-Methyl-3-phenyl-4-(prop-1-en-2-yl)cyclopent-2-enone (**5c**).

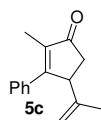

As described for the synthesis of siloxyallene **3a**, compound **2c** (0.57 mmol, 188 mg) in 4 mL ether was reacted with KO<sup>t</sup>-Bu (0.86 mmol, 96 mg) followed by workup as described above to give crude **3c**. The desired Nazarov product was then prepared according to the previous procedure using trifluoroacetic acid (1.71 mmol, 127  $\mu$ L) to afford **5c** (43 mg, yield 35%) as a pale yellow oil:  $R_f$  0.51 (hexane:EtOAc 4:1); IR (microscope) 3074, 3024, 2924, 2856, 1699, 1648, 1624, 1442, 1377, 1340, 1277, 894, 733, 696  $\text{cm}^{-1}$ ;  $^1\text{H}$  NMR (400 MHz,  $\text{CDCl}_3$ )  $\delta$  7.43-7.38 (m, 5H), 4.83-4.82 (m, 1H), 4.74 (app. quintet,  $J$  = 1.6 Hz, 1H), 4.01 (dt,  $J$  = 7.2, 2.0 Hz, 1H), 2.78 (dd,  $J$  = 19.0, 7.0 Hz, 1H), 2.35 (dd,  $J$  = 18.8, 2.0 Hz, 1H), 1.94 (d,  $J$  = 2.0 Hz, 3H), 1.25 (s, 3H);  $^{13}\text{C}$  NMR (100 MHz,  $\text{CDCl}_3$ )  $\delta$  208.7, 168.7, 144.8, 138.2, 135.6, 129.4, 128.6, 128.2, 114.2, 48.9, 40.9, 18.3, 10.1; HRMS (EI,  $\text{M}^+$ ) for  $\text{C}_{15}\text{H}_{16}\text{O}$  calcd 212.1201, found:  $m/z$  212.1199.

### 3-Methyl-2-methylene-4-phenylcyclopentanone (**4d**) and 2,3-Dimethyl-4-phenylcyclopent-2-enone (**5d**).

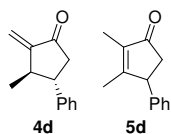

As described for the synthesis of siloxyallene **3a**, compound **2d** (0.56 mmol, 170 mg) in 3 mL ether was reacted with KO<sup>t</sup>-Bu (0.84 mmol, 94 mg) followed by workup as described above to give crude **3d**. The desired Nazarov product was then prepared according to the previous procedure using trifluoroacetic acid (1.68 mmol, 125  $\mu$ L) to afford **4d** (10 mg, yield 10%) and **5d** (32 mg, yield 30%).



**4d:**  $R_f$  0.64 (hexane:EtOAc 4:1); IR (film) 3061, 3029, 2691, 2926, 2874, 2853, 1726, 1641, 1602, 1495, 1454, 1376, 1221, 1169, 1123, 1074, 759, 700  $\text{cm}^{-1}$ ;  $^1\text{H}$  NMR (400 MHz,  $\text{CDCl}_3$ )  $\delta$  7.40-7.36 (m, 2H), 7.31-7.27 (m, 3H), 6.13 (dd,  $J = 2.8, 0.8$  Hz, 1H), 5.29 (d,  $J = 2.4$  Hz, 1H), 2.84-2.74 (m, 3H), 2.59-2.51 (m, 1H), 1.18 (d,  $J = 6.0$  Hz, 3H);  $^{13}\text{C}$  NMR (100 MHz,  $\text{CDCl}_3$ )  $\delta$  205.5, 150.4, 141.8, 128.9, 127.5, 127.2, 116.6, 48.6, 46.3, 44.2, 16.3; HRMS (EI,  $\text{M}^+$ ) for  $\text{C}_{13}\text{H}_{14}\text{O}$  calcd 186.1045, found:  $m/z$  186.1041. **5d:**  $R_f$  0.51 (hexane:EtOAc 4:1); IR (microscope) 3062, 3027, 2961, 2923, 1701, 1648, 1601, 1494, 1454, 1384, 1323, 1073, 764, 702  $\text{cm}^{-1}$ ;  $^1\text{H}$  NMR (400 MHz,  $\text{CDCl}_3$ )  $\delta$  7.36-7.32 (m, 2H), 7.29-7.25 (m, 1H), 7.12-7.09 (m, 2H), 3.83 (br d,  $J = 6.4$  Hz, 1H), 2.92 (dd,  $J = 19.0, 7.0$  Hz, 1H), 2.38 (dd,  $J = 18.8, 2.4$  Hz, 1H), 1.84 (q,  $J = 0.8$  Hz, 3H), 1.81 (q,  $J = 0.8$  Hz, 3H);  $^{13}\text{C}$  NMR (100 MHz,  $\text{CDCl}_3$ )  $\delta$  209.2, 171.7, 142.3, 129.1, 129.1, 127.5, 127.2, 49.4, 44.7, 15.7, 8.4; HRMS (EI,  $\text{M}^+$ ) for  $\text{C}_{13}\text{H}_{14}\text{O}$  calcd 186.1045, found:  $m/z$  186.1042.

#### 4-Hexyl-2,3-dimethylcyclopent-2-enone (5e).

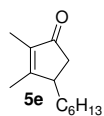

As described for the synthesis of siloxyallene **3a**, compound **2e** (0.58 mmol, 180 mg) in 5 mL ether was reacted with  $\text{KO}t\text{-Bu}$  (0.87 mmol, 98 mg) followed by workup as described above to give crude **3e**. The desired Nazarov product was then prepared according to the previous procedure using trifluoroacetic acid (1.74 mmol, 129  $\mu\text{L}$ ) to afford **5e** (51 mg, 45%) as a pale yellow oil:  $R_f$  0.58 (hexane:EtOAc 4:1); IR (microscope) 2956, 2927, 2856, 1702, 1648, 1457, 1410, 1384, 1325, 1072  $\text{cm}^{-1}$ ;  $^1\text{H}$  NMR (400 MHz,  $\text{CDCl}_3$ )  $\delta$  2.64-2.60 (m, 1H), 2.48 (dd,  $J = 18.4, 6.4$  Hz, 1H), 2.67 (dd,  $J = 18.6, 1.8$  Hz, 1H), 1.98 (s, 3H), 1.78-1.73 (m, 2H), 1.67 (q,  $J = 0.8$  Hz, 3H), 1.35-1.21 (m, 8H), 0.88 (t,  $J = 6.8$  Hz, 3H);  $^{13}\text{C}$  NMR (100 MHz,  $\text{CDCl}_3$ )  $\delta$  209.0, 172.9, 136.2, 42.7, 40.5, 32.8, 31.7, 9.3, 27.0, 22.5, 15.1, 14.0, 7.9; HRMS (EI,  $\text{M}^+$ ) for  $\text{C}_{13}\text{H}_{22}\text{O}$  calcd 194.1671, found:  $m/z$  194.1670.

#### 4-Cyclohexenyl-2,3-dimethylcyclopent-2-enone (5f).

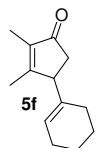

As described for the synthesis of siloxyallene **3a**, compound **2f** (0.48 mmol, 147 mg) in 3 mL ether was reacted with  $\text{KO}t\text{-Bu}$  (0.72 mmol, 82 mg) followed by workup as described above to give crude **3f**. The desired Nazarov product was then prepared according to the previous procedure using trifluoroacetic acid (1.44 mmol, 107  $\mu\text{L}$ ) to afford **5f** (41 mg, yield 45%) as a pale yellow oil:  $R_f$  0.60 (hexane:EtOAc 4:1); IR (microscope) 2927, 2858, 2837, 1701, 1649, 1573, 1437, 1383, 1072  $\text{cm}^{-1}$ ;  $^1\text{H}$  NMR (400 MHz,  $\text{CDCl}_3$ )  $\delta$  5.57 (m, 1H), 3.23 (br d,  $J = 6.8$  Hz, 1H), 2.51 (dd,  $J = 19.0, 7.0$  Hz, 1H), 2.18 (dd,  $J = 19.0, 1.8$  Hz, 1H), 2.04-2.02 (m, 2H), 1.89 (s, 3H), 1.70 (q,  $J = 1.2$  Hz, 3H),

1.61-1.54 (m, 6H);  $^{13}\text{C}$  NMR (100 MHz,  $\text{CDCl}_3$ )  $\delta$  209.0, 171.5, 137.2, 136.6, 125.0, 51.2, 40.0, 25.3, 23.7, 22.7, 22.4, 15.1, 8.1; HRMS (EI,  $\text{M}^+$ ) for  $\text{C}_{13}\text{H}_{18}\text{O}$  calcd 190.1358, found:  $m/z$  190.1358.

**2-Methylene-3-phenethyl-4-phenylcyclopentanone (4g) and 2-methyl-3-phenethyl-4-phenylcyclopent-2-enone (5g).**

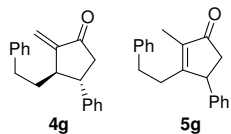

As described for the synthesis of siloxyallene **3a**, compound **2g** (0.31 mmol, 123 mg) in 5 mL ether was reacted with  $\text{KO}t\text{-Bu}$  (0.46 mmol, 52 mg) followed by workup as described above to give crude **3g**. The desired Nazarov product was then prepared according to the previous procedure using trifluoroacetic acid (0.93 mmol, 69  $\mu\text{L}$ ) to afford **4g** (24 mg, yield 28%) and **5g** (33 mg, 39%). **4g**:  $R_f$  0.53 (hexane:EtOAc 4:1); IR (microscope) 3084, 3061, 3027, 3003, 2927, 2860, 1725, 1637, 1602, 1495, 1453, 1370, 1222, 1171, 1158, 1030, 753, 700  $\text{cm}^{-1}$ ;  $^1\text{H}$  NMR (400 MHz,  $\text{CDCl}_3$ )  $\delta$  7.37-7.17 (m, 8H), 7.09-7.06 (m, 2H), 6.21 (d,  $J = 2.4$  Hz, 1H), 5.40 (d,  $J = 2.4$  Hz, 1H), 3.22 (app. q,  $J = 8.7$  Hz, 1H), 3.00-2.94 (m, 1H), 2.84 (dd,  $J = 18.4, 7.9$  Hz, 1H), 2.64-2.60 (m, 2H), 2.52 (dd,  $J = 18.4, 9.8$  Hz, 1H), 2.01-1.94 (m, 2H);  $^{13}\text{C}$  NMR (100 MHz,  $\text{CDCl}_3$ )  $\delta$  205.41, 148.4, 142.9, 141.6, 128.8, 128.4, 128.2, 127.1, 126.9, 125.9, 117.4, 48.1, 46.2, 45.5, 34.2, 32.7; HRMS (EI,  $\text{M}^+$ ) for  $\text{C}_{20}\text{H}_{20}\text{O}$  calcd 276.1514, found:  $m/z$  276.1514. **5g**:  $R_f$  0.47 (hexane:EtOAc 4:1); IR (microscope) 3084, 3026, 3002, 2924, 2860, 1700, 1643, 1601, 1494, 1454, 1325, 1076, 756, 701  $\text{cm}^{-1}$ ;  $^1\text{H}$  NMR (400 MHz,  $\text{CDCl}_3$ )  $\delta$  7.37-7.32 (m, 2H), 7.30-7.25 (m, 3H), 7.23-7.19 (m, 1H), 7.11-7.06 (m, 4H), 3.85 (dd,  $J = 6.8, 1.6$  Hz, 1H), 2.89 (dd,  $J = 18.8, 7.0$  Hz, 1H), 2.80-2.68 (m, 2H), 2.64-2.56 (m, 1H), 2.39 (dd,  $J = 18.9, 2.3$  Hz, 1H), 2.39-2.31 (m, 1H), 1.73 (d,  $J = 1.9$  Hz, 3H);  $^{13}\text{C}$  NMR (100 MHz,  $\text{CDCl}_3$ )  $\delta$  209.1, 173.8, 141.8, 140.6, 137.5, 128.9, 128.4, 128.1, 127.4, 127.1, 126.3, 47.2, 44.5, 33.2, 31.0, 8.1; HRMS (EI,  $\text{M}^+$ ) for  $\text{C}_{20}\text{H}_{20}\text{O}$  calcd 276.1514, found:  $m/z$  276.1514.

**2,3,3a,4,5,6-Hexahydro-3-phenylinden-1-one (4h) and 2,3,4,5,6,7-hexahydro-3-phenylinden-1-one (5h).**

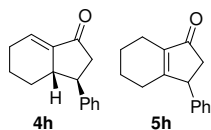

As described for the synthesis of siloxyallene **3a**, compound **2h** (0.06 mmol, 19 mg) in 3 mL ether was reacted with  $\text{KO}t\text{-Bu}$  (0.09 mmol, 10 mg) followed by workup as described above to give crude **3h**. The desired Nazarov product was then prepared according to the previous procedure using trifluoroacetic acid (0.18 mmol, 13  $\mu\text{L}$ ) to afford **4h** (8 mg, yield 65%) and **5h** (2 mg, 14%). **4h**:  $R_f$  0.52 (hexane:EtOAc 4:1); IR (microscope) 3061, 3028, 2931, 2858, 1719, 1652, 1601, 1453, 1247, 1223, 1187, 930, 749, 700  $\text{cm}^{-1}$ ;  $^1\text{H}$  NMR (400 MHz,  $\text{CDCl}_3$ )  $\delta$  7.40-7.35 (m, 2H), 7.32-7.27 (m, 3H),

6.81 (app. q,  $J = 2.4$  Hz, 1H), 2.83 (ddd,  $J = 12.6, 10.6, 7.0$  Hz, 1H), 2.71-2.63 (m, 1H), 2.68 (dd,  $J = 17.8, 7.4$  Hz, 1H), 2.55 (dd,  $J = 17.8, 12.6$  Hz, 1H), 2.40-3.32 (m, 1H), 2.86-2.17 (m, 1H), 2.04 (dq,  $J = 12.0, 3.2$  Hz, 1H), 1.92-1.86 (m, 1H), 1.55-1.43 (m, 1H), 1.19-1.09 (m, 1H);  $^{13}\text{C}$  NMR (100 MHz,  $\text{CDCl}_3$ )  $\delta$  204.7, 141.8, 141.3, 133.2, 128.9, 127.3, 127.1, 48.4, 46.3, 46.0, 27.3, 25.7, 21.8; HRMS (EI,  $\text{M}^+$ ) for  $\text{C}_{15}\text{H}_{16}\text{O}$  calcd 212.1201, found:  $m/z$  212.1203. **5h**:  $R_f$  0.48 (hexane:EtOAc 4:1); IR (microscope) 3061, 3027, 2930, 2858, 1698, 1645, 1453, 1390, 1277, 1245, 766, 701  $\text{cm}^{-1}$ ;  $^1\text{H}$  NMR (400 MHz,  $\text{CDCl}_3$ )  $\delta$  7.37-7.31 (m, 2H), 7.28-7.24 (m, 1H), 7.12-7.10 (m, 2H), 3.85 (br d,  $J = 6.8$  Hz, 1H), 2.93 (dd,  $J = 18.8, 7.2$  Hz, 1H), 2.38 (dd,  $J = 18.8, 2.4$  Hz, 1H), 2.27-2.25 (m, 2H), 2.10-2.07 (m, 2H), 1.72-1.66 (m, 4H);  $^{13}\text{C}$  NMR (100 MHz,  $\text{CDCl}_3$ )  $\delta$  208.4, 175.4, 142.1, 139.5, 129.1, 127.5, 127.2, 48.2, 45.1, 26.7, 22.4, 21.8, 20.3; HRMS (EI,  $\text{M}^+$ ) for  $\text{C}_{15}\text{H}_{16}\text{O}$  calcd 212.1201, found:  $m/z$  212.1197.

### 3-Hexyl-2,3,3a,4,5,6-hexahydroinden-1-one (**4i**) and 3-hexyl-2,3,4,5,6,7-hexahydroinden-1-one (**5i**).

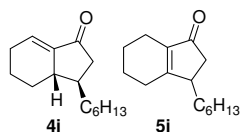

As described for the synthesis of siloxyallene **3a**, compound **2i** (0.28 mmol, 96 mg) in 4 mL ether was reacted with  $\text{KO}t\text{-Bu}$  (0.42 mmol, 48 mg) followed by workup as described above to give crude **3i**. The desired Nazarov product was then prepared according to the previous procedure using trifluoroacetic acid (0.84 mmol, 64  $\mu\text{L}$ ) to afford **4i** (21 mg, yield 33%) and **5i** (12 mg, yield 20%).

**4i**:  $R_f$  0.61 (hexane:EtOAc 4:1); IR (microscope) 2927, 2856, 1720, 1655, 1456, 1248, 1170, 1139  $\text{cm}^{-1}$ ;  $^1\text{H}$  NMR (400 MHz,  $\text{CDCl}_3$ )  $\delta$  6.67 (br s, 1H), 2.47 (dd,  $J = 17.8, 7.0$  Hz, 1H), 2.44-2.38 (m, 1H), 2.33-2.23 (m, 1H), 2.22-2.14 (m, 3H), 1.74-1.44 (m, 6H), 1.36-1.27 (m, 8H), 0.911 (t,  $J = 6.6$  Hz, 3H);  $^{13}\text{C}$  NMR (100 MHz,  $\text{CDCl}_3$ )  $\delta$  206.1, 142.0, 132.0, 45.0, 44.7, 42.5, 34.4, 32.0, 29.7, 28.2, 27.8, 25.6, 22.8, 21.9, 14.3; HRMS (ESI,  $[\text{M}+\text{H}]^+$ ) for  $\text{C}_{15}\text{H}_{25}\text{O}$  calcd 221.1900, found:  $m/z$  221.1901.

**5i**:  $R_f$  0.57 (hexane:EtOAc 4:1); IR (microscope) 2927, 2856, 1698, 1647, 1457, 1437, 1277, 1169  $\text{cm}^{-1}$ ;  $^1\text{H}$  NMR (400 MHz,  $\text{CDCl}_3$ )  $\delta$  2.68 (m, 1H), 2.53 (dd,  $J = 18.6, 6.6$  Hz, 1H), 2.44-2.36 (m, 1H), 2.22-2.12 (m, 3H), 2.07 (dd,  $J = 18.2, 2.2$  Hz, 1H), 1.78-1.59 (m, 6H), 1.34-1.30 (m, 8H), 0.90 (t,  $J = 6.8$  Hz, 3H);  $^{13}\text{C}$  NMR (100 MHz,  $\text{CDCl}_3$ )  $\delta$  208.6, 176.7, 138.6, 42.1, 41.3, 33.0, 31.9, 29.6, 27.3, 26.6, 22.8, 22.4, 21.9, 20.2, 14.2; HRMS (ESI,  $[\text{M}+\text{H}]^+$ ) for  $\text{C}_{15}\text{H}_{25}\text{O}$  calcd 221.1900, found 221.1898.

### 3-Cyclohexylidene-2,3,5,6-tetrahydropentalen-1(4H)-one (**7**) and (2E)-3-cyclohexenyl-1-cyclopentenylprop-2-en-1-one (**6j**).

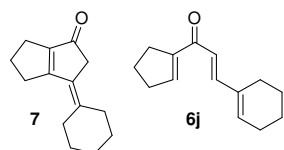

As described for the synthesis of siloxyallene **3a**, compound **2j** (0.63 mmol, 202 mg) in 5 mL ether was reacted with KO<sup>t</sup>-Bu (0.95 mmol, 105 mg) followed by workup as described above to give crude **3j**. The desired Nazarov product was then prepared according to the previous procedure using trifluoroacetic acid (1.89 mmol, 140  $\mu$ L) to afford **7** (35 mg, yield 28%) and **6j** (2 mg, yield 2%). **7**:  $R_f$  0.65 (hexane:EtOAc 4:1); IR (microscope) 3346, 2929, 2878, 2861, 2818, 1691, 1659, 1635, 1450, 1394, 1277, 1229, 1162, 1098, 1058, 750  $\text{cm}^{-1}$ ;  $^1\text{H}$  NMR (400 MHz,  $\text{CDCl}_3$ )  $\delta$  2.93-2.88 (m, 4H), 2.38 (t,  $J$  = 7.0 Hz, 2H), 2.35 (t,  $J$  = 5.8 Hz, 2H), 2.22-2.19 (m, 2H), 1.80-1.57 (m, 8H);  $^{13}\text{C}$  NMR (100 MHz,  $\text{CDCl}_3$ )  $\delta$  196.3, 163.2, 154.8, 141.3, 126.1, 35.8, 33.5, 31.7, 27.6, 26.8, 25.2, 22.3, 21.8, 20.2; HRMS (EI,  $\text{H}^+$ ) for  $\text{C}_{14}\text{H}_{18}\text{O}$  calcd 202.1358, found:  $m/z$  202.1355. **6j**:  $R_f$  0.70 (hexane:EtOAc 4:1); IR (microscope) 2928, 2856, 1729, 1650, 1620, 1610, 1588, 1449, 1365, 1297, 1168, 1001, 981  $\text{cm}^{-1}$ ;  $^1\text{H}$  NMR (400 MHz,  $\text{CDCl}_3$ )  $\delta$  7.28 (d,  $J$  = 16.0 Hz, 1H), 6.78-6.76 (m, 1H), 6.60 (d,  $J$  = 15.6 Hz, 1H), 6.24 (s, 1H), 2.67-2.57 (m, 4H), 2.24-2.20 (m, 4H), 1.96 (quintet,  $J$  = 7.6 Hz, 2H), 1.78-1.62 (m, 4H);  $^{13}\text{C}$  NMR (100 MHz,  $\text{CDCl}_3$ )  $\delta$  188.7, 146.9, 145.7, 142.5, 139.4, 135.3, 119.2, 34.0, 31.1, 29.6, 26.6, 24.3, 22.8, 22.1; HRMS (EI,  $\text{M}^+$ ) for  $\text{C}_{14}\text{H}_{18}\text{O}$  calcd 202.1358, found:  $m/z$  202.1348.

**2-((3R,3aS,5R)-2,3,3a,4,5,6-Hexahydro-1-oxo-3-phenyl-1H-inden-5-yl)propan-2-yl 2,2,2-trifluoroacetate (9k).**

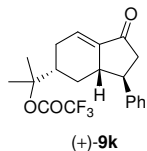

As described for the synthesis of siloxyallene **3a**, compound **2k** (1.41 mmol, 516 mg) in 5 mL ether was reacted with KO<sup>t</sup>-Bu (2.12 mmol, 237 mg) followed by workup as described above to give crude **3k**. The desired Nazarov product was then prepared according to the previous procedure using trifluoroacetic acid (4.23 mmol, 315  $\mu$ L) to afford **9k** (193 mg, yield 45%):  $R_f$  0.36 (hexane:EtOAc 4:1); IR (microscope) 3062, 3030, 2924, 1776, 1721, 1660, 1602, 1454, 1422, 1392, 1372, 1218, 1166, 1134, 776, 700  $\text{cm}^{-1}$ ;  $^1\text{H}$  NMR (400 MHz,  $\text{CDCl}_3$ )  $\delta$  7.40-7.37 (m, 2H), 7.31-7.29 (m, 3H), 6.78 (app. q,  $J$  = 2.0 Hz, 1H), 2.85 (ddd,  $J$  = 12.6, 10.5, 7.0 Hz, 1H), 2.80-2.77 (m, 1H), 2.72 (dd,  $J$  = 17.9, 7.0 Hz, 1H), 2.57 (dd,  $J$  = 18.2, 12.6 Hz, 1H), 2.43 (app. dq,  $J$  = 19.6, 4.2 Hz, 1H), 2.25 (app. tdd,  $J$  = 11.9, 4.9, 2.1 Hz, 1H), 2.21-2.15 (m, 1H), 2.03 (ddd,  $J$  = 11.9, 4.9, 2.1 Hz, 1H), 1.59 (s, 3H), 1.55 (s, 3H), 1.07 (app. td,  $J$  = 12.6, 11.2 Hz, 1H);  $^{13}\text{C}$  NMR (100 MHz,  $\text{CDCl}_3$ )  $\delta$  203.4, 156.0 (q,  $J$  = 40.9 Hz), 141.0, 140.0, 131.2, 128.8, 127.0, 127.0, 114.3 (q,  $J$  = 285.4 Hz), 90.5, 47.8, 46.5, 45.9, 42.7, 28.1, 26.7, 23.3, 22.7;  $^{19}\text{F}$  NMR (376 MHz,  $\text{CDCl}_3$ )  $\delta$  -76.0; HRMS (EI,  $[\text{M}-\text{CF}_3\text{CO}_2\text{H}]^+$ ) for  $\text{C}_{18}\text{H}_{20}\text{O}$  calcd 252.1514, found:  $m/z$  252.1512;  $[\alpha]_D^{25}$ : +67.16° (c 2.87,  $\text{CHCl}_3$ ).

**2-((1R,6R,7aS)-1-Hexyl-2,3,5,6,7,7a-hexahydro-3-oxo-1H-inden-6-yl)propan-2-yl 2,2,2-trifluoroacetate (9l) and 5l.**

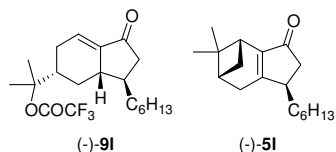

As described for the synthesis of siloxyallene **3a**, compound **2I** (0.14 mmol, 52 mg) in 3 mL ether was reacted with *KOt*-Bu (0.21 mmol, 23 mg) followed by workup as described above to give crude **3I**. The desired Nazarov product was then prepared according to the previous procedure using trifluoroacetic acid (0.42 mmol, 31  $\mu$ L) to afford **9I** (7 mg, yield 13%) and **5I** (9 mg, yield 25%). **9I**:  $R_f$  0.41 (hexane:EtOAc 4:1); IR (film) 2955, 2926, 2856, 1778, 1722, 1660, 1466, 1372, 1219, 1167, 1125, 1167, 1125, 777  $\text{cm}^{-1}$ ;  $^1\text{H}$  NMR (400 MHz,  $\text{CDCl}_3$ )  $\delta$  6.63 (dt,  $J = 4.0, 3.0$  Hz, 1H), 2.50 (dd,  $J = 18.0, 6.9$  Hz, 1H), 2.39-2.30 (m, 1H), 2.27-2.17 (m, 3H), 2.14-2.08 (m, 1H), 1.94 (dd,  $J = 18.0, 12.0$  Hz, 1H), 1.71-1.62 (m, 2H), 1.61 (s, 3H), 1.59 (s, 3H), 1.39-1.25 (m, 9H), 1.04-0.94 (m, 1H), 0.89-0.87 (m, 3H);  $^{13}\text{C}$  NMR (100 MHz,  $\text{CDCl}_3$ )  $\delta$  204.8, 156.1 (q,  $J = 41.2$  Hz), 141.8, 130.1, 114.4 (q,  $J = 285.0$  Hz), 90.8, 45.0, 44.9, 42.8, 42.0, 34.1, 31.7, 29.4, 28.6, 28.0, 26.8, 22.9, 22.8, 22.5, 14.0;  $^{19}\text{F}$  NMR (376 MHz,  $\text{CDCl}_3$ )  $\delta$  -76.0; HRMS (EI,  $[\text{M}-\text{CF}_3\text{CO}_2\text{H}]^+$ ) for  $\text{C}_{18}\text{H}_{28}\text{O}$  calcd 260.2140, found:  $m/z$  260.2136;  $[\alpha]_D^{25}$ : -44.56 $^\circ$  (c 0.35,  $\text{CHCl}_3$ ). **5I**:  $R_f$  0.50 (hexane:EtOAc 4:1); IR (film) 2954, 2927, 2857, 1695, 1625, 1466, 1416, 1385, 1239, 1168  $\text{cm}^{-1}$ ;  $^1\text{H}$  NMR (400 MHz,  $\text{CDCl}_3$ )  $\delta$  2.76-2.68 (m, 1H), 2.68-2.61 (m, 2H), 2.54 (app. dt,  $J = 9.0, 2.7$  Hz, 1H), 2.47 (br d,  $J = 18.8$  Hz, 1H), 2.25 (app. tt,  $J = 5.6, 2.8$  Hz, 1H), 2.17 (dd,  $J = 19.2, 2.0$  Hz, 1H), 1.82-1.73 (m, 2H), 1.69-1.57 (m, 4H), 1.36 (s, 3H), 1.36-1.26 (m, 5H), 1.05 (d,  $J = 9.0$  Hz, 1H), 0.93-0.87 (m, 3H), 0.71 (s, 3H);  $^{13}\text{C}$  NMR (100 MHz,  $\text{CDCl}_3$ )  $\delta$  205.4, 175.9, 148.8, 42.8, 41.0, 40.6, 37.1, 33.7, 32.4, 31.9, 31.7, 29.3, 28.3, 25.8, 22.5, 20.9, 14.0 [One aliphatic carbon signal is missing due to peak overlap.]; HRMS (EI,  $\text{M}^+$ ) for  $\text{C}_{18}\text{H}_{28}\text{O}$  calcd 260.2140, found:  $m/z$  260.2143;  $[\alpha]_D^{25}$ : -8.62 $^\circ$  (c 0.21,  $\text{CHCl}_3$ ).

Preparation of ester **11** from enone **4a** for 2D TROESY study.

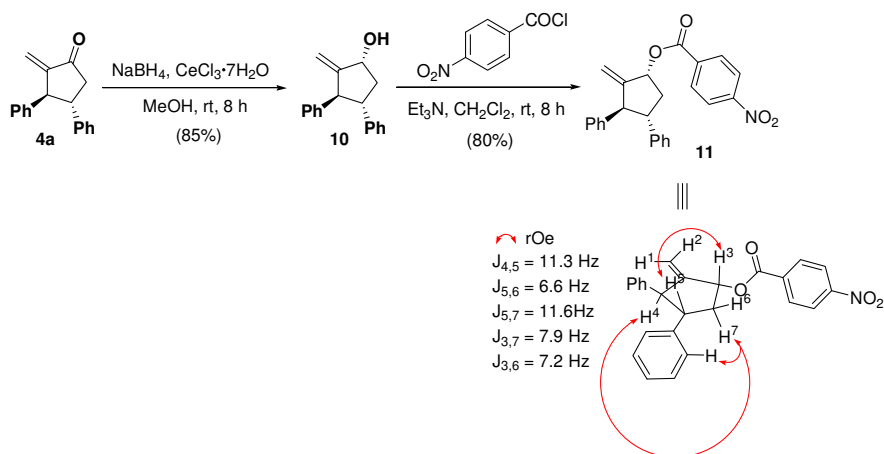

**Alcohol 10**: To a solution of **4a** (0.06 mmol, 15 mg) and cerium (III) chloride heptahydrate (0.06

mmol, 22 mg) in 3 mL MeOH was added NaBH<sub>4</sub> (0.06 mmol, 3 mg) at room temperature. The mixture was stirred for 8 h then quenched by adding saturated NH<sub>4</sub>Cl solution. The organic layer was separated and washed with brine, dried over anhydrous MgSO<sub>4</sub>, filtered and concentrated under reduced pressure. The crude mixture was purified by flash column chromatography (hexane:EtOAc 2:1) to provide the alcohol as a single diastereomer (13 mg, yield 85%): R<sub>f</sub> 0.25 (hexane:EtOAc 4:1); IR (microscope) 3411 (br s), 3063, 3028, 2959, 2923, 2857, 1661, 1602, 1469, 1452, 1328, 1211, 1087, 1076, 914, 905, 761, 699 cm<sup>-1</sup>; <sup>1</sup>H NMR (400 MHz, CDCl<sub>3</sub>) δ 7.26-7.21 (m, 3H), 7.20-7.15 (m, 3H), 7.11-7.08 (m, 2H), 7.05-7.02 (m, 2H), 5.33 (app. t, *J* = 2.4 Hz, 1H), 4.86-4.81 (m, 2H), 3.81 (app. dq, *J* = 10.8, 2.6 Hz, 1H), 3.09 (ddd, *J* = 12.4, 11.2, 6.0 Hz, 1H), 2.61 (ddd, *J* = 12.4, 6.4, 6.4 Hz, 1H), 1.95 (ddd, *J* = 12.4, 12.4, 9.6 Hz, 1H) 1.82 (br s, 1H); <sup>13</sup>C NMR (100 MHz, CDCl<sub>3</sub>) δ 158.0, 142.6, 141.9, 128.4, 128.3, 128.2, 127.3, 126.5, 126.3, 110.1, 74.7, 57.2, 50.0, 42.7; HRMS (EI, M<sup>+</sup>) for C<sub>18</sub>H<sub>18</sub>O calcd 250.1358, found: m/z 250.1358.

***p*-Nitrobenzoate 11:** To a solution of **10** (0.032 mmol, 8 mg) and triethylamine (0.096 mmol, 13 μL) in 3 mL CH<sub>2</sub>Cl<sub>2</sub> was added 4-nitrobenzoyl chloride (0.035 mmol, 7 mg) at room temperature. The mixture was stirred for 8 h then quenched by adding 5 mL water and CH<sub>2</sub>Cl<sub>2</sub> (10 mL). The organic layer was separated and washed with brine, dried over anhydrous MgSO<sub>4</sub>, filtered and concentrated under reduced pressure. The crude mixture was purified by flash column chromatography (hexane:EtOAc 5:1) to provide **11** (10 mg, 80%): R<sub>f</sub> 0.60 (hexane:EtOAc 4:1); IR (microscope) 3109, 3085, 3061, 3029, 1724, 1605, 1528, 1347, 1273, 1119, 1103 cm<sup>-1</sup>; <sup>1</sup>H NMR (400 MHz, CDCl<sub>3</sub>) δ 8.36–8.33 (m, 2H), 8.32-8.29 (m, 2H), 7.30-7.26 (m, 4H), 7.24-7.20 (m, 2H), 7.17-7.11 (m, 4H), 6.11 (app. td, *J* = 7.2, 2.2 Hz, 1H), 5.41 (dd, *J* = 3.0, 2.2 Hz, 1H), 4.92 (t, *J* = 2.6 Hz, 1H), 3.92 (app. dq, *J* = 11.0, 2.6 Hz, 1H), 3.28 (app. td, *J* = 11.6, 6.6 Hz, 1H), 2.88 (app. dt, *J* = 12.8, 7.2 Hz, 1H), 2.21 (app. td, *J* = 12.6, 8.6 Hz, 1H); <sup>13</sup>C NMR (100 MHz, CDCl<sub>3</sub>) δ 164.8, 153.0, 150.8, 141.6, 141.4, 135.9, 131.0, 128.8, 128.7, 128.6, 127.5, 127.0, 126.9, 123.8, 113.5, 77.5, 57.5, 50.7, 39.5; HRMS (EI, M<sup>+</sup>) for C<sub>25</sub>H<sub>21</sub>NO<sub>4</sub> calcd 399.1471, found: m/z 399.1466.

Yen-Ku, YKW-1-43  
 400.393 MHz <sup>1</sup>H ID in cdcl<sub>3</sub> (ref. to CDCl<sub>3</sub> @ 7.26 ppm), temp 27.0 C -> actual temp = 27.0 C, m400gz probe  
 Pulse Sequence: szpul

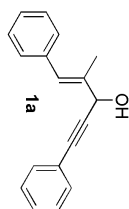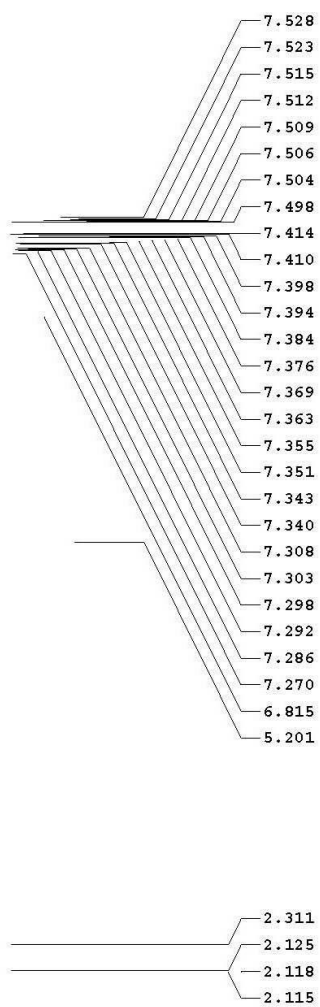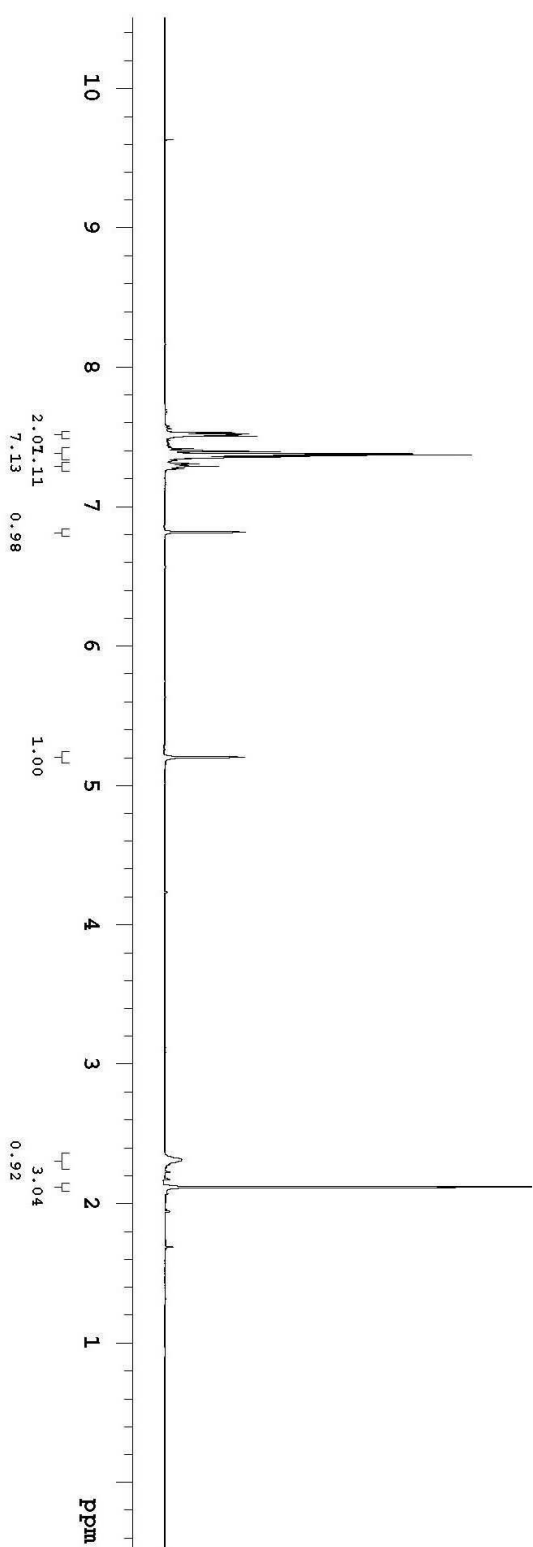





Yen-Ku, YKW-2-29-APT  
 400.393 MHz H1 ID in cdcl3 (ref. to CDCl3 @ 7.26 ppm), temp 27.0 C -> actual temp = 27.0 C, m400gz probe  
 Pulse Sequence: s2pul

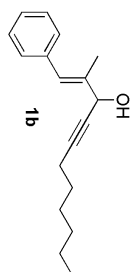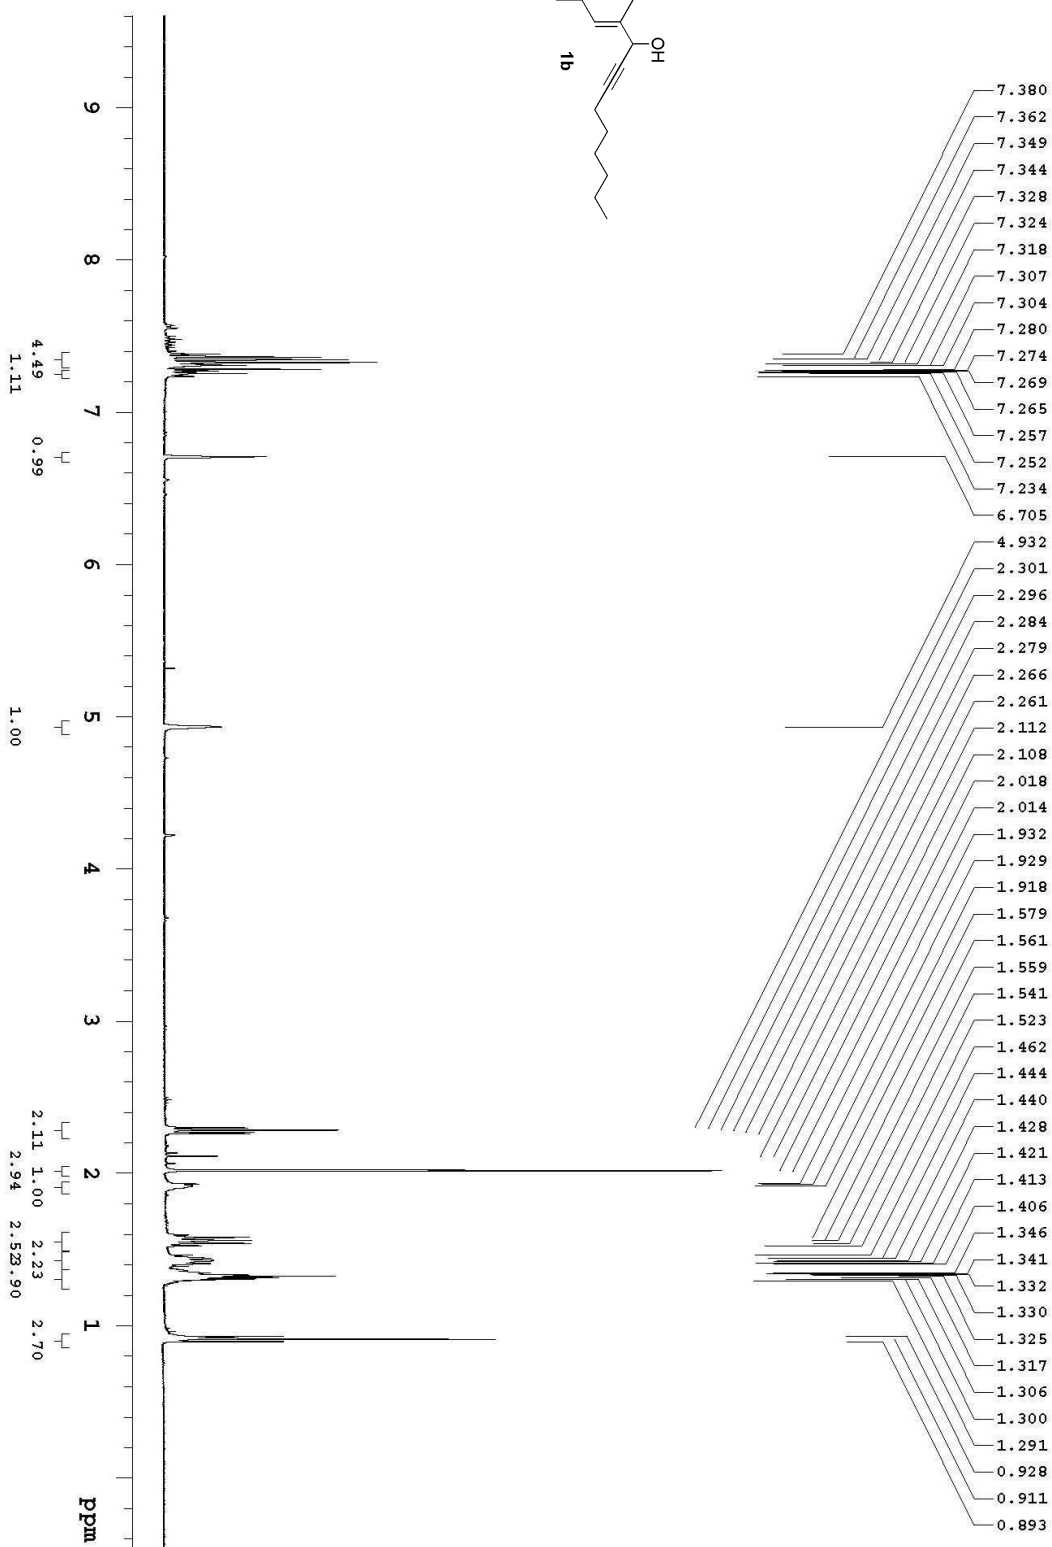

100.650 MHz C13 [H1] apt in cdcl3 (ref. to CDCl3 @ 77.06 ppm), temp 27.0 C -> actual temp = 27.0 C, m400gz probe  
 06:29\_06:29\_C13\_apt.fid  
 File: /mnt/d600/home13/westmr/mrdata/ten-Ku/2009.07/2009.07.9.m4\_XRM-2-29-APT\_06:29\_C13\_apt.fid  
 Spectrometer: d601  
 Pulse Sequence: apt

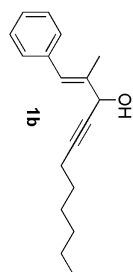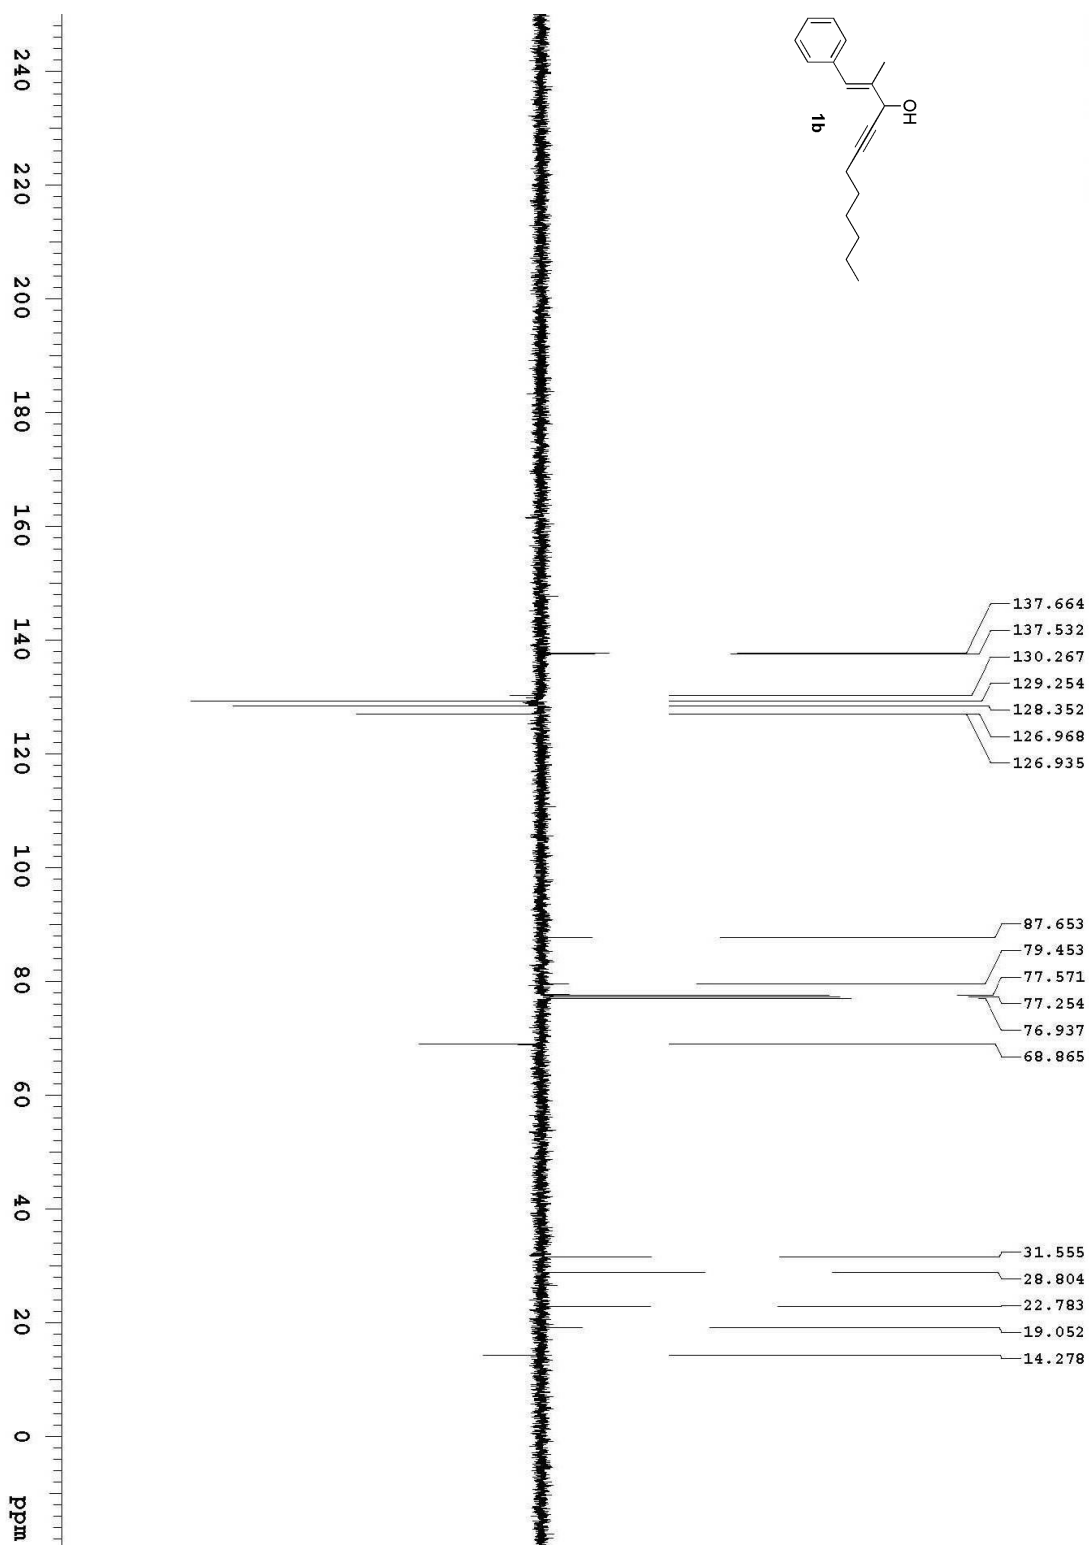

Yen-Ku, YKW-1-131-M4  
 400.393 MHz H1 ID in cdcl3 (ref. to CDCl3 @ 7.26 ppm), temp 27.0 C -> actual temp = 27.0 C, m400gz probe  
 Pulse Sequence: s2pml

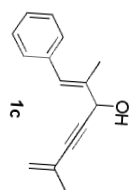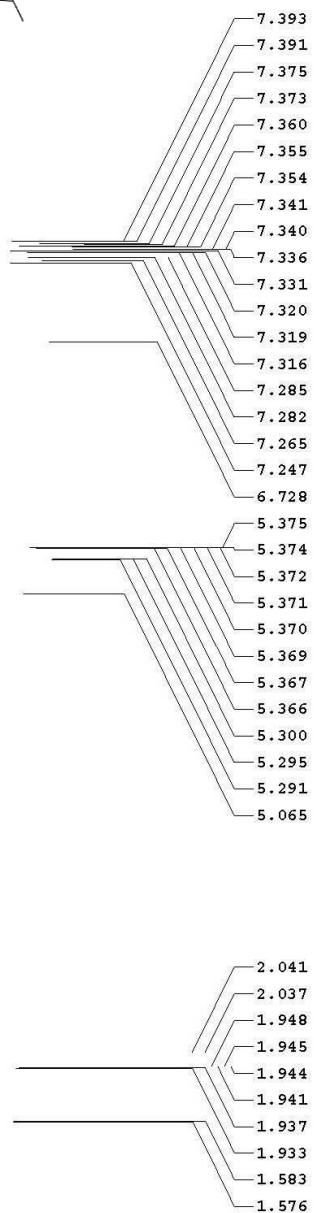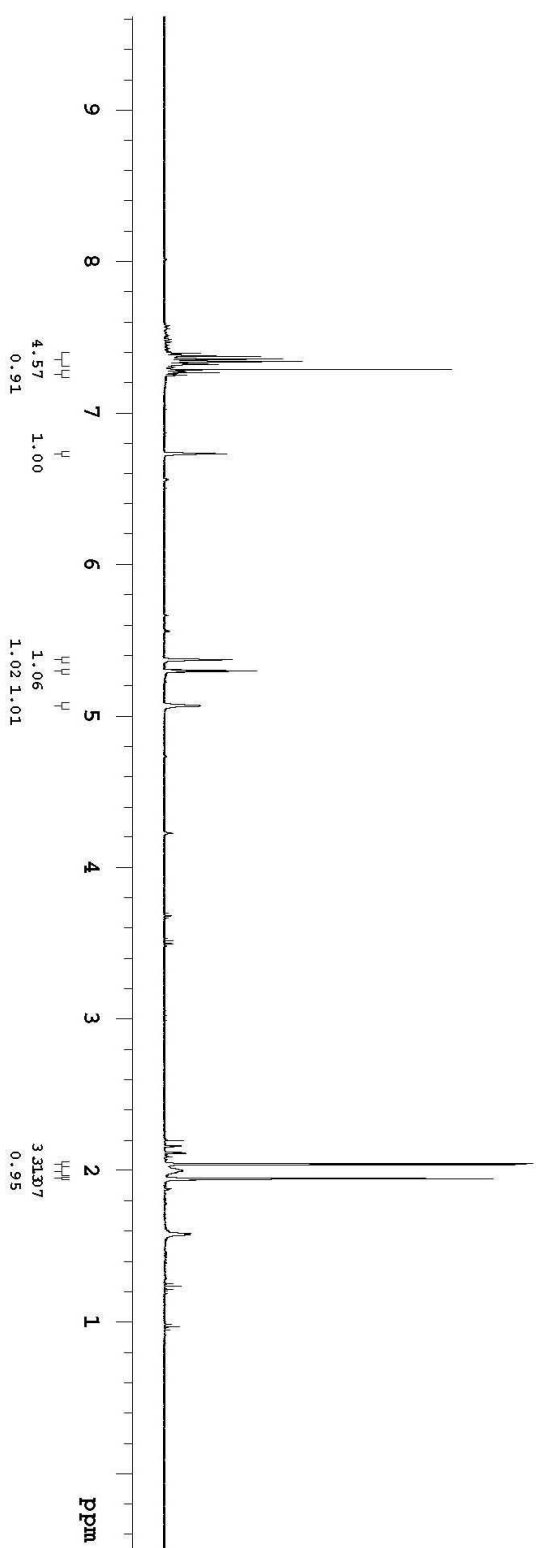

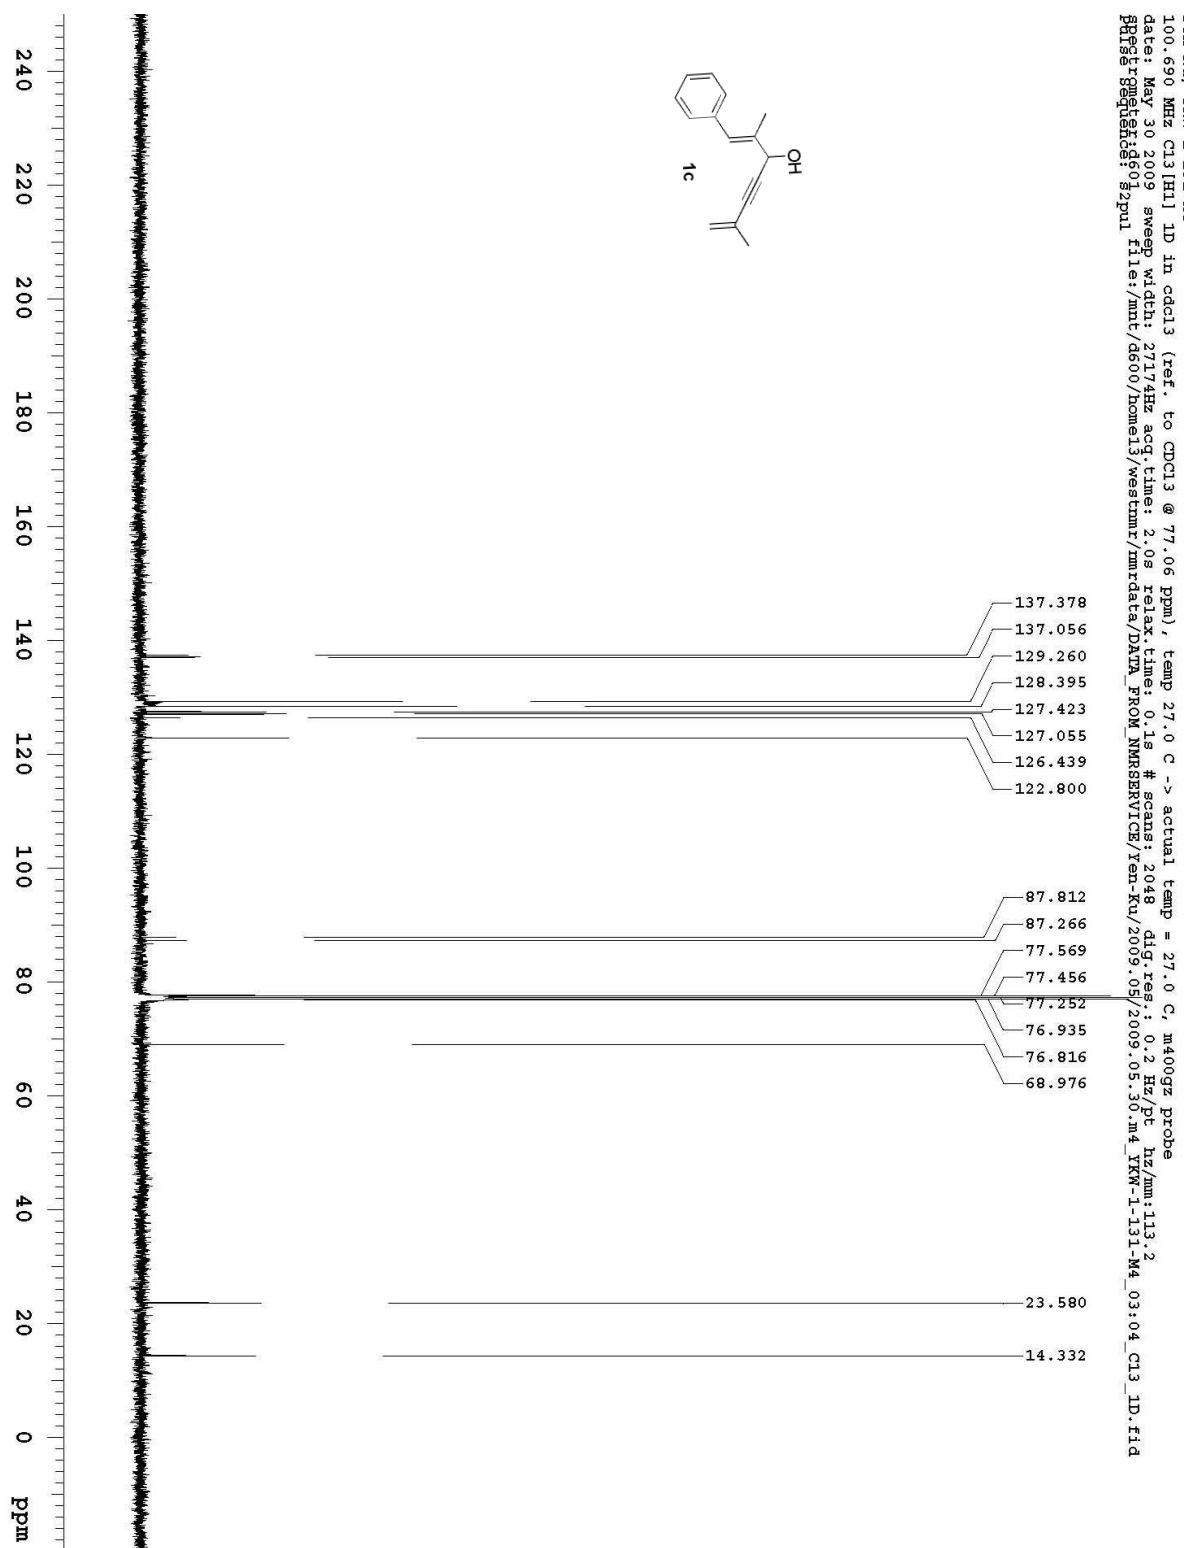

Yen-Ku, YKN-1-63-C  
 400.393 MHz <sup>1</sup>H NMR in CDCl<sub>3</sub> (ref. to CDCl<sub>3</sub> @ 7.26 ppm), temp 27.0 C -> actual temp = 27.0 C, m400gz probe  
 Pulse Sequence: s2pul

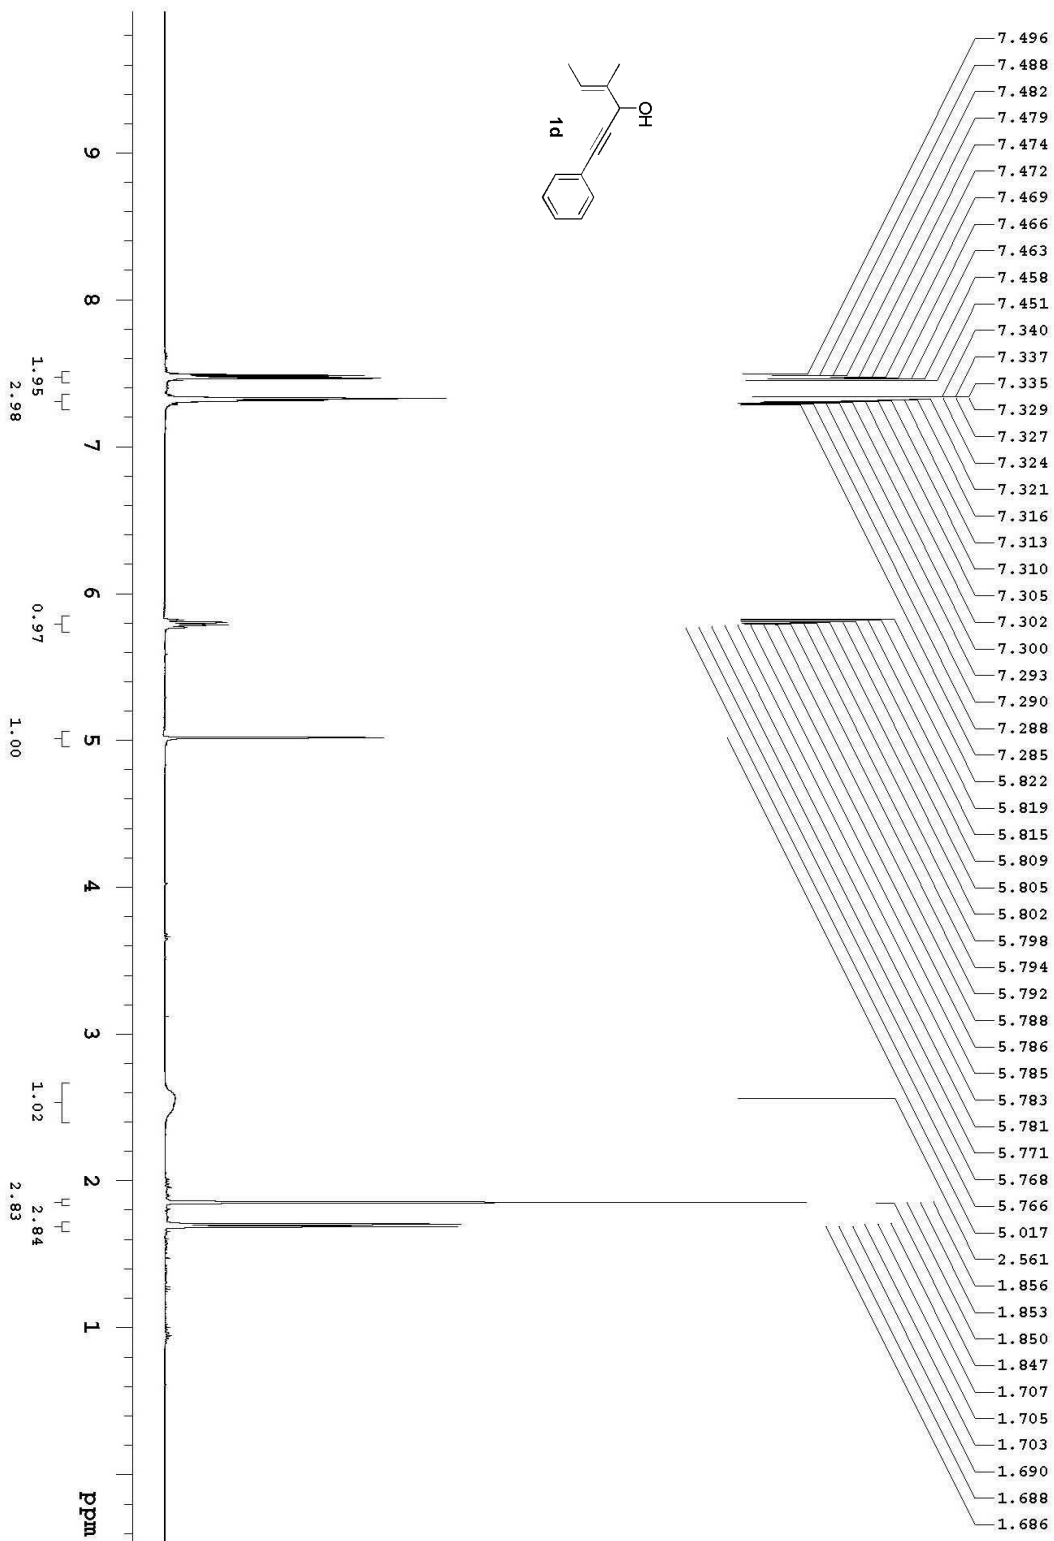



Yen-Ku, YKN-2-119-m4  
 400.393 MHz H1 1D in cdcl3 (ref. to CDCl3 @ 7.26 ppm), temp 27.0 C -> actual temp = 27.0 C, m400gz probe  
 Pulse Sequence: s2pul

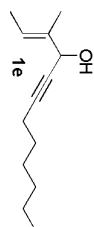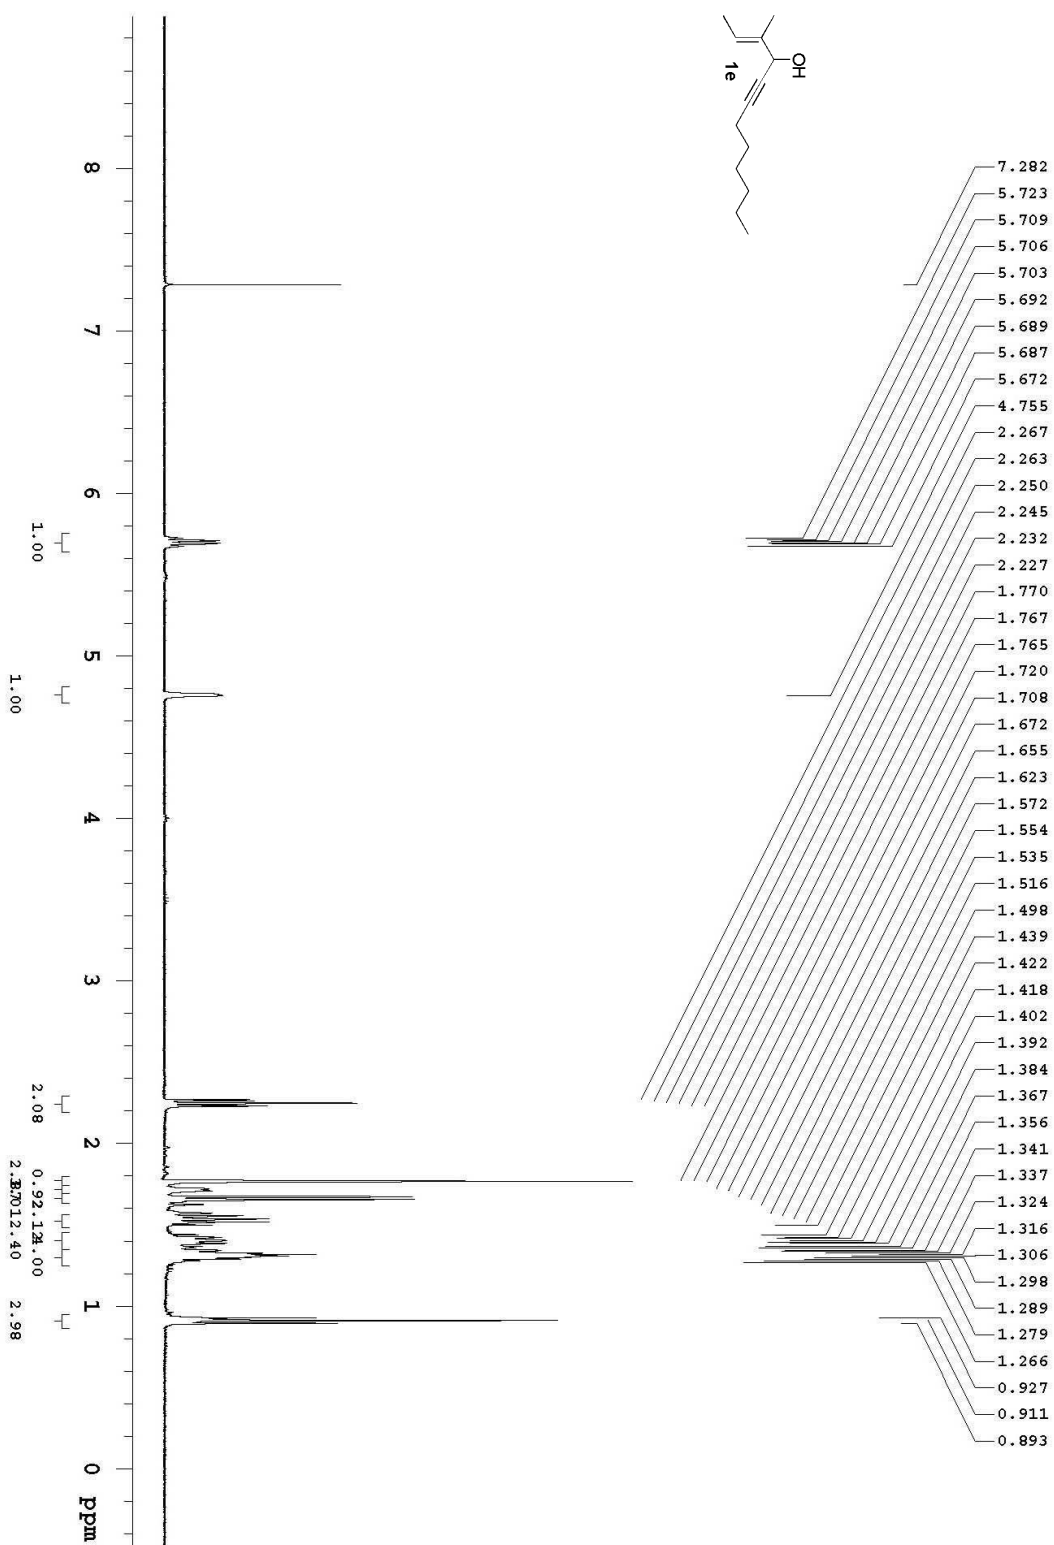

100.690 MHz C13[H1] 1D in cdcl3 (ref. to CDCl3 @ 77.06 ppm), temp 27.0 C -> actual temp = 27.0 C, m400gz probe  
 date: Aug 11 2009 sweep width: 27174Hz acq. time: 2.0s relax time: 0.1s # scans: 1024 dig. res.: 0.2 Hz/pt hz/mm: 113.2  
 prog: zgpg30 f2: 690 g2pul file: /mnt/d600/home13/westumr/umrdata/DATA\_FROM\_NMRSERVICE/Yen-Ku/2009.08/2009.08.11.m4\_1KM-2-119-m4\_13:07\_C13\_1D.fid

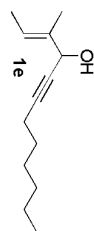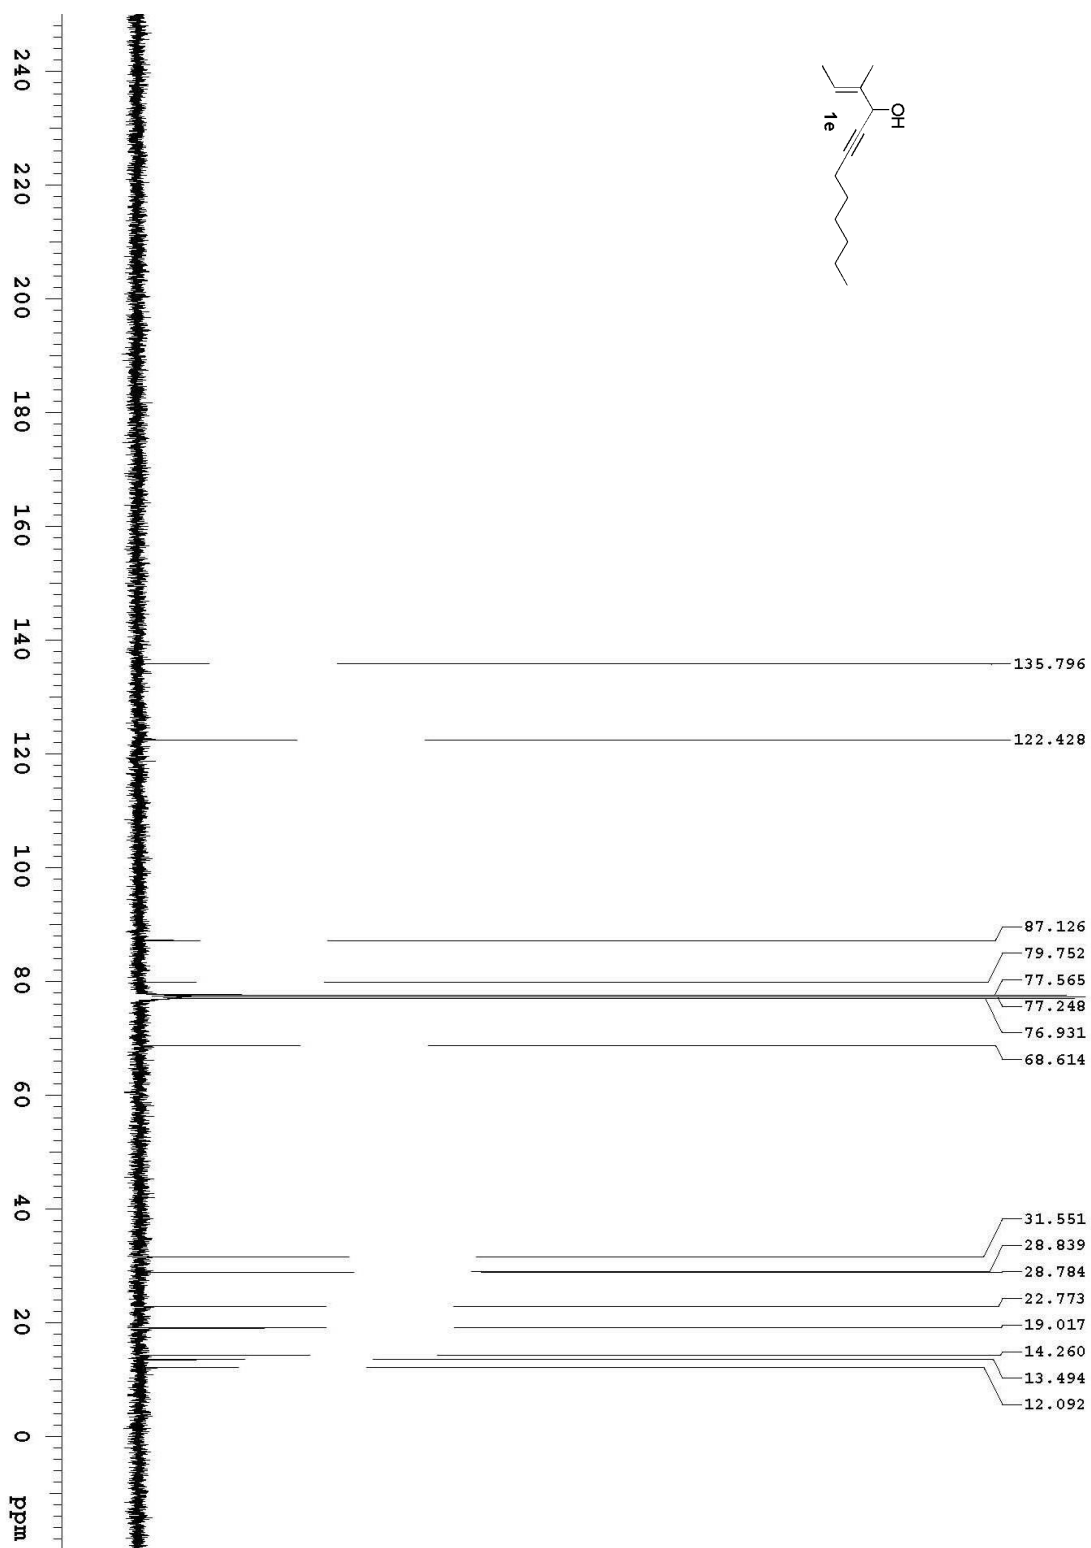



Yen-Ku, YKM-2-121-m4  
 400.393 MHz H1 1D in cdcl3 (ref. to CDCl3 @ 7.26 ppm), temp 27.0 C -> actual temp = 27.0 C, m400gz probe  
 Pulse Sequence: szpul

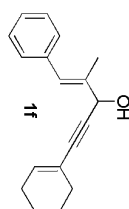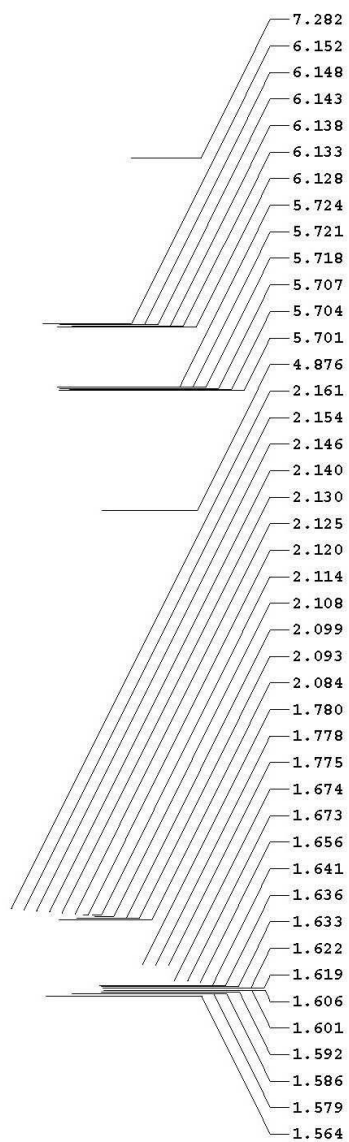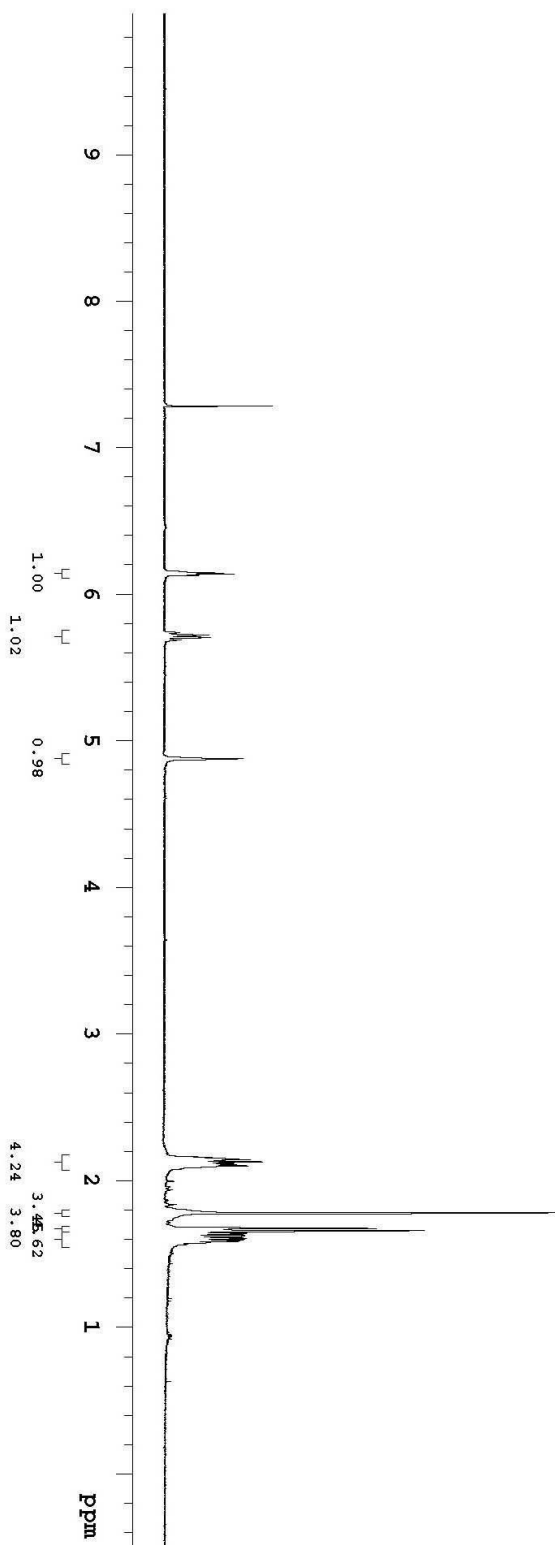

100.690 MHz <sup>13</sup>C{<sup>1</sup>H} 1D in cdcl<sub>3</sub> (ref. to CDCl<sub>3</sub> @ 77.06 ppm), temp 27.0 C -> actual temp = 27.0 C, m400gz probe  
 date: Aug 11 2009 sweep width: 27174Hz acq. time: 0.1s # scans: 1024 dig. res: 0.2 Hz/pt hz/mm: 113.2  
 prog: zgpg30 f2: 80.135 MHz f1: 101.625 MHz file: /mnt/d600/home13/westmr/1mrdata/DATA\_FROM\_NMRSERVICE/Yen-Ku/2009.08.11.m4\_1KM-2-121-m4\_1s:26\_C13\_1D.fid

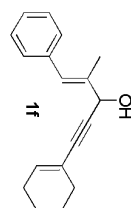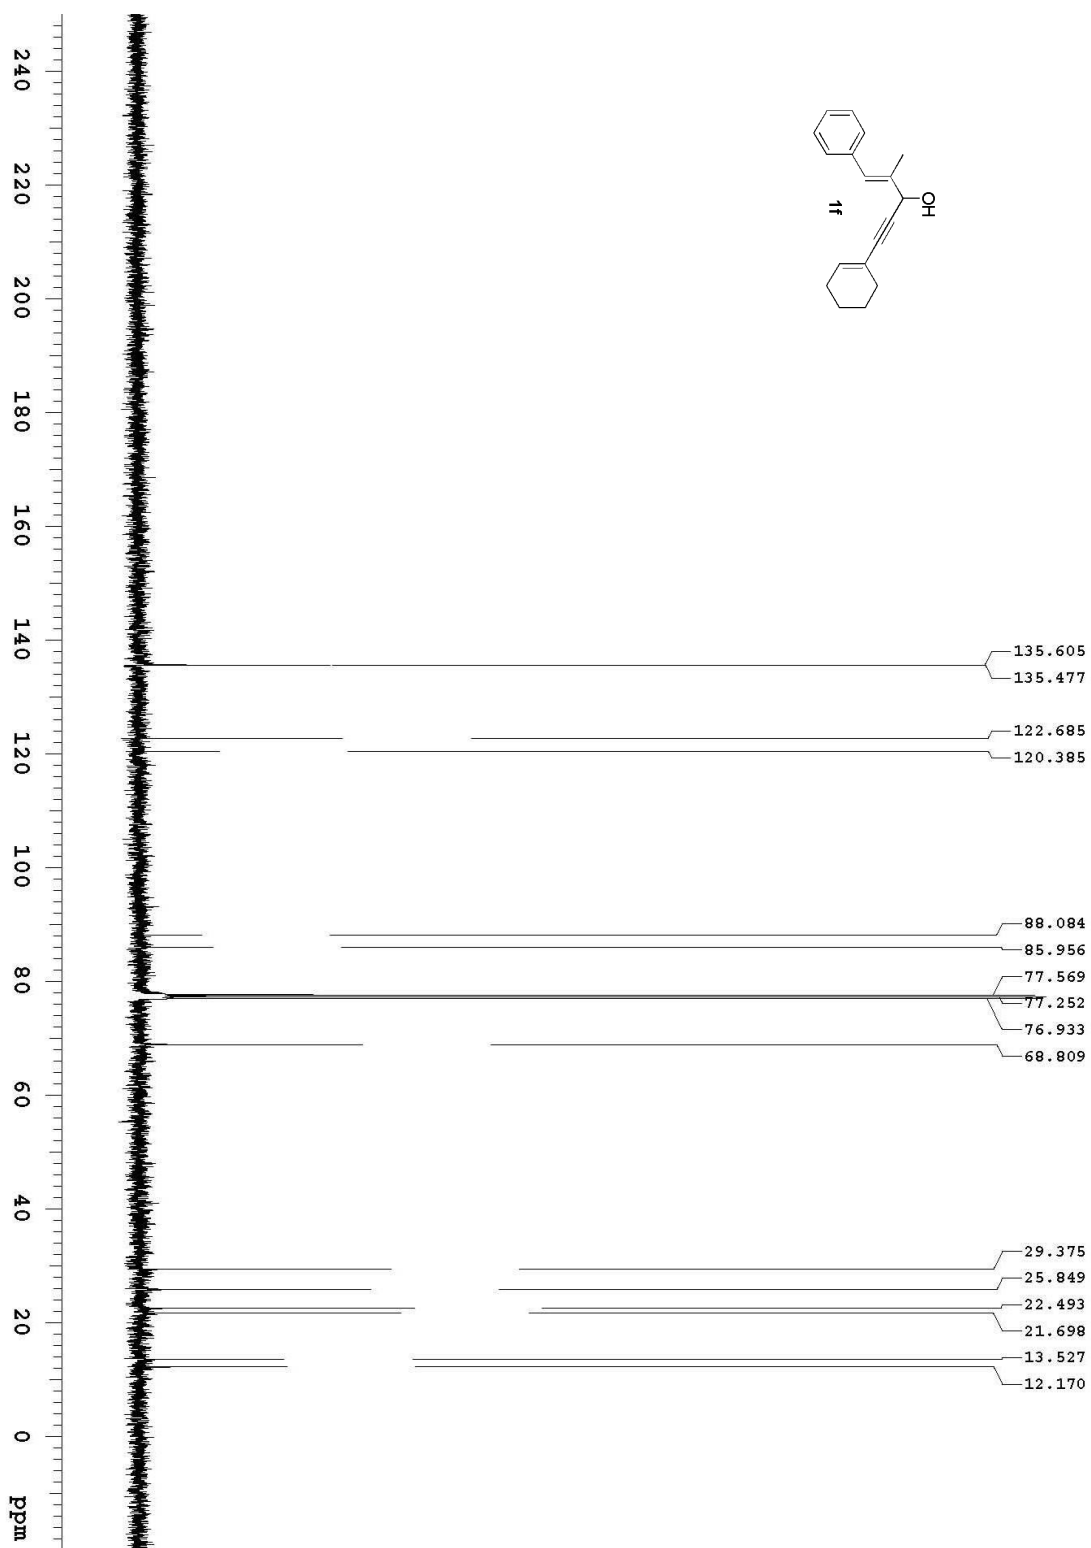

Yen-Ku, YKM-2-149-H1  
 400.393 MHz H1 1D in cdcl3 (ref. to CDCl3 @ 7.26 ppm), temp 27.0 C -> actual temp = 27.0 C, m400gz probe  
 Pulse Sequence: szpul

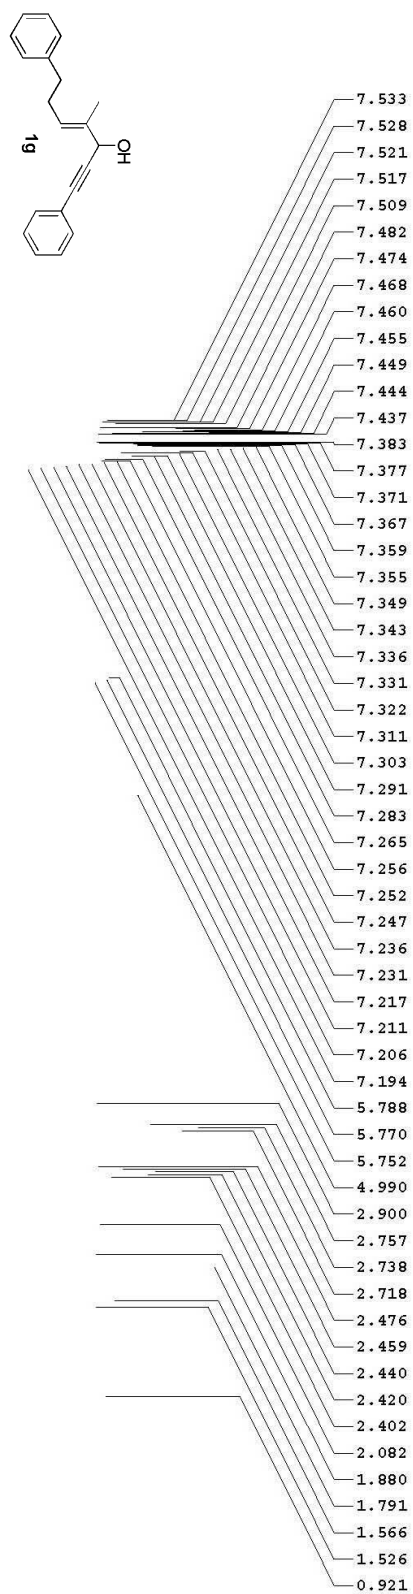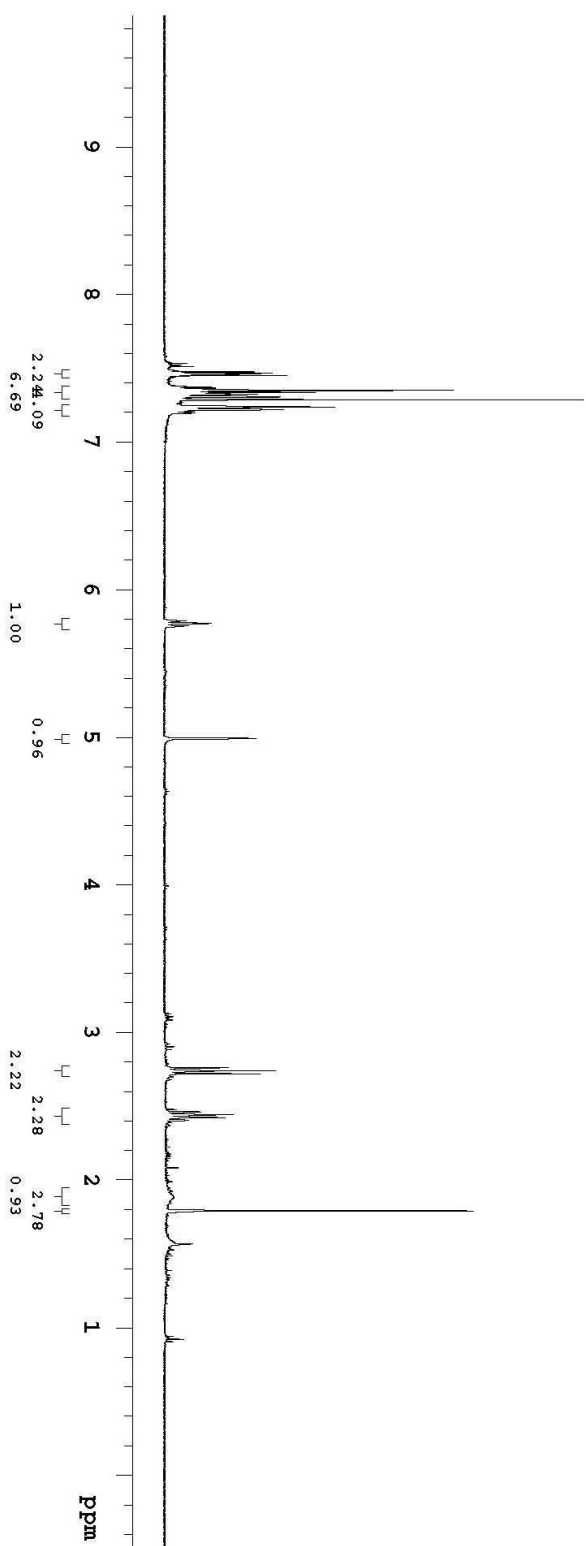

100.690 MHz <sup>13</sup>C{<sup>1</sup>H}] 1D in cdcl<sub>3</sub> (ref. to CDCl<sub>3</sub> @ 77.06 ppm), temp 27.0 C -> actual temp = 27.0 C, m400gz probe  
 date: Aug 24 2009 sweep width: 21744Hz acq.time: 2.0s relax.time: 0.1s # scans: 6000 dir: res.: 0.2 Hz/pt hz/mm: 113.2  
 file: /mnt/d600/home13/westlmr/mrdata/DAVA\_FROM\_NMRSERVICE/ten-Ku/2009.08/2009.08.24.m4\_1KW-2-149-CC\_20:05\_C13\_1D.fid

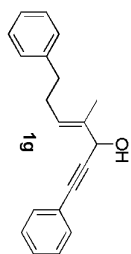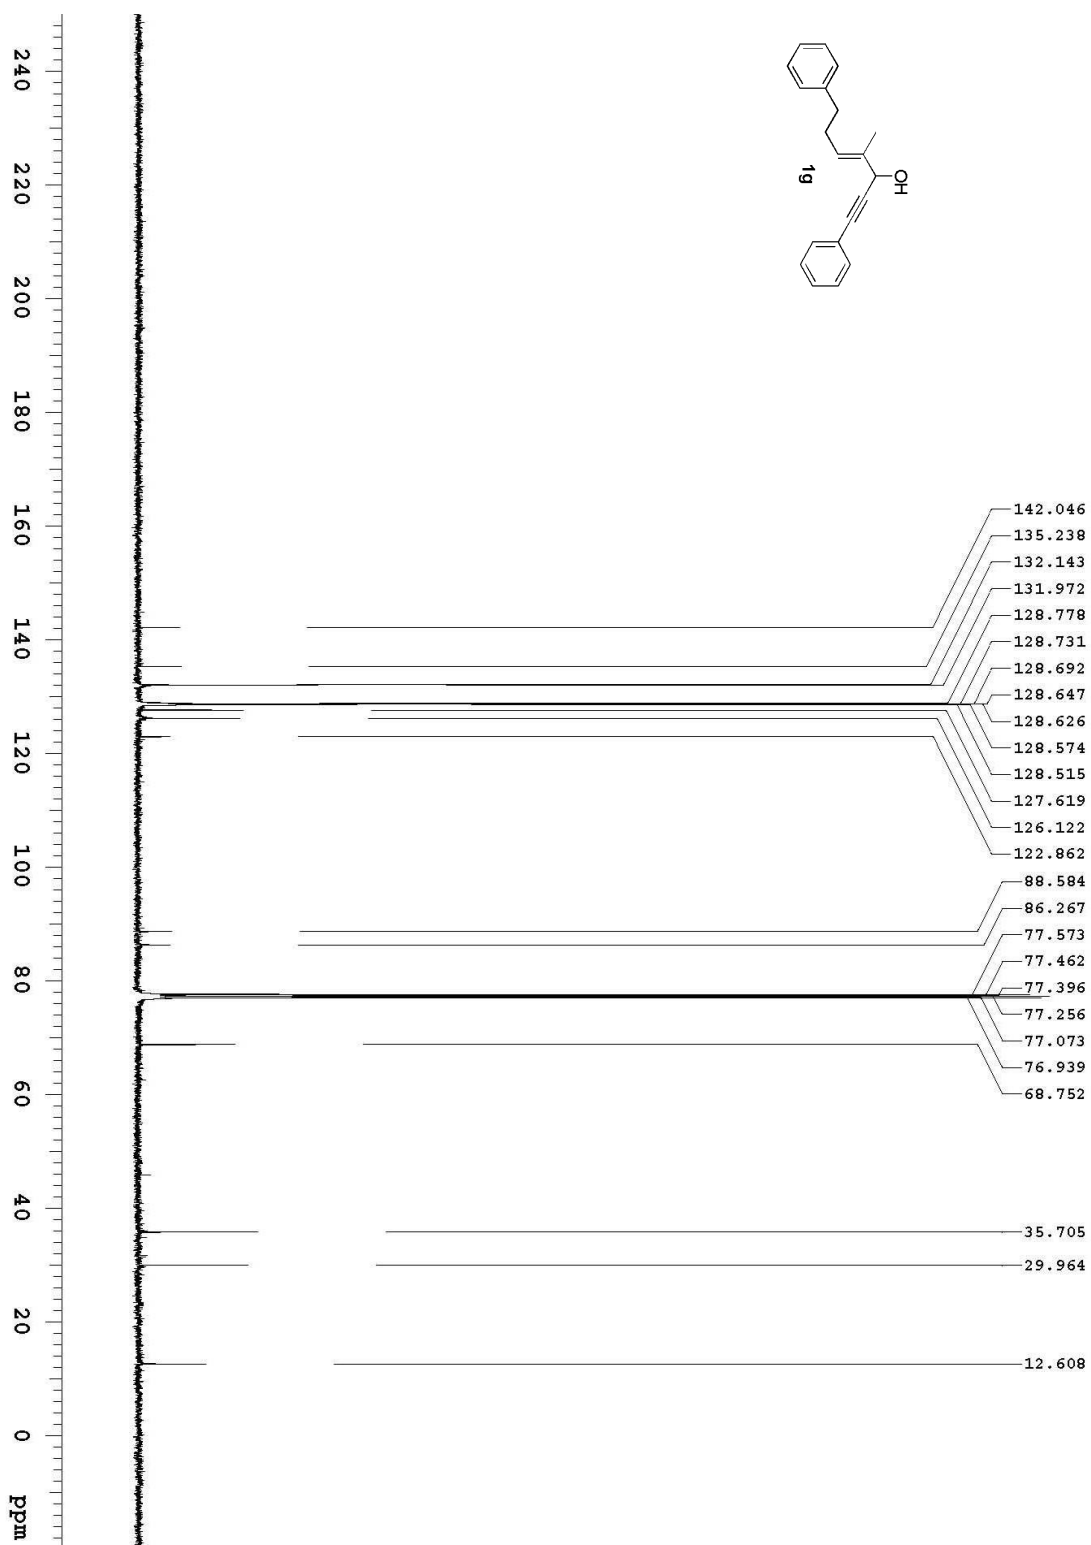

Yen-Ku, YKW-1-147  
 400.393 MHz H1 ID in cdcl3 (ref. to CDCl3 @ 7.26 ppm), temp 27.0 C -> actual temp = 27.0 C, m400gz probe  
 Pulse Sequence: szpul

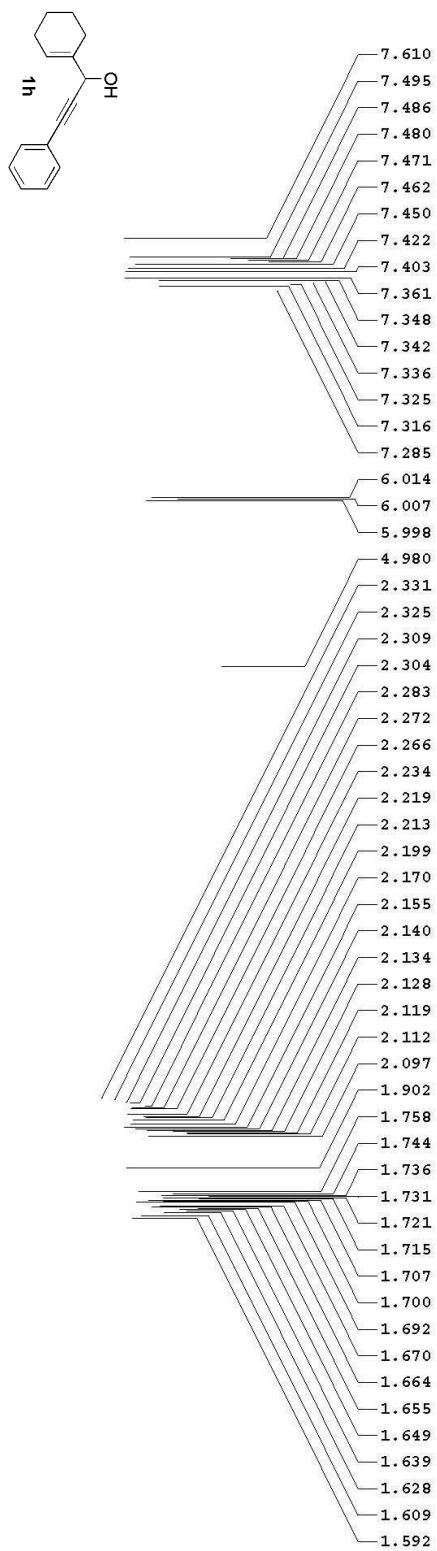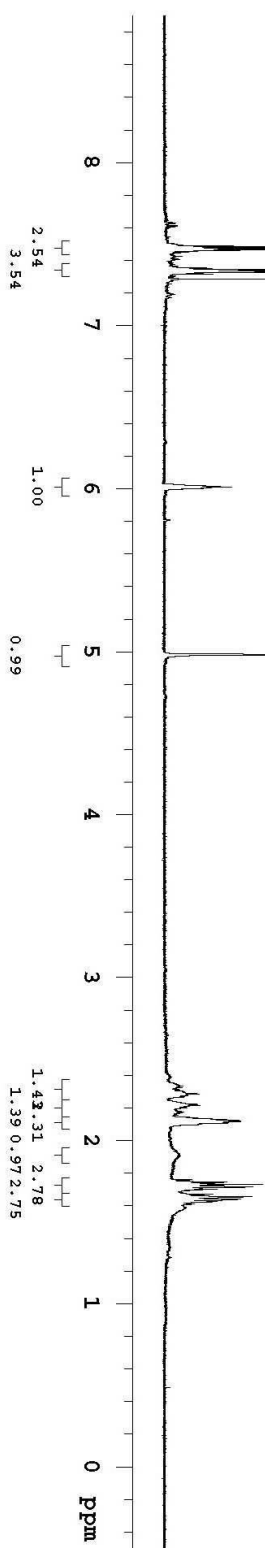

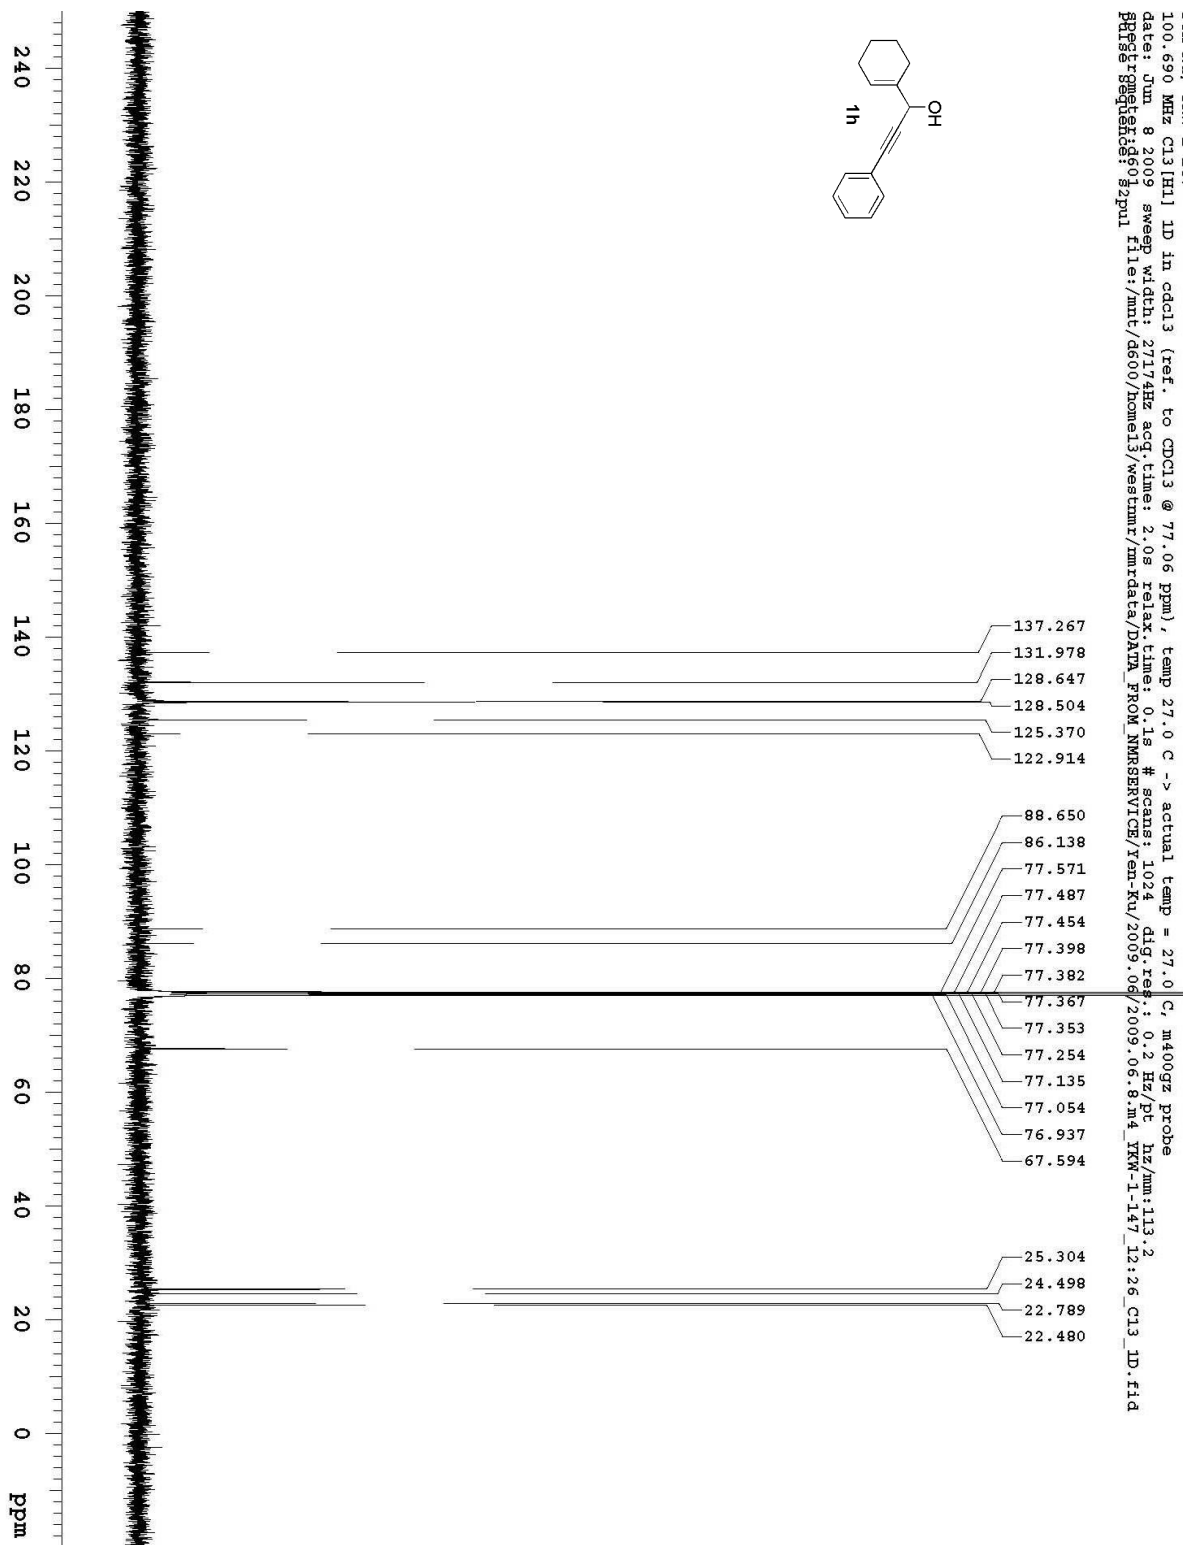

Yen-Ku, YKM-1-187-re  
 400.393 MHz H1 1D in cdcl3 (ref. to CDCl3 @ 7.26 ppm), temp 27.0 C -> actual temp = 27.0 C, m400gz probe  
 Pulse Sequence: szpul

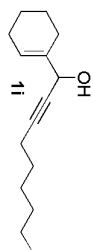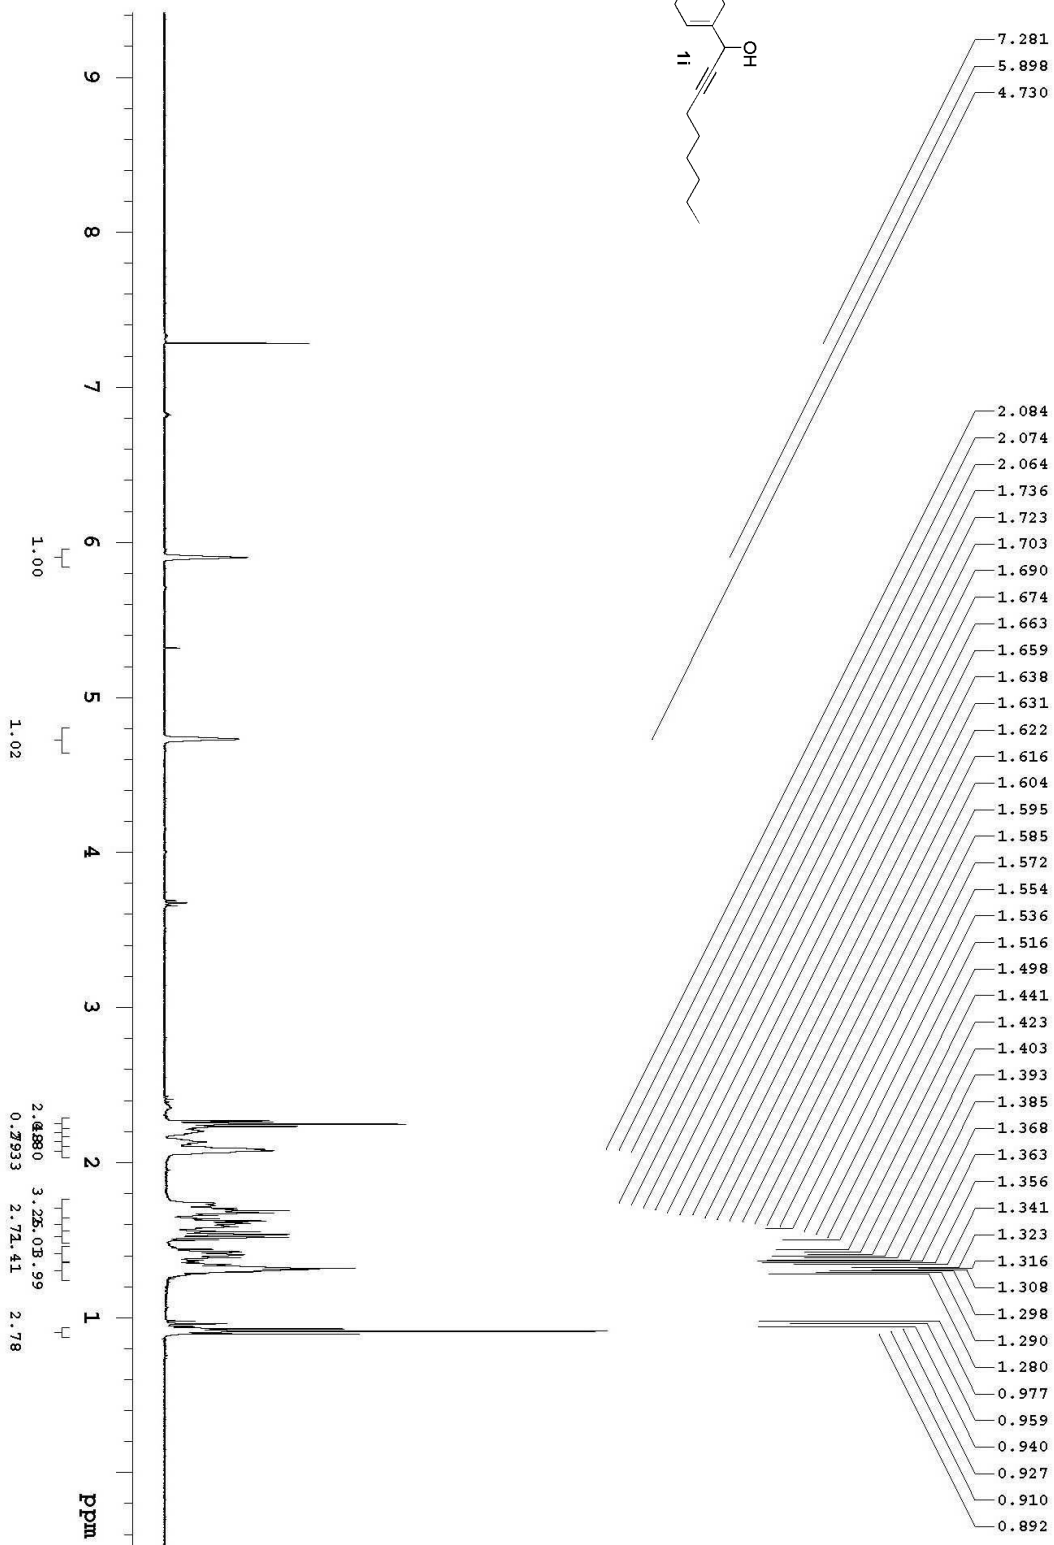

100.690 MHz  $^{13}\text{C}$  [H<sub>1</sub>] 1D in  $\text{cdcl}_3$  (ref. to  $\text{CDCl}_3$  @ 77.06 ppm), temp 27.0 C -> actual temp = 27.0 C, m400gz probe  
 date: Jun 16 2009 sweep width: 27174Hz acq. time: 2.0s relax. time: 0.1s # scans: 1024 dig. res.: 0.2 Hz/pt hz/mm: 113.2  
 prog: zgpg30 f1: mnt/d600/home13/westumt/tmldata/DAI4\_F00W\_NMRSERVICE/Yen-Ku/2009.06/2009.06.16\_m4\_1KW-1-187-re\_17:42\_13\_1D.fid

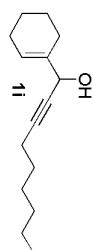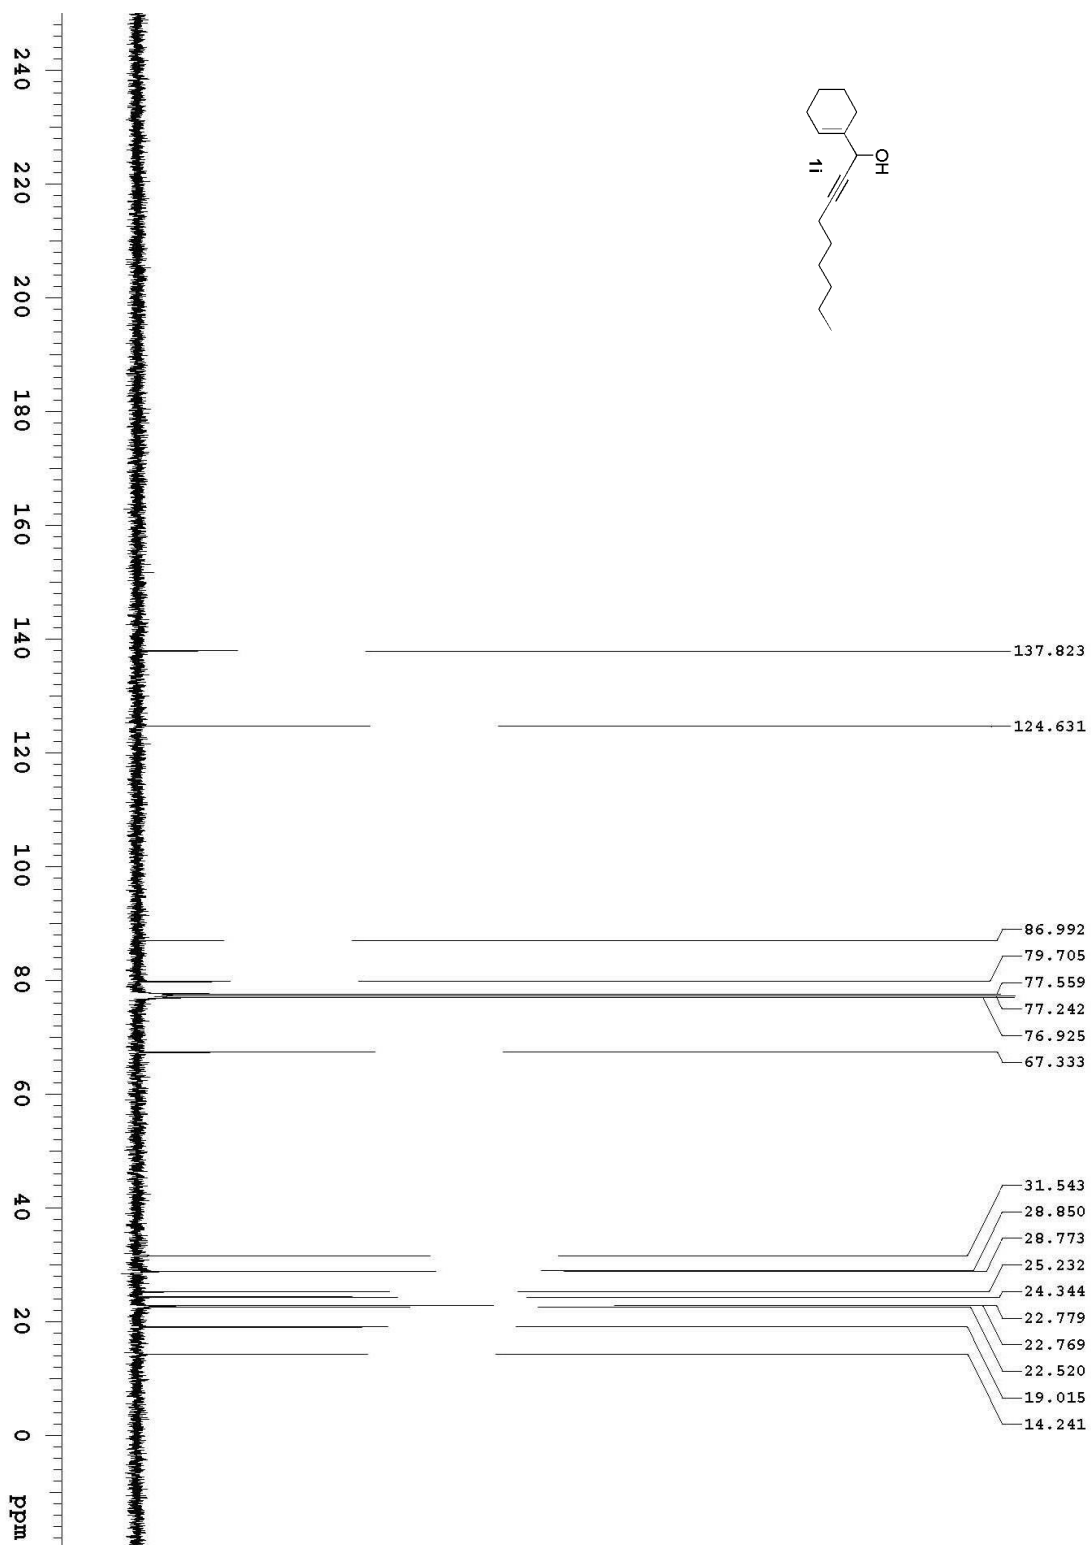



Yen-Ku, YKM-2-181-Re  
 400.393 MHz H1 1D in cdcl3 (ref. to CDCl3 @ 7.26 ppm), temp 27.0 C -> actual temp = 27.0 C, m400gz probe  
 Pulse Sequence: szpul

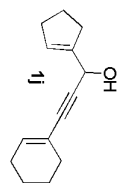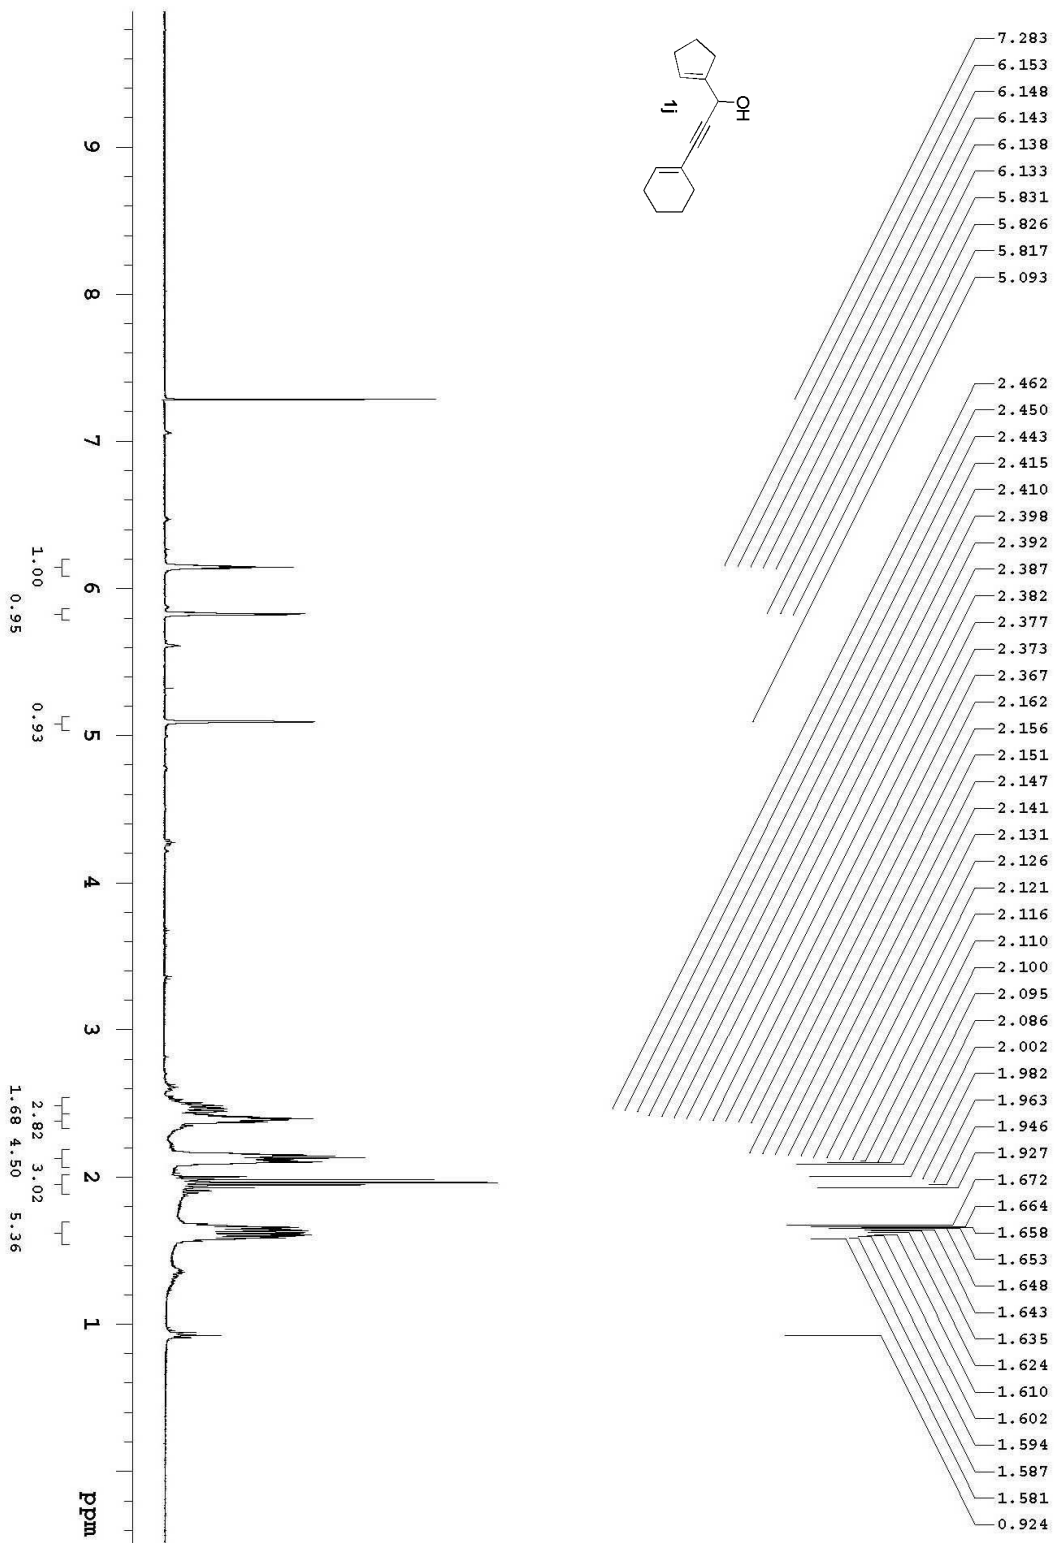

100.690 MHz <sup>13</sup>C{<sup>1</sup>H} 1D in cdcl<sub>3</sub> (ref. to CDCl<sub>3</sub> @ 77.06 ppm), temp 27.0 C -> actual temp = 27.0 C, m400gz probe  
 date: Sep 13 2009 sweep width: 27174Hz acq. time: 2.0s relax. time: 0.1s # scans: 1024 dig. res.: 0.2 Hz/pt hz/mm: 113.2  
 file: /mnt/d600/home13/westumr/1mdata/DATA\_FROM\_NMRSERVICE/Yen-Ku/2009.09/2009.09.13.m4\_1KM-2-181-Re\_02:53\_C13\_1D.fid

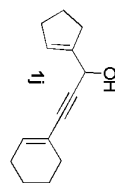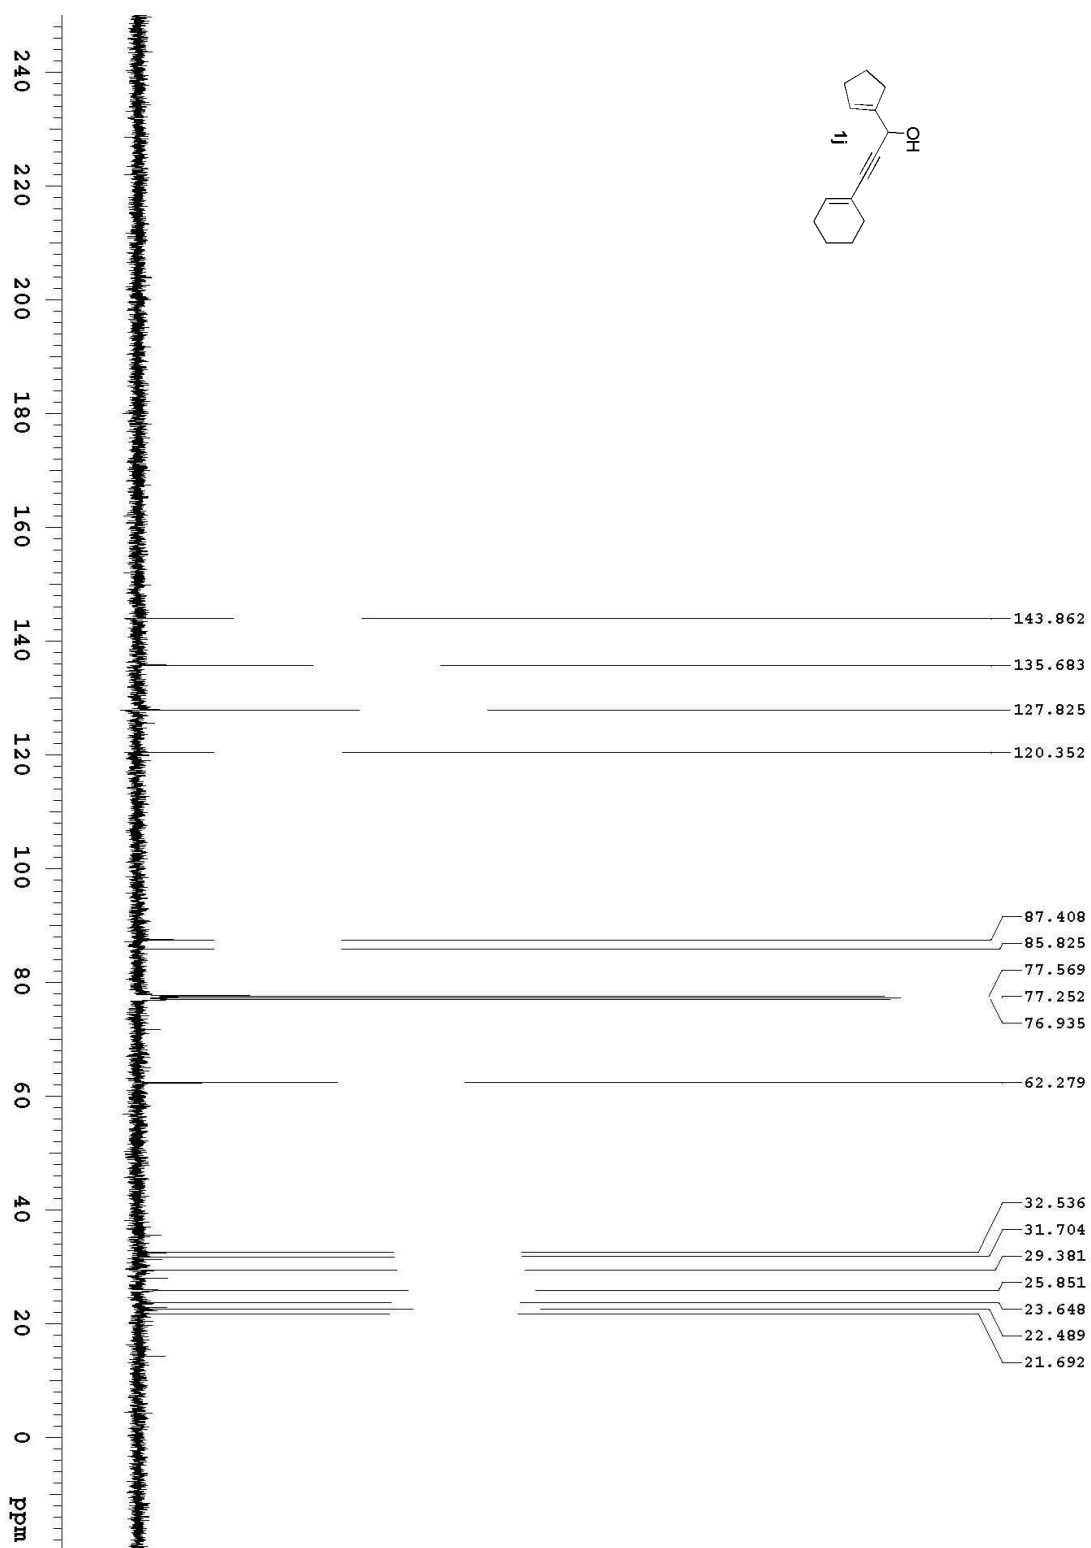

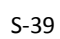

Chemical structure of compound **1k**: A cyclohexene ring substituted with a methyl group and a 1-phenylethynyl-2-hydroxyethyl group.

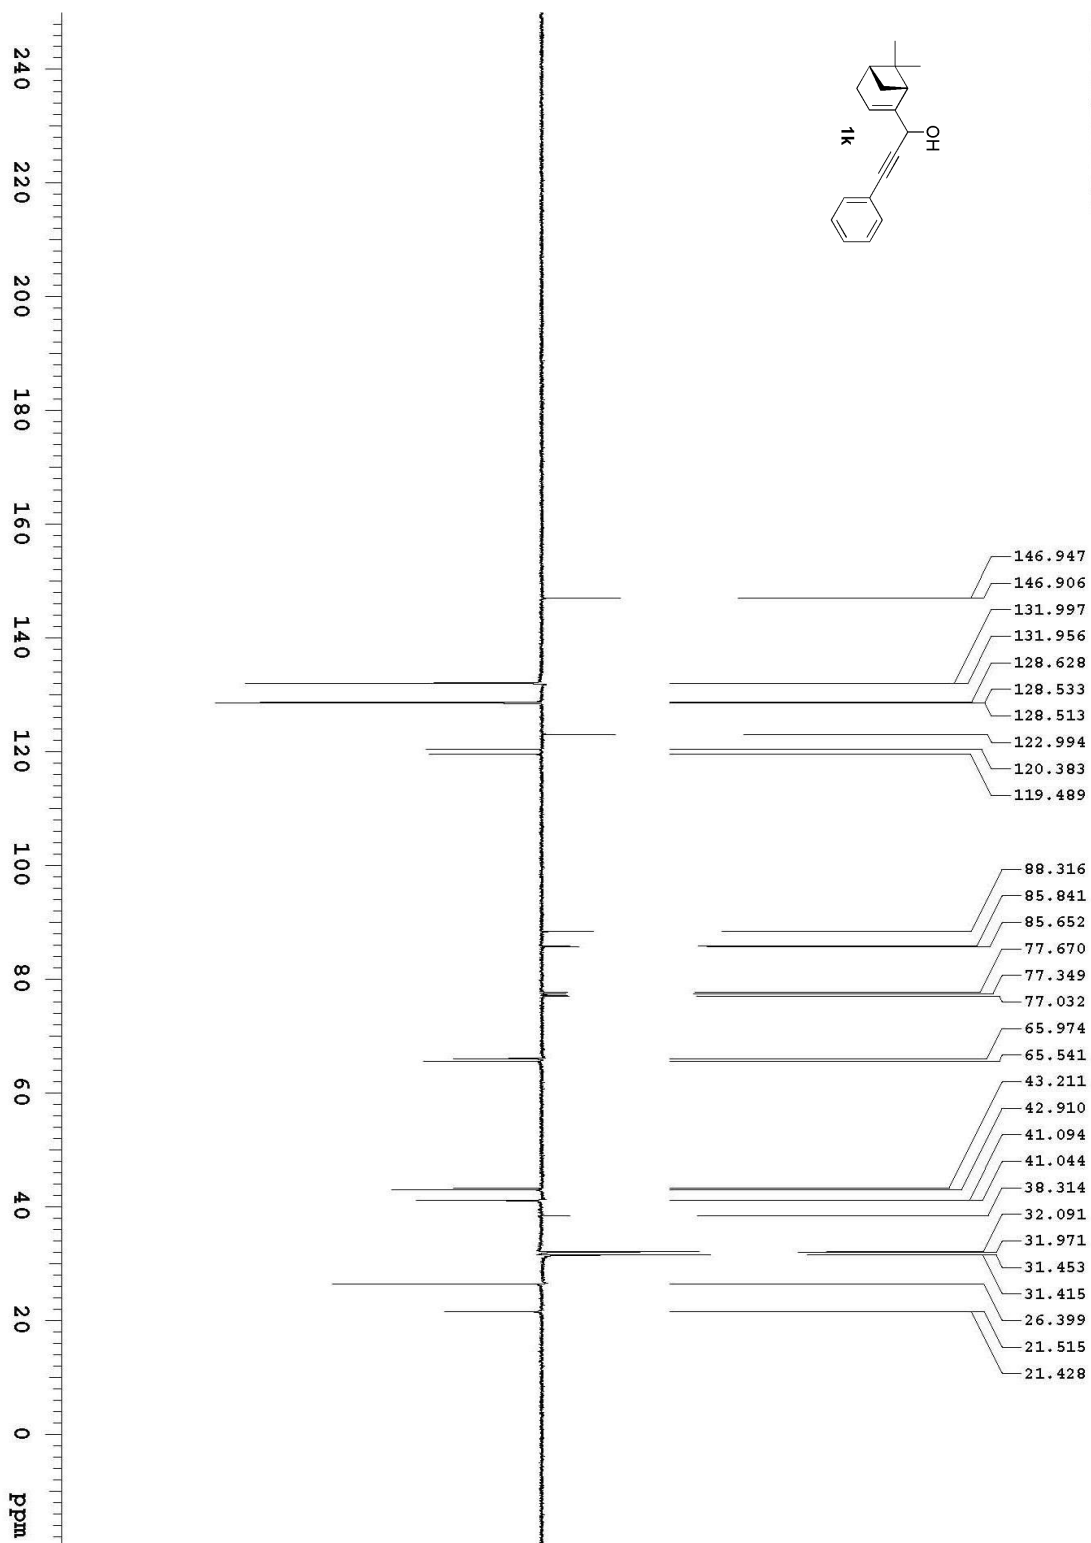

Yen-Ku, YKW-2-11  
 400.393 MHz H1 ID in cdcl3 (ref. to CDCl3 @ 7.26 ppm), temp 27.0 C -> actual temp = 27.0 C, m400gz probe  
 Pulse Sequence: szpul

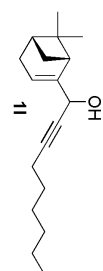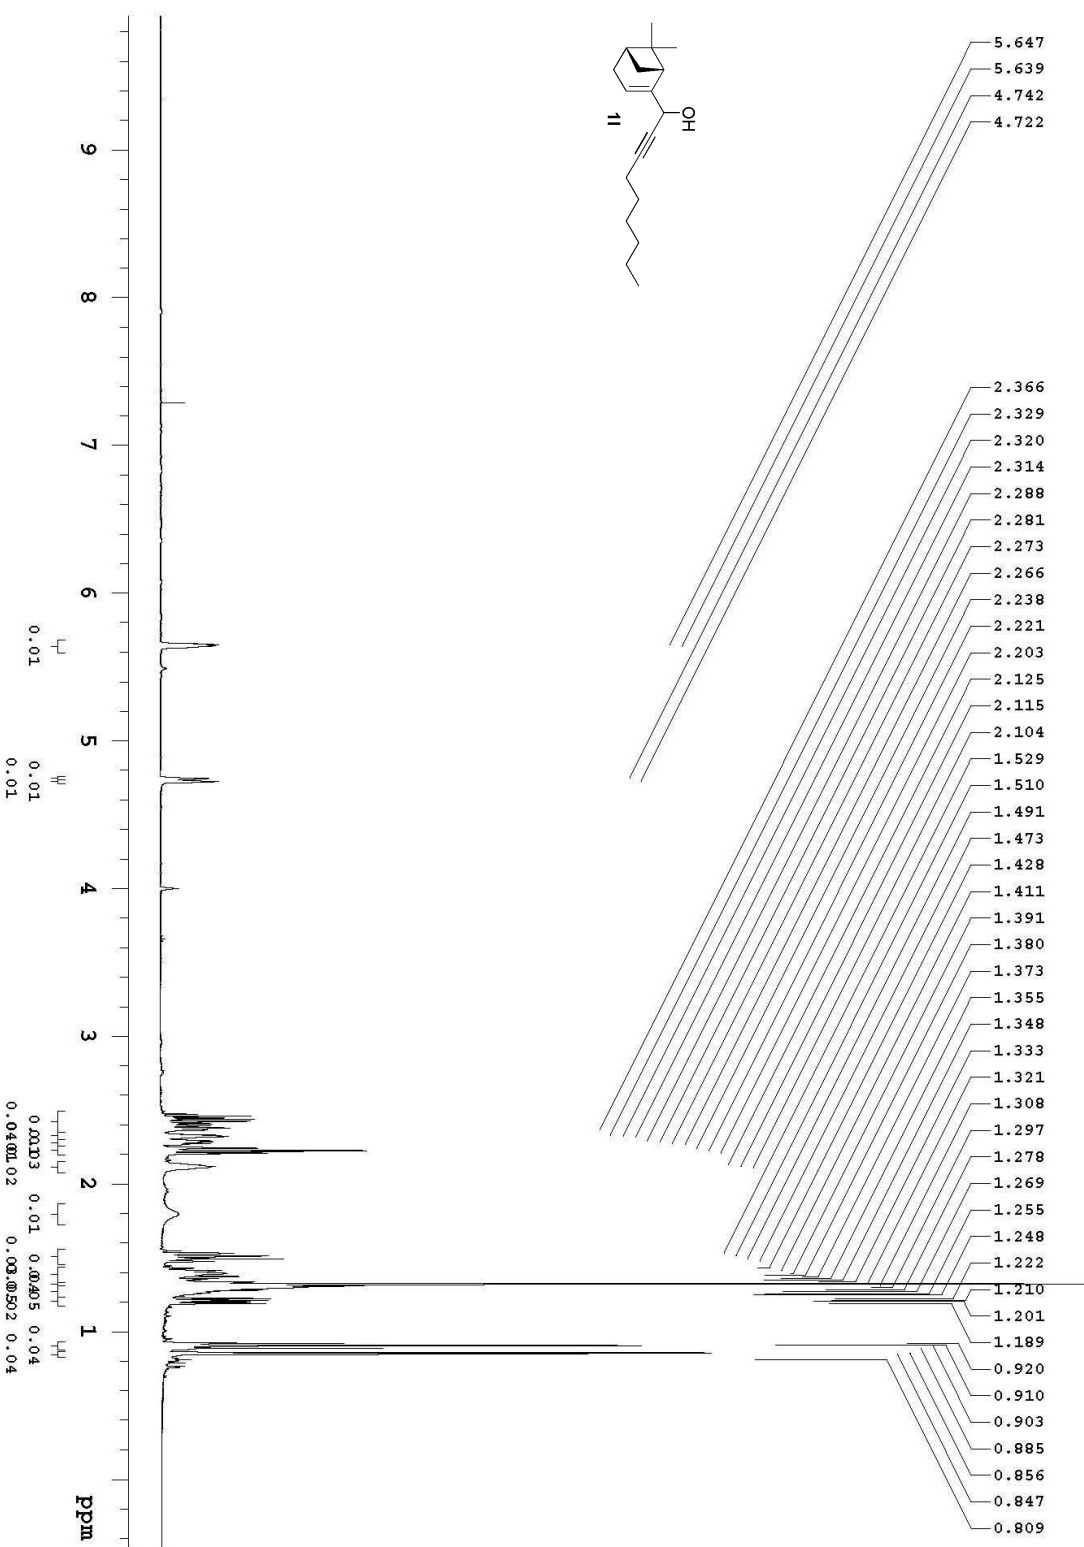

Yen-Ku, YKW-2-11-Cl3  
 100.690 MHz Cl3[H1] ID in cdCl3 (ref. to CDCl3 @ 77.06 ppm), temp 27.0 C -> actual temp = 27.0 C, m400gz probe  
 date: Jun 25 2009 sweep width: 27174Hz acq.time: 2.08 relax.time: 0.1s # scans: 1024 dig.res.: 0.2 Hz/pt hz/mm: 113.2  
 File: /mnt/d600/home13/westlmr/nmrdata/DATA\_FROM\_NMRSERVICE/Yen-Ku/2009.06/2009.06.25.m4\_YKW-2-11-Cl3\_18:35\_Cl3\_ID.fid  
 File: /mnt/d600/home13/westlmr/nmrdata/DATA\_FROM\_NMRSERVICE/Yen-Ku/2009.06/2009.06.25.m4\_YKW-2-11-Cl3\_18:35\_Cl3\_ID.fid

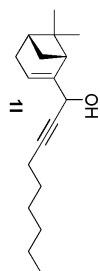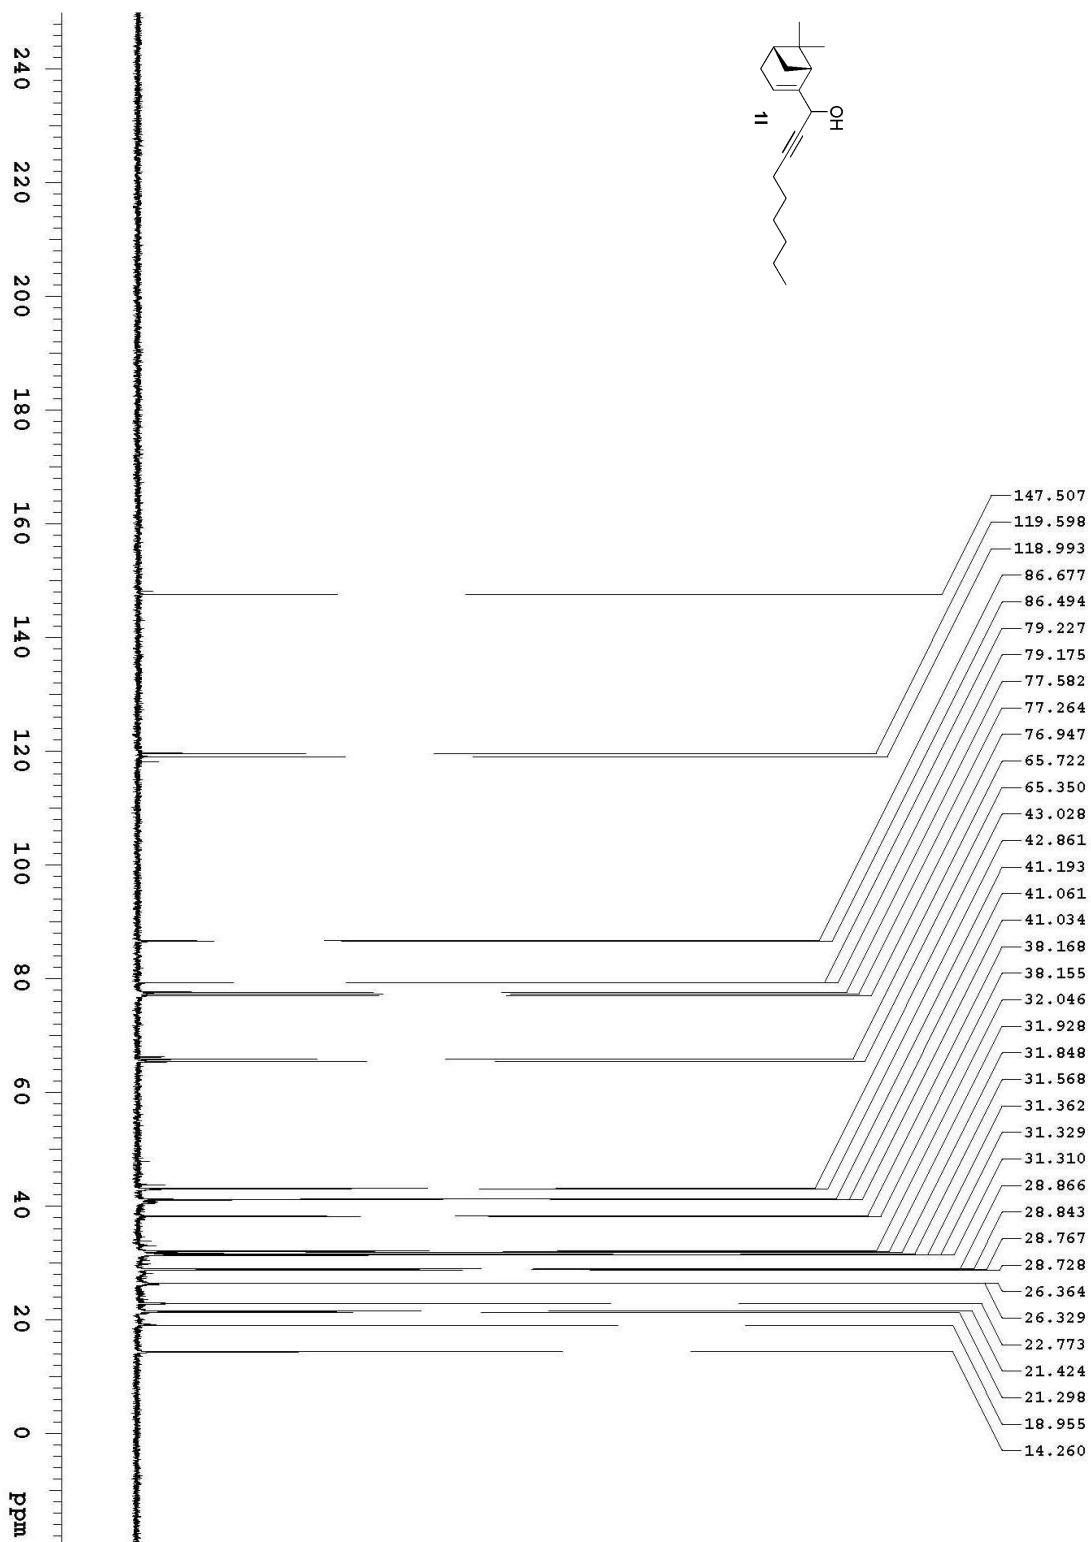

YMW-4-201  
 498.122 MHz H1 1D in cdcl3 (ref. to CDCl3 @ 7.26 ppm), temp 27.2 C -> actual temp = 27.0 C, autoxadb probe  
 Pulse Sequence: szpm1

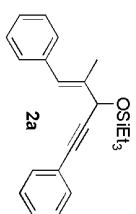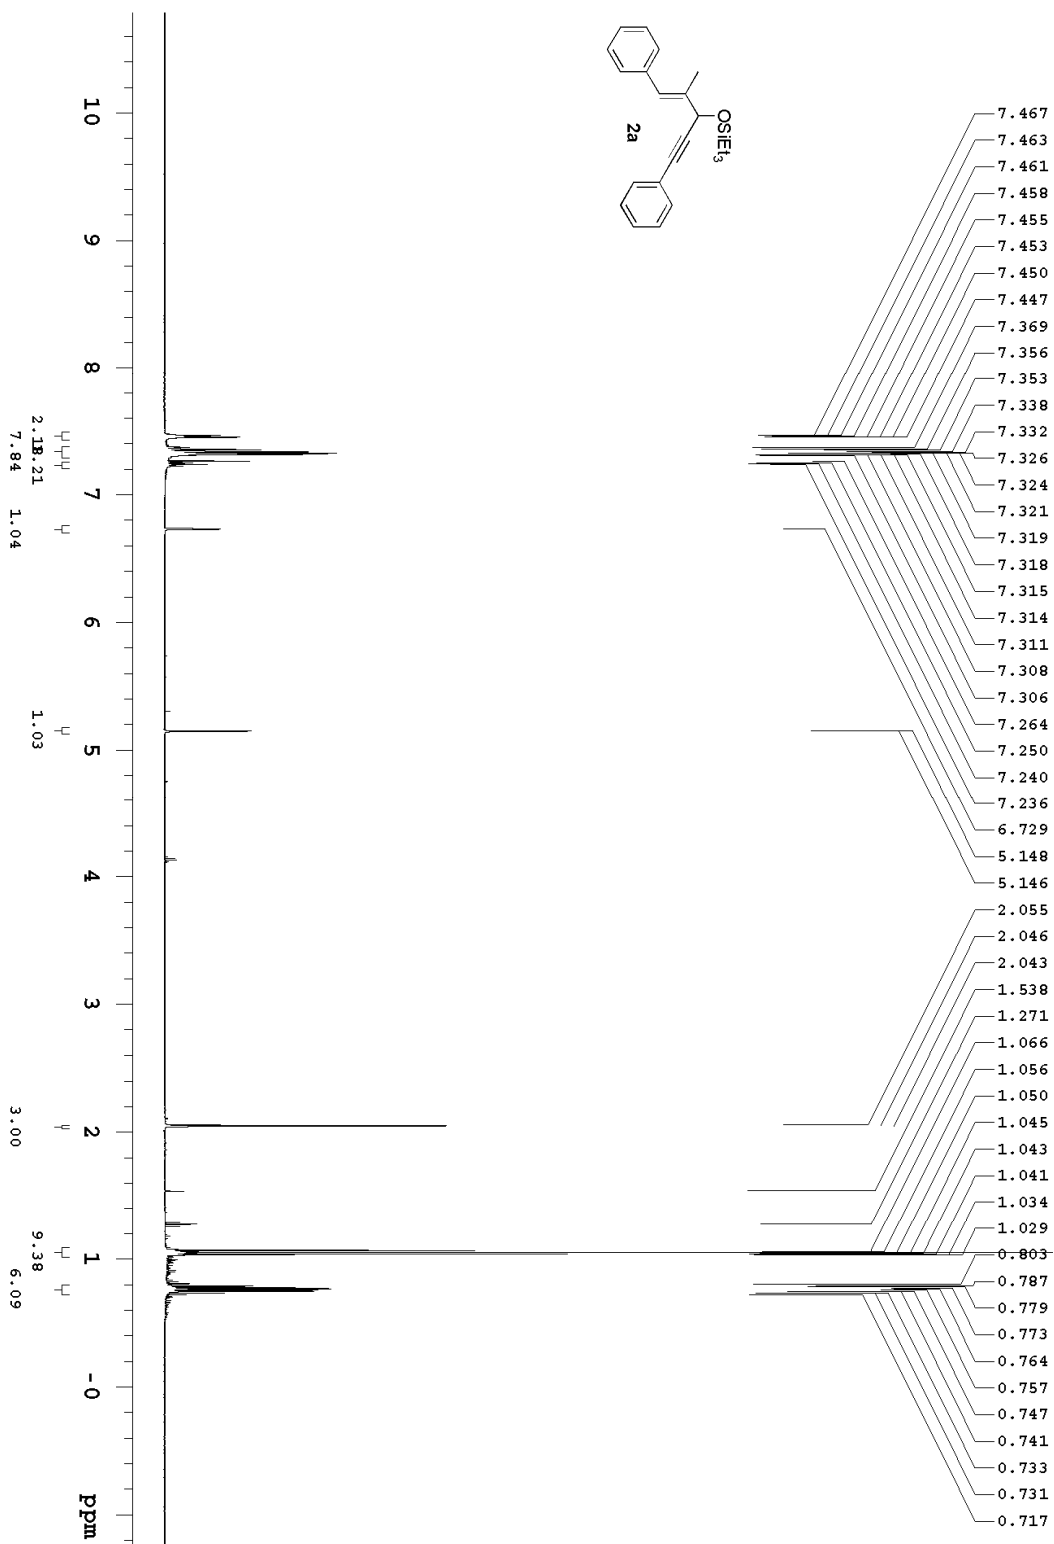

125.264 MHz, CDCl<sub>3</sub> [H<sub>1</sub>] ID in cdcl<sub>3</sub> (ref. to CDCl<sub>3</sub> @ 77.06 ppm), temp 27.2 C -> actual temp = 27.0 C, autoxdb probe  
 date: Apr 14 2010 sweep width: 33827Hz acq. time: 2.5s relax time: 0.1s # scans: 112 dig. res.: 0.3 Hz/pt hz/mm: 140.9  
 P0768r800583.p08 2pul file: /mnt/d600/home13/westcmmr/mrdata/DATA\_FROM\_NMRSERVICE/Yen-Ku/2010.04/14.15\_YKM-4-201\_C13\_ID.fid

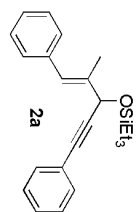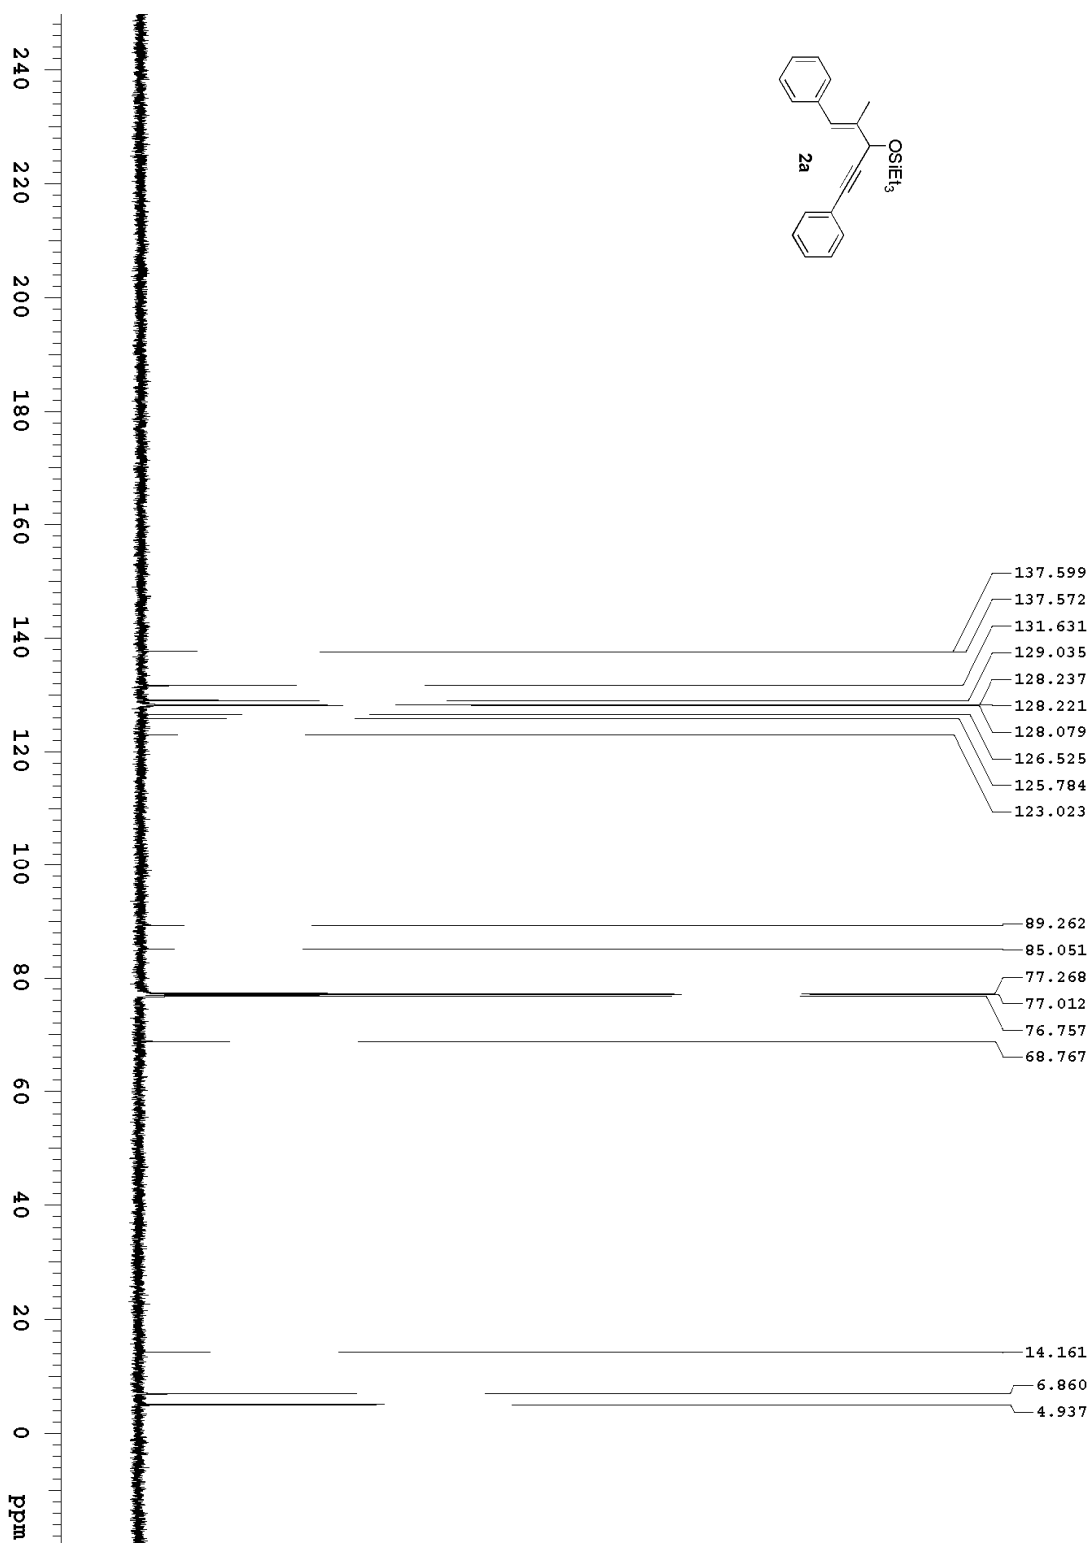



Yen-Ku, YKN-1-129-H  
 400.393 MHz <sup>1</sup>H ID in cdcl<sub>3</sub> (ref. to CDCl<sub>3</sub> @ 7.26 ppm), temp 27.0 C -> actual temp = 27.0 C, m400gz probe  
 Pulse Sequence: s2pul

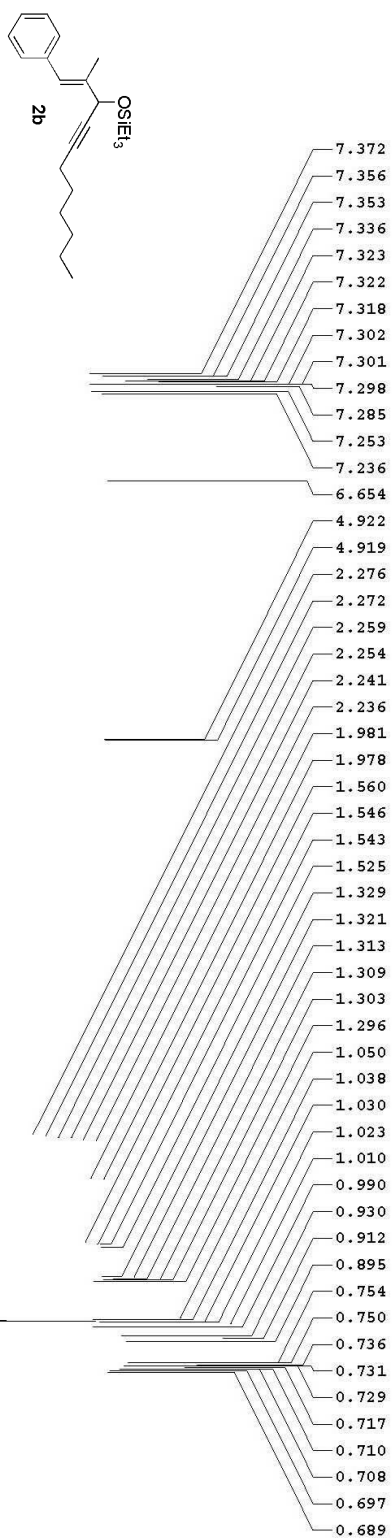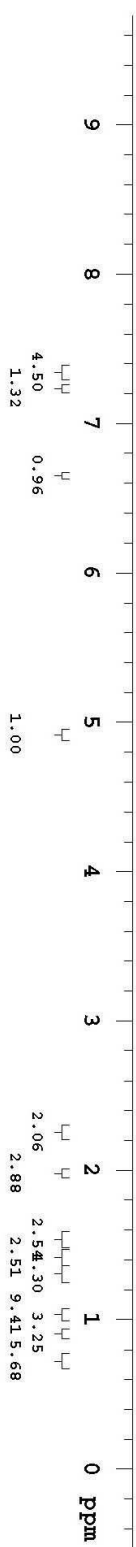

100.690 MHz C13[H1] 1D in cdcl3 (ref. to CDCl3 @ 77.06 ppm), temp 27.0 C -> actual temp = 27.0 C, m400gz probe  
 date: May 30 2009 sweep width: 27174Hz acq. time: 2.0s relax time: 0.1s # scans: 2048 dig. res: 0.2 Hz/pt 1h/nu: 113.2  
 PRG: zgpg30 f2: 125.760 g2pul file: /mnt/d600/home13/westumr/iridata/DAIYA\_FROM\_NMRSERVICE/Yen-Ku/2009.05/2009.05.30.m4\_YKM-1-129-13C\_01.48\_C13\_1D.f1d

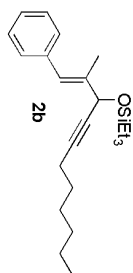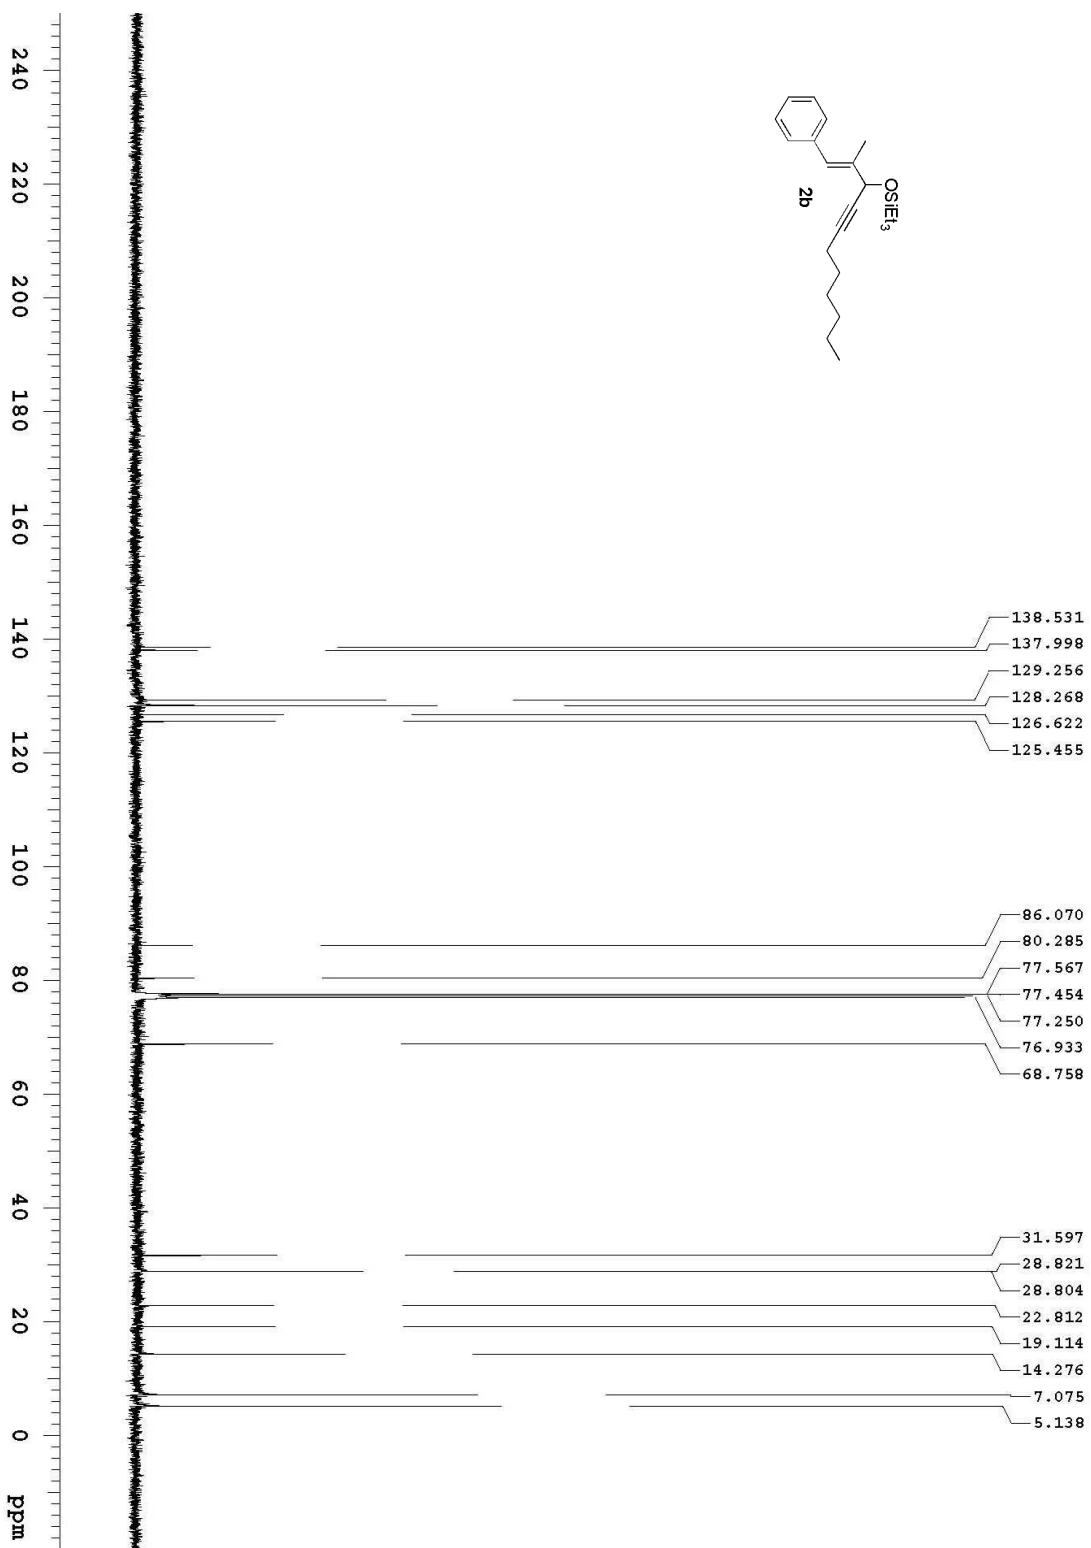

Yen-Ku, YKW-3-115m4  
 400.393 MHz H1 ID in cdcl3 (ref. to CDCl3 @ 7.26 ppm), temp 27.0 C -> actual temp = 27.0 C, m400gz probe  
 Pulse Sequence: s2pul

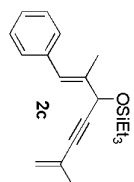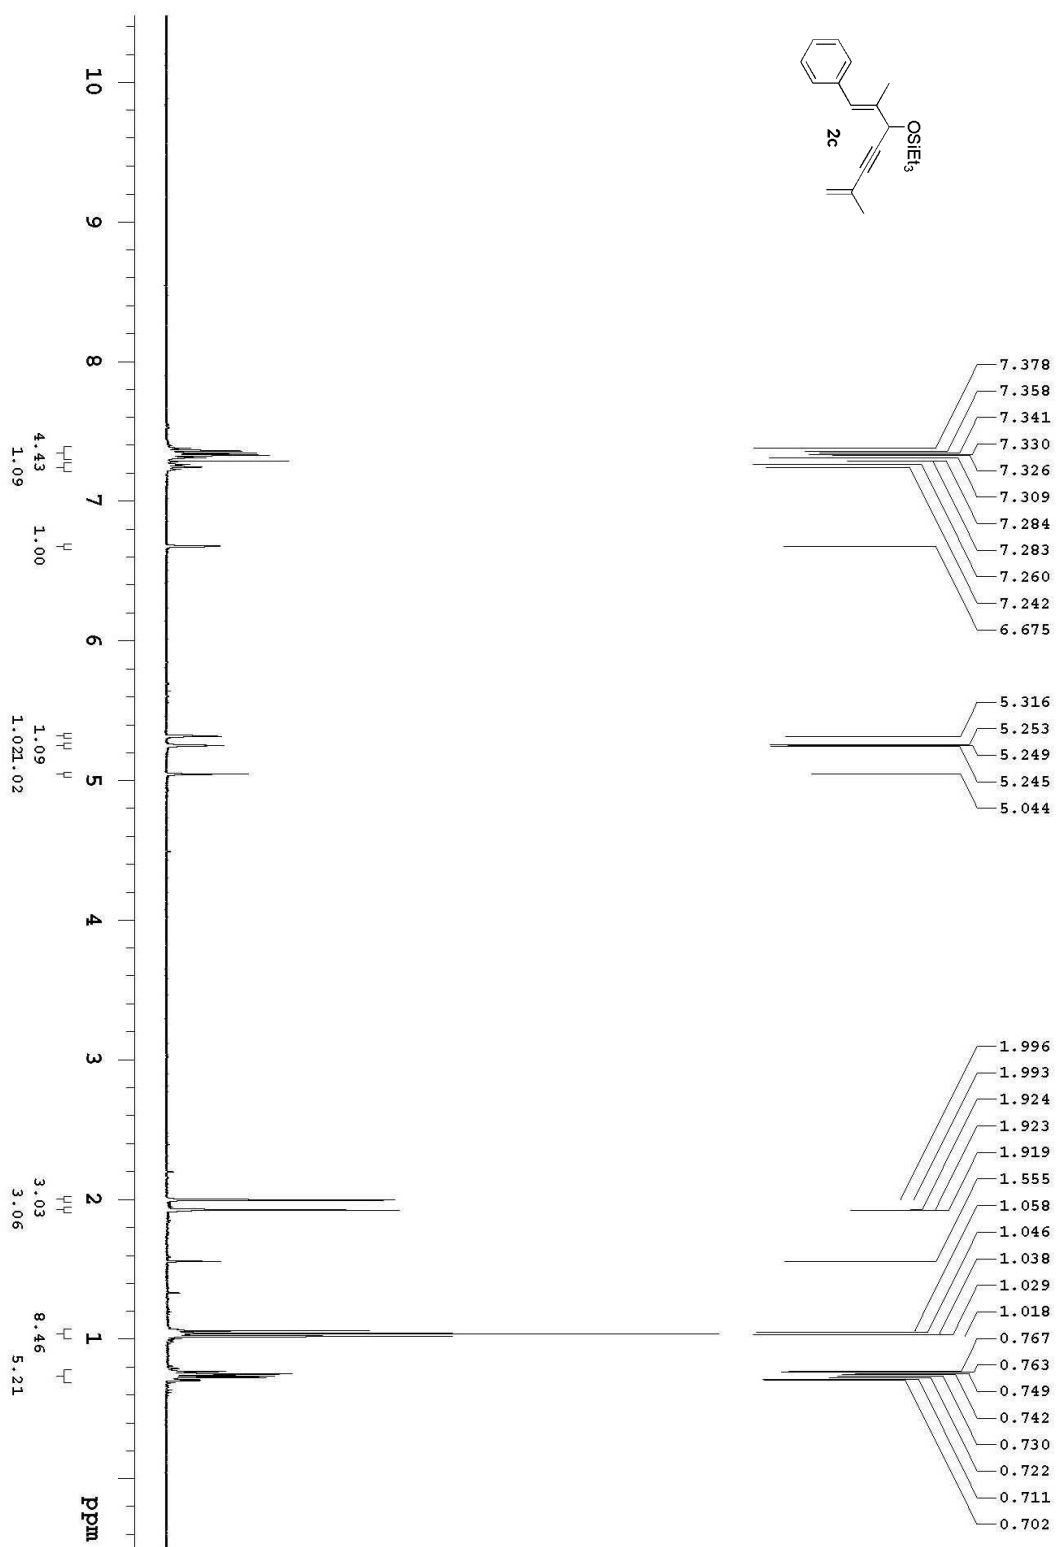

100.690 MHz C13 [H1] 1D in cdcl3 (ref. to CDCl3 @ 77.06 ppm), temp 27.0 C -> actual temp = 27.0 C, m400gz probe  
 date: Nov 13 2009 sweep width: 27174Hz acq.time: 2.0s relax.time: 0.1s # scans: 1024 dig.res.: 0.2 Hz/pt hz/mm: 113.2  
 F1F2: gpc1h31p0d32pul file:/mnt/d000/home13/westrum/mrdata/DATA FROM NMRSERVICE/ten-ku/2009.11/2009.11.13.m4\_1KM-3-115m4\_11.32\_C13\_1D.fid

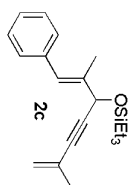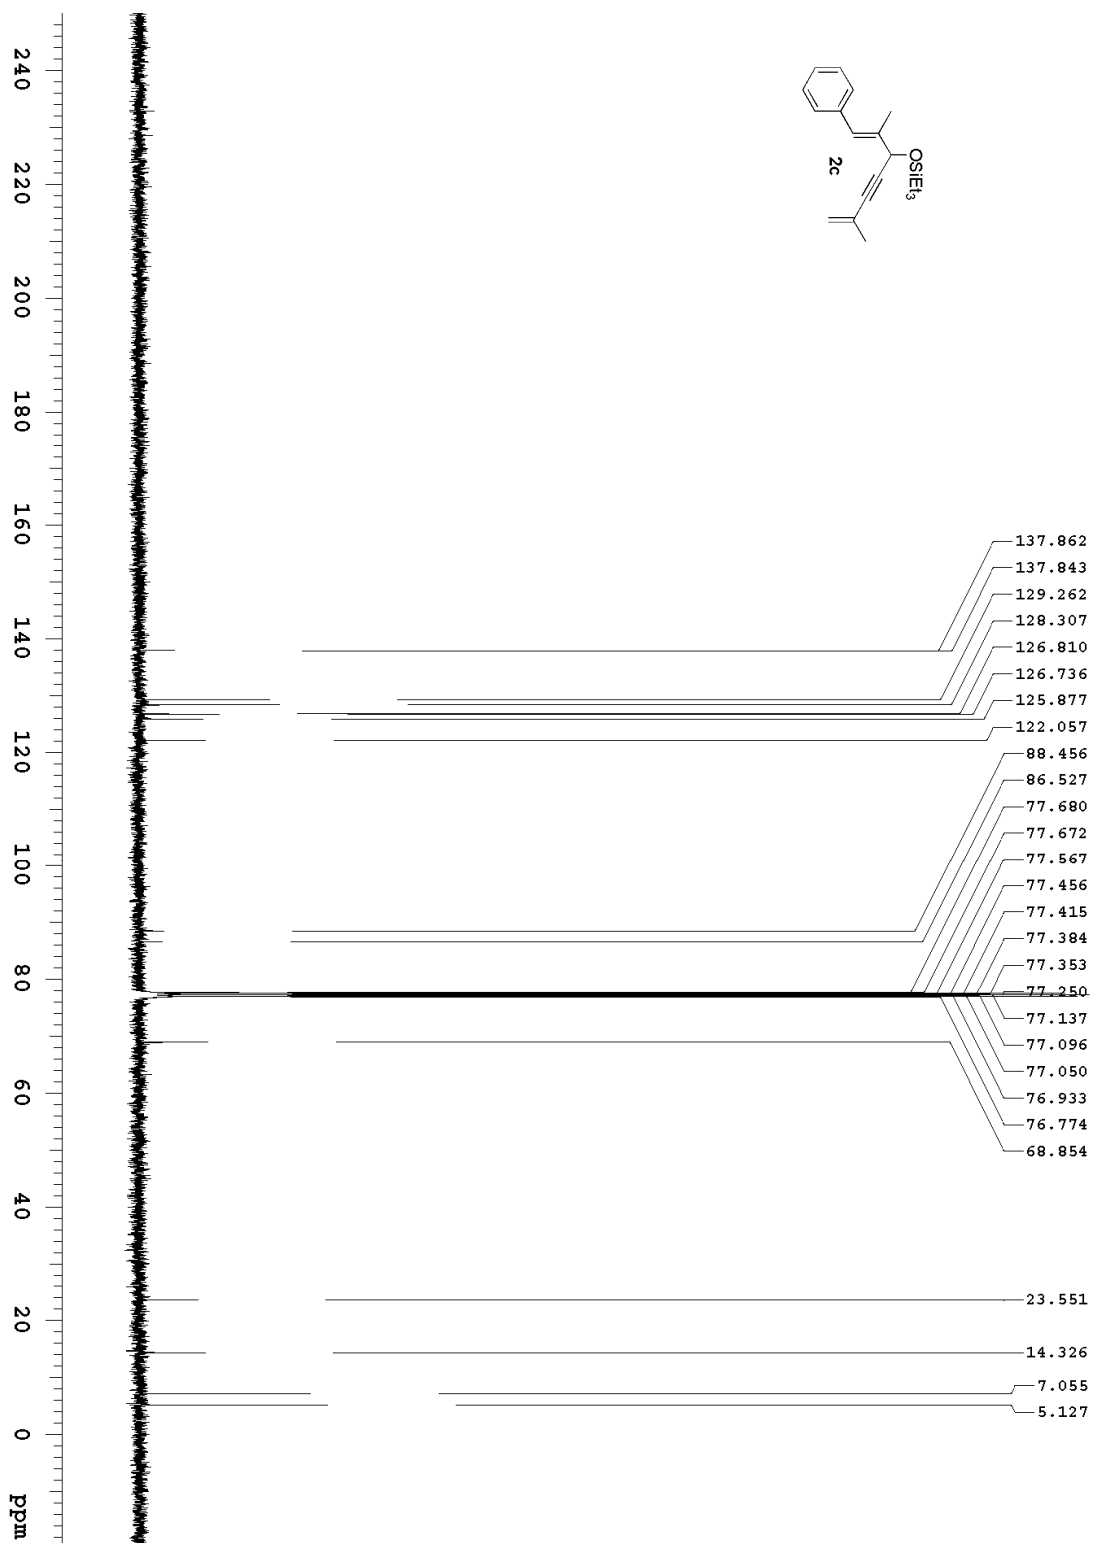

ven-KL, YKX-1-69, PP  
 400.393 MHz H1 ID in cdcl3 (ref. to CDCl3 @ 7.26 ppm), temp 27.0 C -> actual temp = 27.0 C, m400gz probe  
 Pulse Sequence: szpul

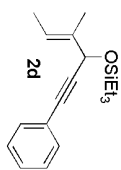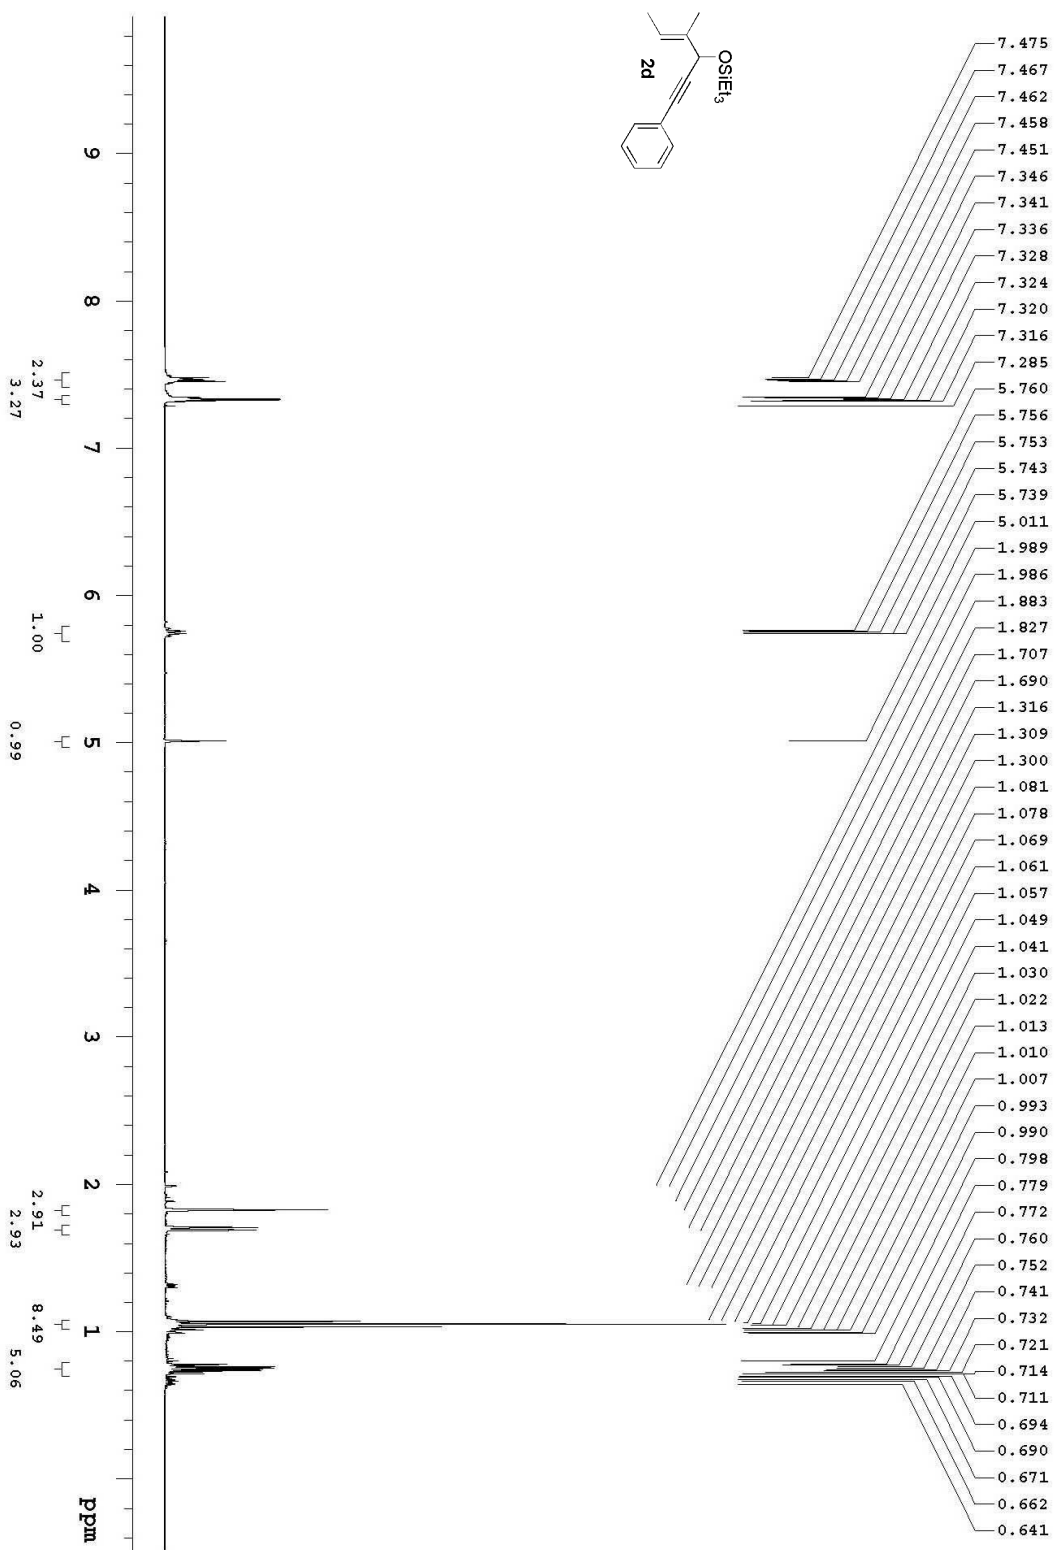

```

100.690 MHz C13[1H]1 apt in cdcl3 (ref. to CDCl3 @ 77.06 ppm), temp 27.0 C, m400gz probe
date_Thu_May_14_2009 experiment: 25444444 acq1: name: sgm001 relax time: 0.1s # scans: 2048 dtg_res: 0.4 Hz/pt hz/mm: 113.2
spectrometer: d601 file: /mnt/d600/home13/westnmr/nmrdata/DATA_FROM_NMRSERVICE/Yen-Ku/2009.05/2009.05.14_m4_YKM-1-69_PP_20:04_C13_apt.fid
Pulse Sequence: apt

```

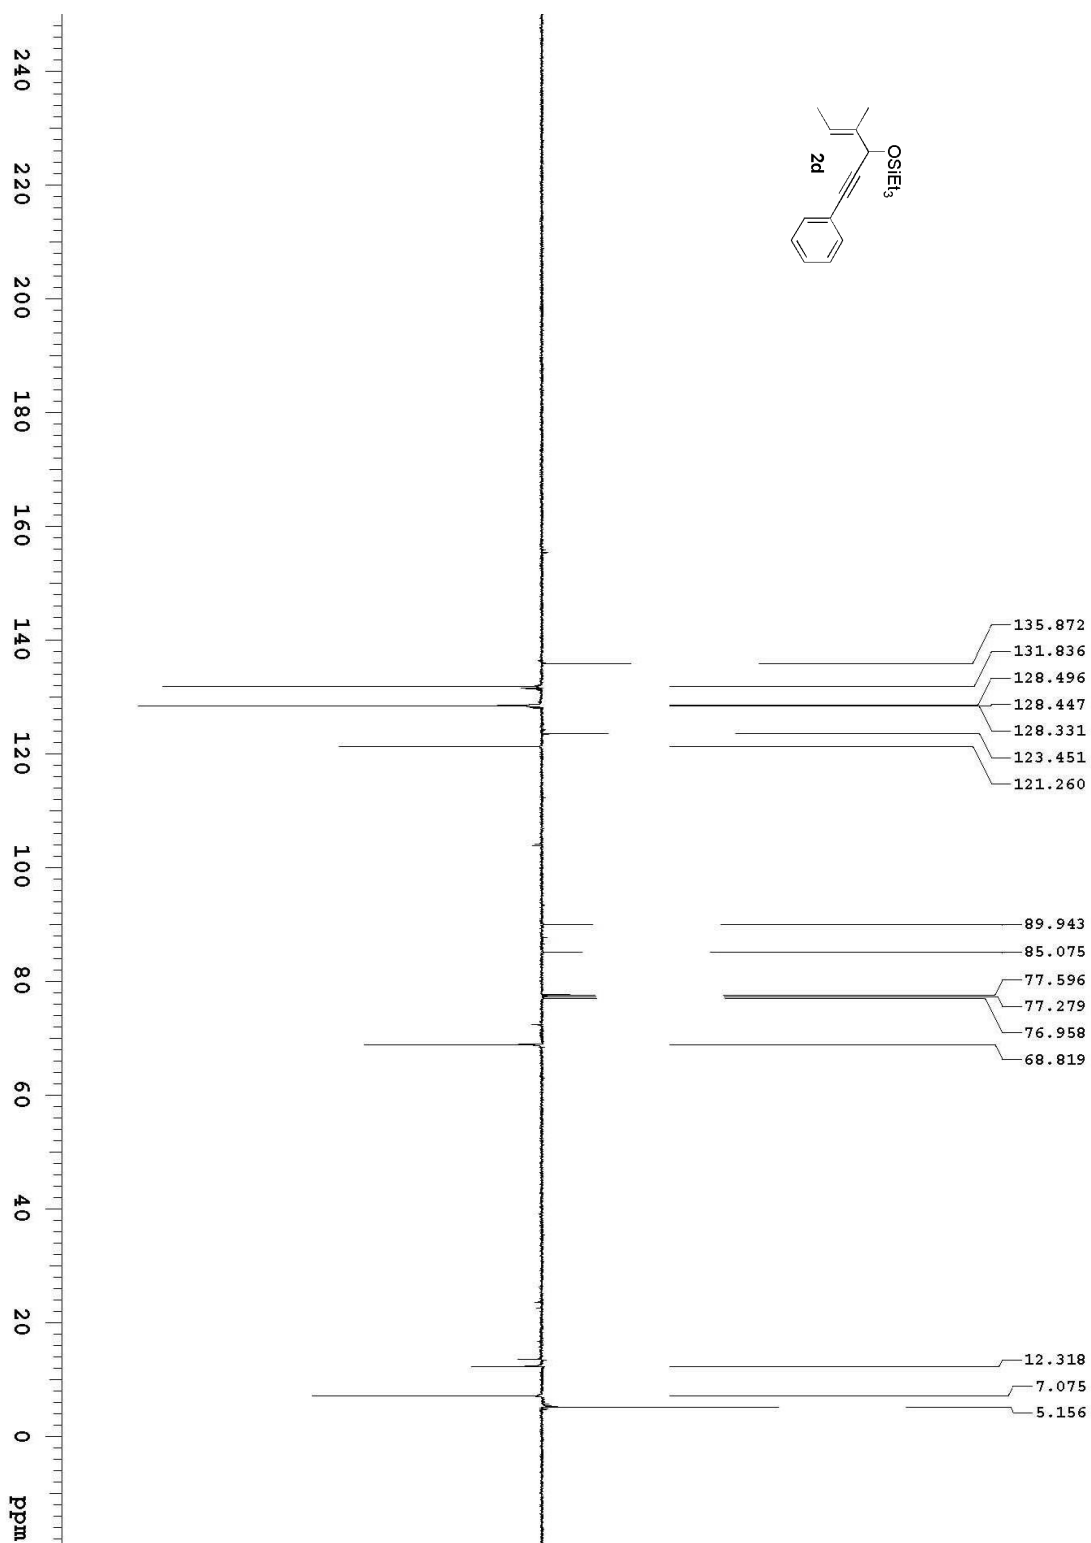

Yen-Ku, YKW-2-123  
 400.393 MHz <sup>1</sup>H ID in CDCl<sub>3</sub> (ref. to CDCl<sub>3</sub> @ 7.26 ppm), temp 27.0 C -> actual temp = 27.0 C, m400gz probe  
 Pulse Sequence: szpul

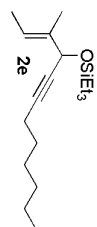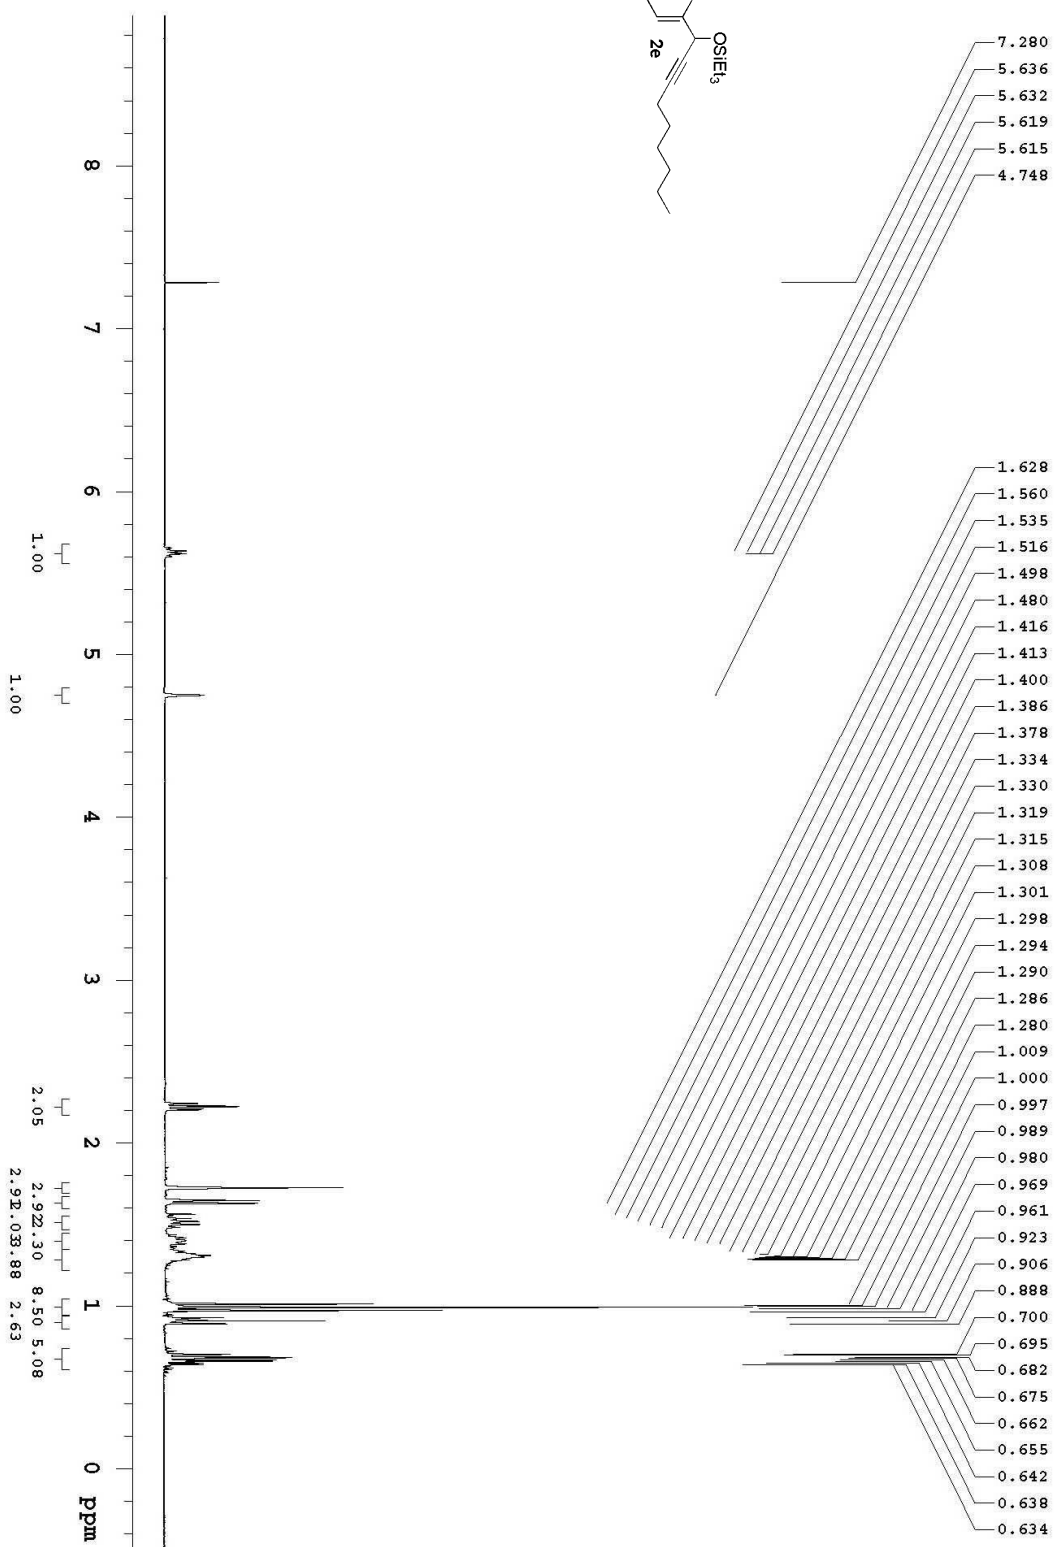

100.690 MHz C13[H1] 1D in cdcl3 (ref. to CDCl3 @ 77.06 ppm), temp 27.0 C -> actual temp = 27.0 C, m400gz probe  
 date: Aug 12 2009 sweep width: 27174Hz acq.time: 0.1s # scans: 1024 dig.res: 0.2 Hz/pt hz/mm: 113.2  
 PRG: zgpg30 f2: 80.135 MHz f1: 100.625 MHz file: /mnt/d600/home13/westmr/1mdata/DATA\_FROM\_NMRSERVICE/Yen-Ku/2009.08/2009.08.12.m4\_1KM-2-123\_13:48\_C13\_1D.fid

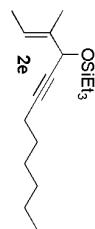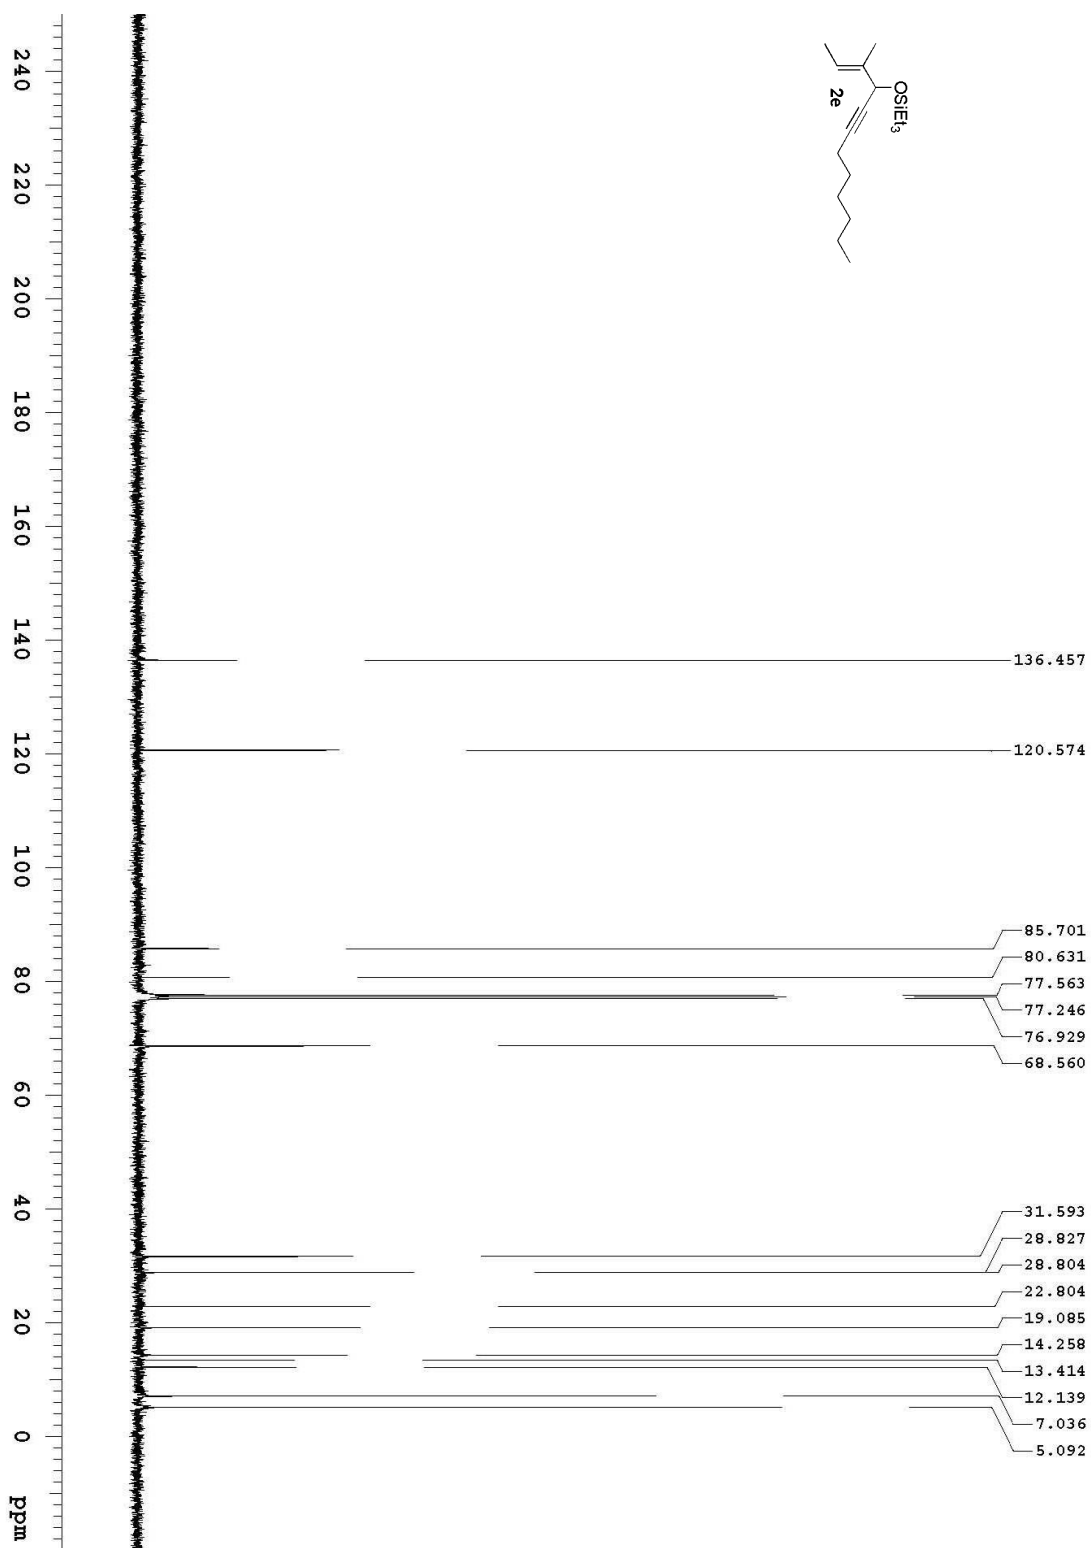



YMW-2-125  
 299.971 MHz <sup>1</sup>H 1D in cdcl<sub>3</sub> (ref. to CDCl<sub>3</sub> @ 7.26 ppm), temp 27.5 C -> actual temp = 27.0 C, id300 probe  
 Pulse Sequence: s2pul

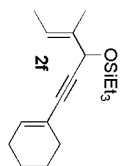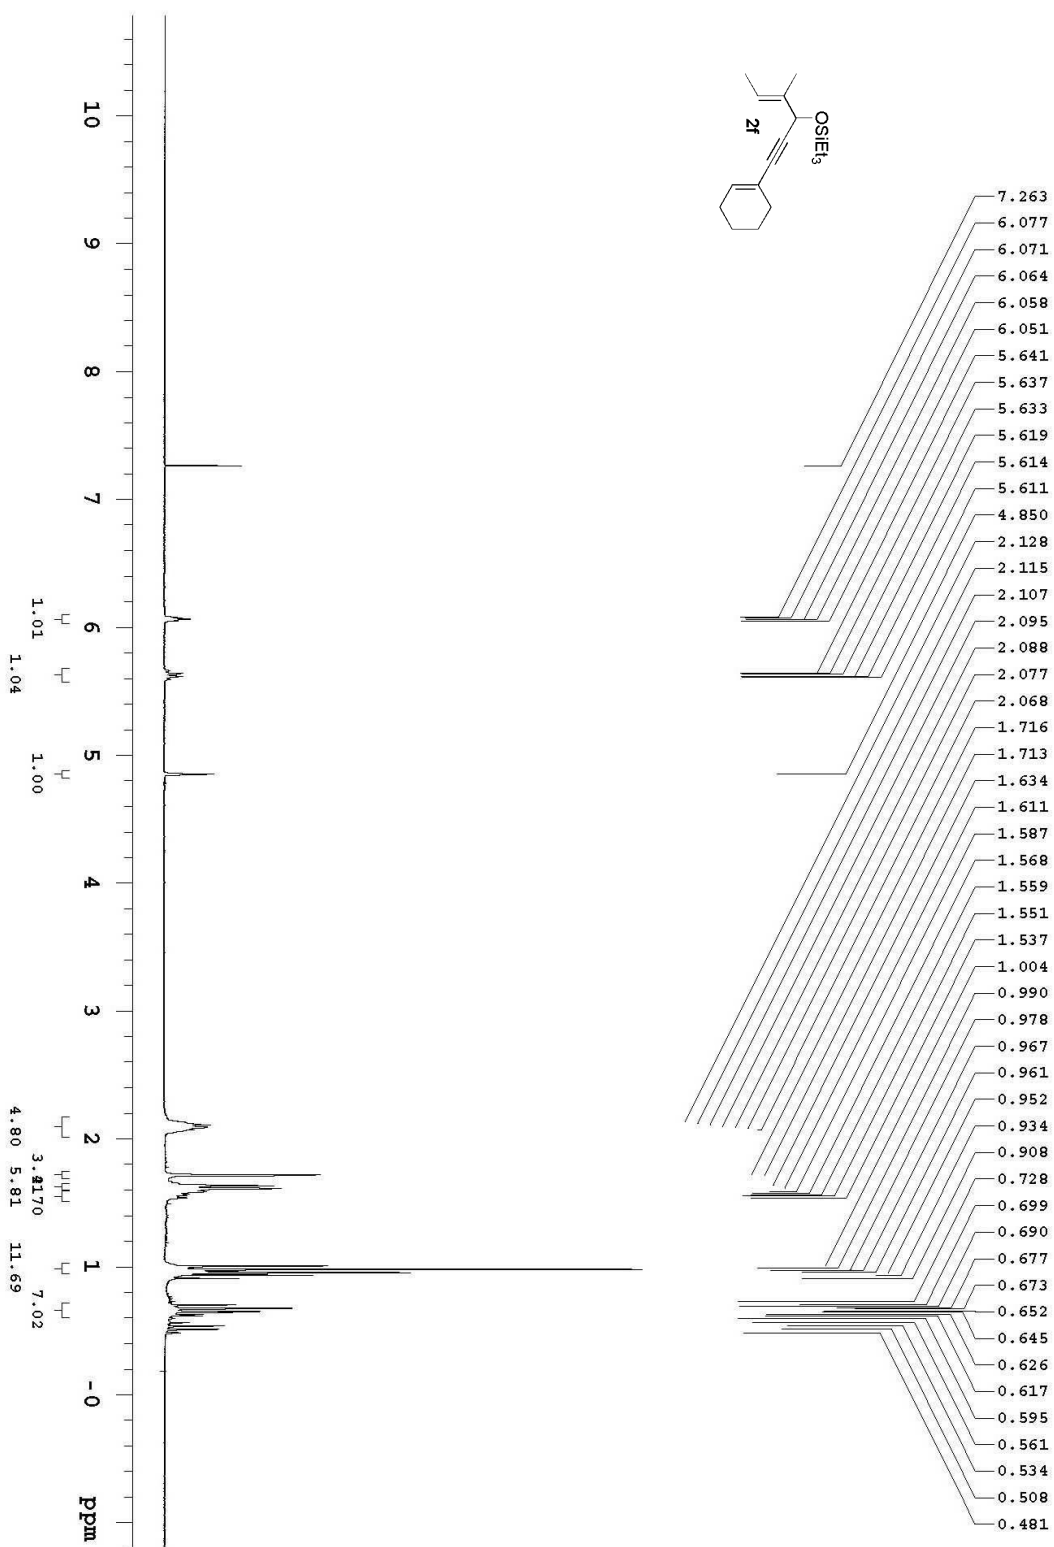

100.690 MHz C13[H1] 1D in cdcl3 (ref. to CDCl3 @ 77.06 ppm), temp 27.0 C -> actual temp = 27.0 C, m400gz probe  
 date: Aug 12 2009 sweep width: 27174Hz acq.time: 2.0s relax.time: 0.1s # scans: 1024 dig.res: 0.2 Hz/pt hz/mm: 113.2  
 file: /mnt/d600/home13/westmtr/mrdata/DATA\_FROM\_NMRSERVICE/Yen-Ku/2009.08/2009.08.12.m4\_1KM-2-125.17:42\_C13\_1D.fid

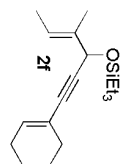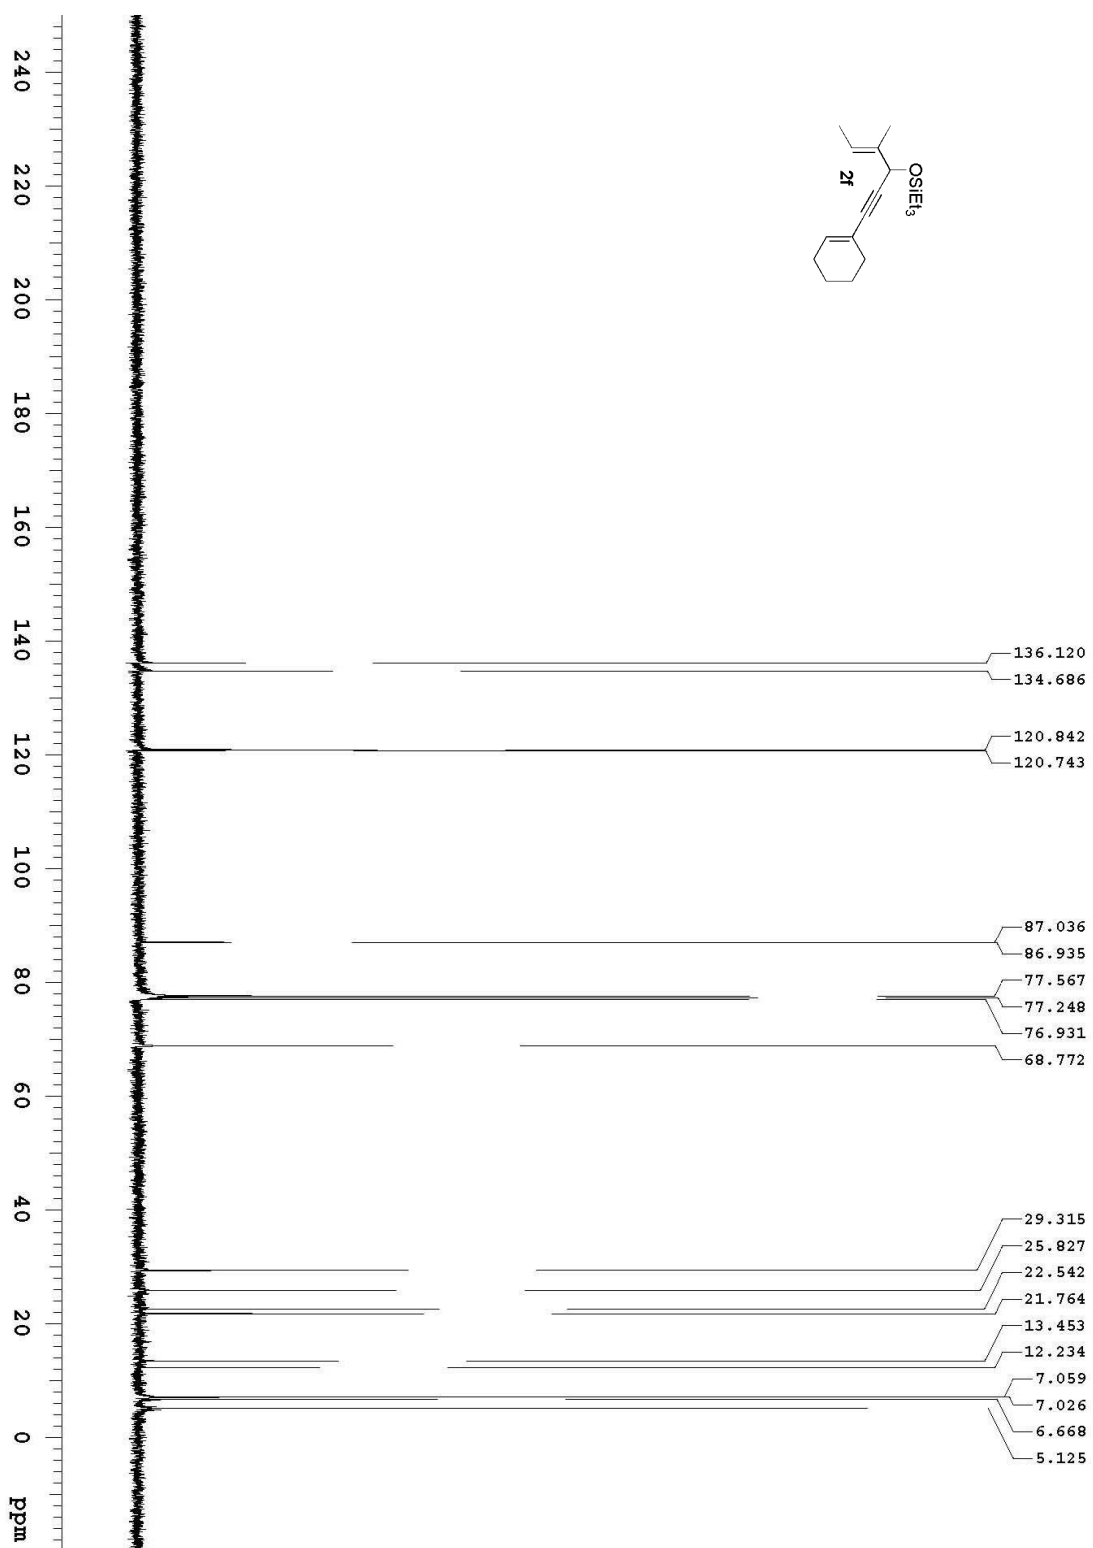

Yen-Ku, YKN-2-151  
 400.393 MHz H1 ID in cdcl3 (ref. to CDCl3 @ 7.26 ppm), temp 27.0 C -> actual temp = 27.0 C, m400gz probe  
 Pulse Sequence: szpul

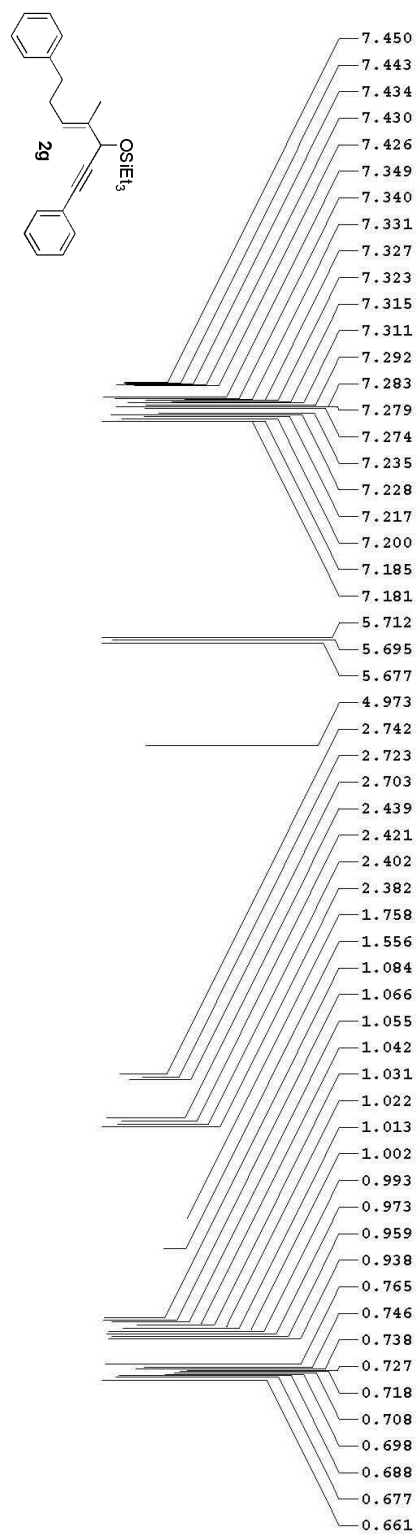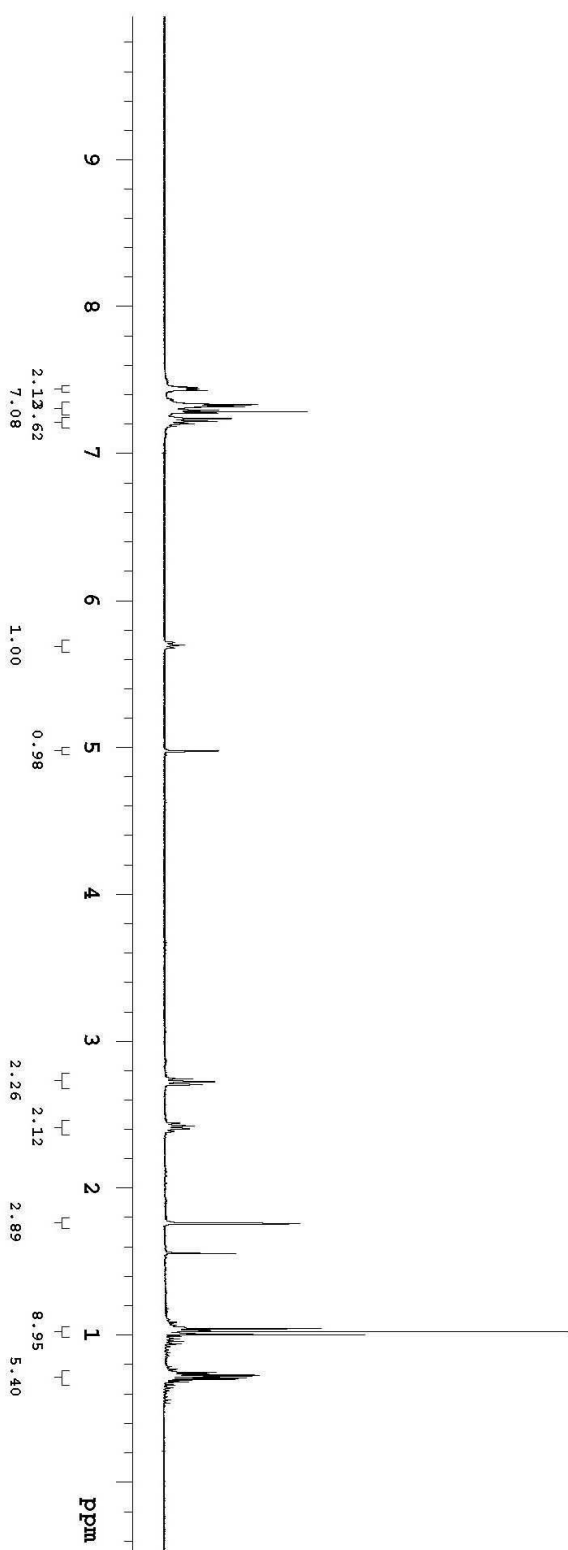

100.690 MHz C13[H1] 1D in cdcl3 (ref. to CDCl3 @ 77.06 ppm), temp 27.0 C -> actual temp = 27.0 C, m400gz probe  
 date: Aug 24 2009 sweep width: 27174Hz acq. time: 2.0s relax time: 0.1s # scans: 4000 dig. res: 0.2 Hz/pt 1h/mm: 113.2  
 prog: zgpg30 f2: 101.62500000000000 file: /mnt/d600/home13/westumr/iridata/DATA\_FROM\_NMRSERVICE/Yen-Ku/2009.08.24.m4\_YKM-2-151-C13\_23:40\_C13\_1D.f1d  
 F1: 101.62500000000000 F2: 101.62500000000000

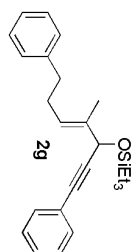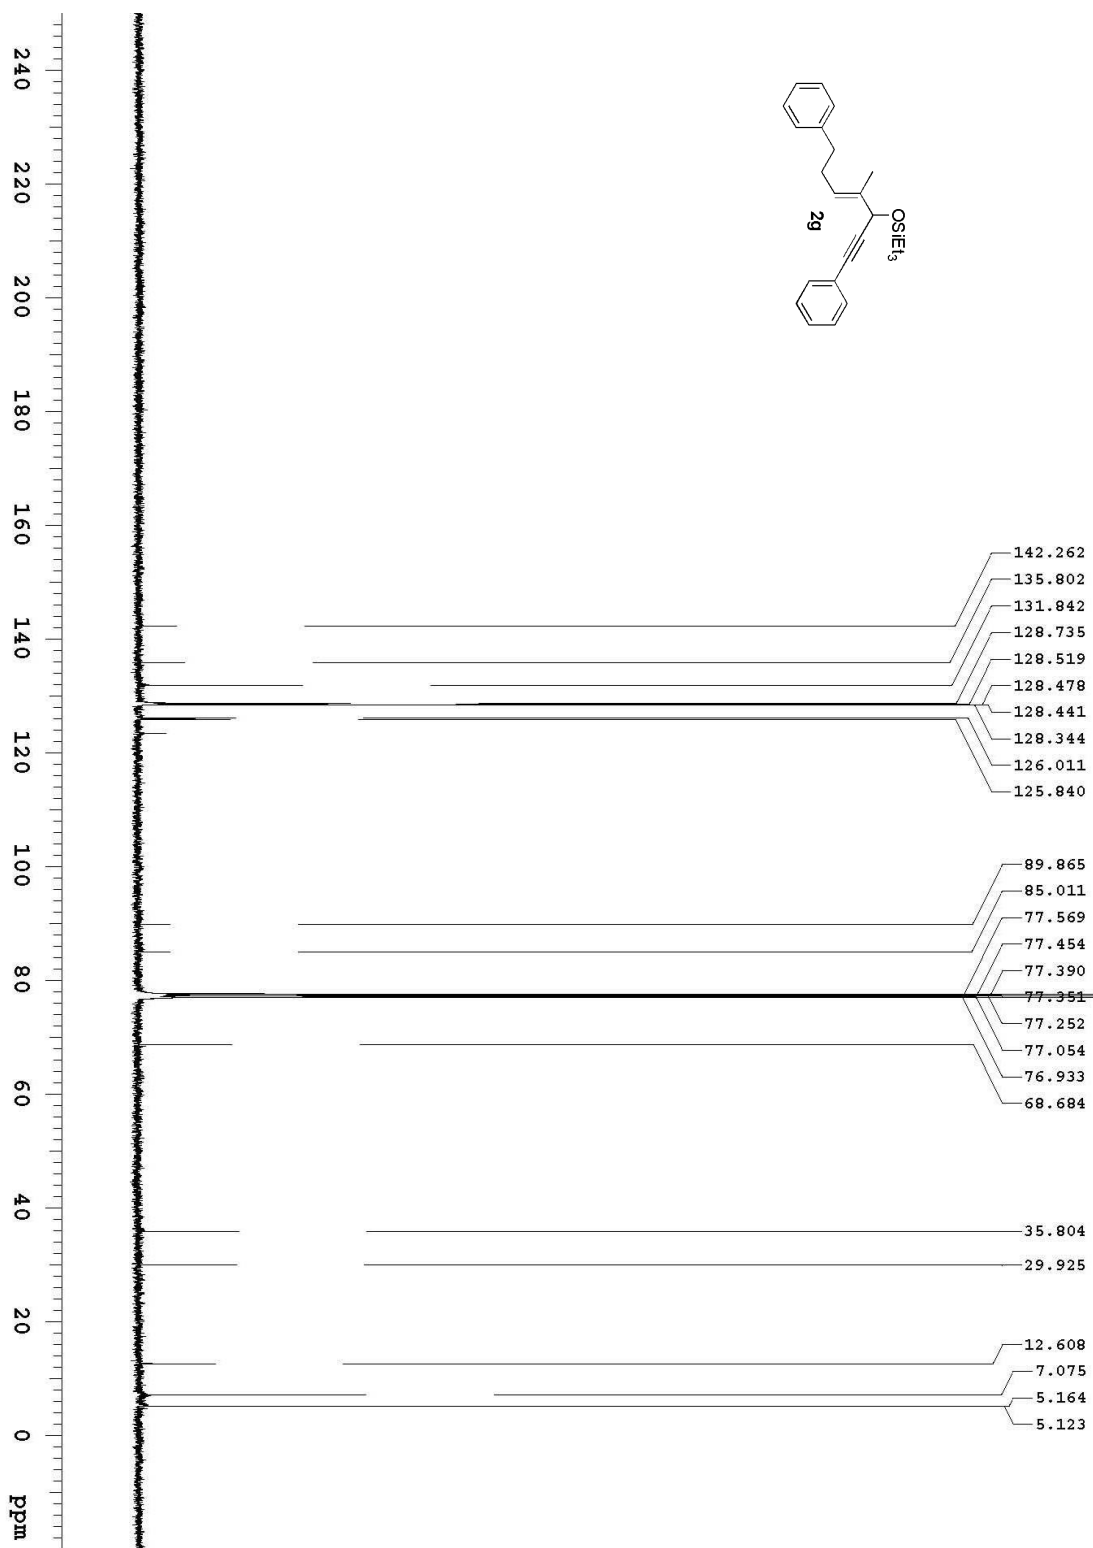

Yen-Ku, YKW-1-151  
 400.393 MHz H1 ID in cdcl3 (ref. to CDCl3 @ 7.26 ppm), temp 27.0 C -> actual temp = 27.0 C, m400gz probe  
 Pulse Sequence: szpul

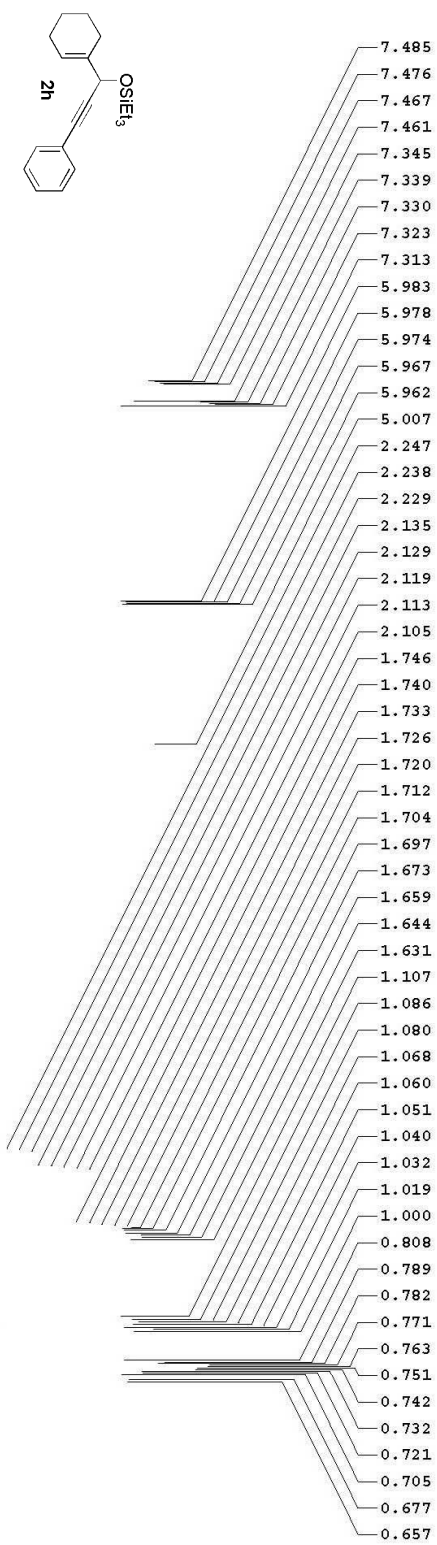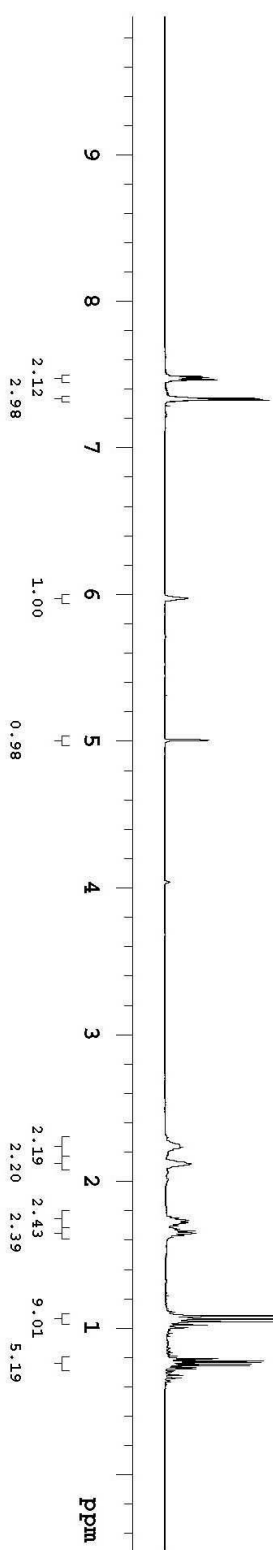

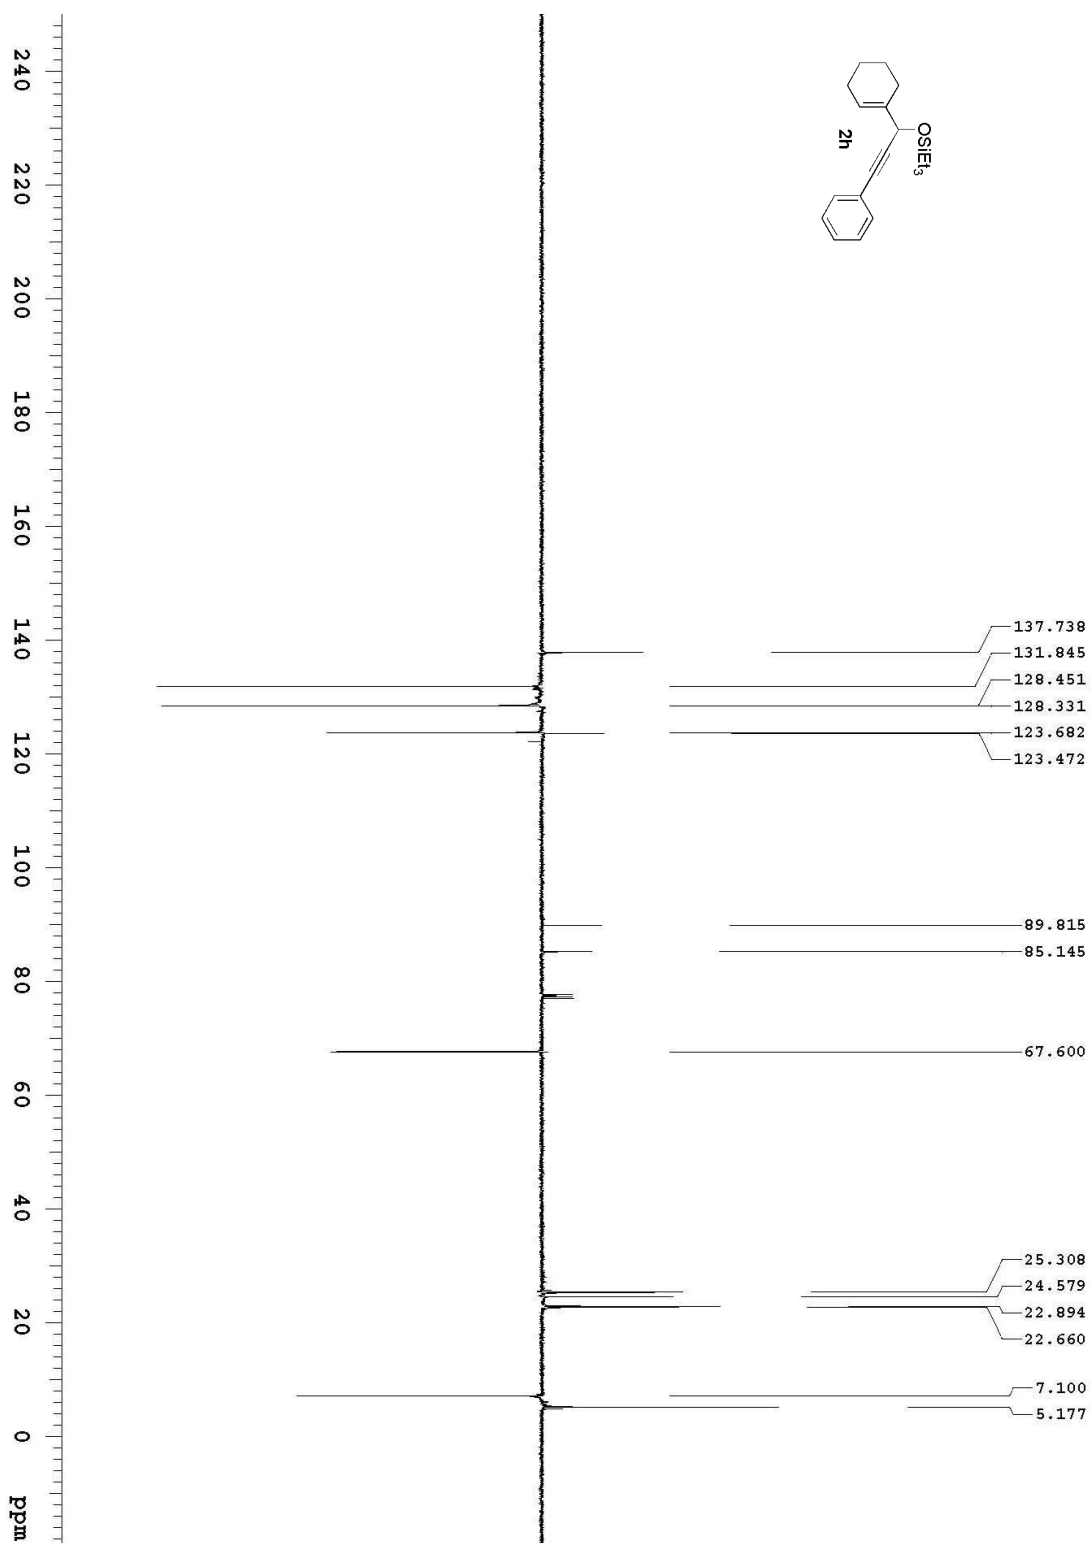

Yen-Ku, YKW-1-189-M4  
 400.393 MHz <sup>1</sup>H ID in cdcl<sub>3</sub> (ref. to CDCl<sub>3</sub> @ 7.26 ppm), temp 27.0 C -> actual temp = 27.0 C, m400gz probe  
 Pulse Sequence: s2pul

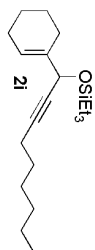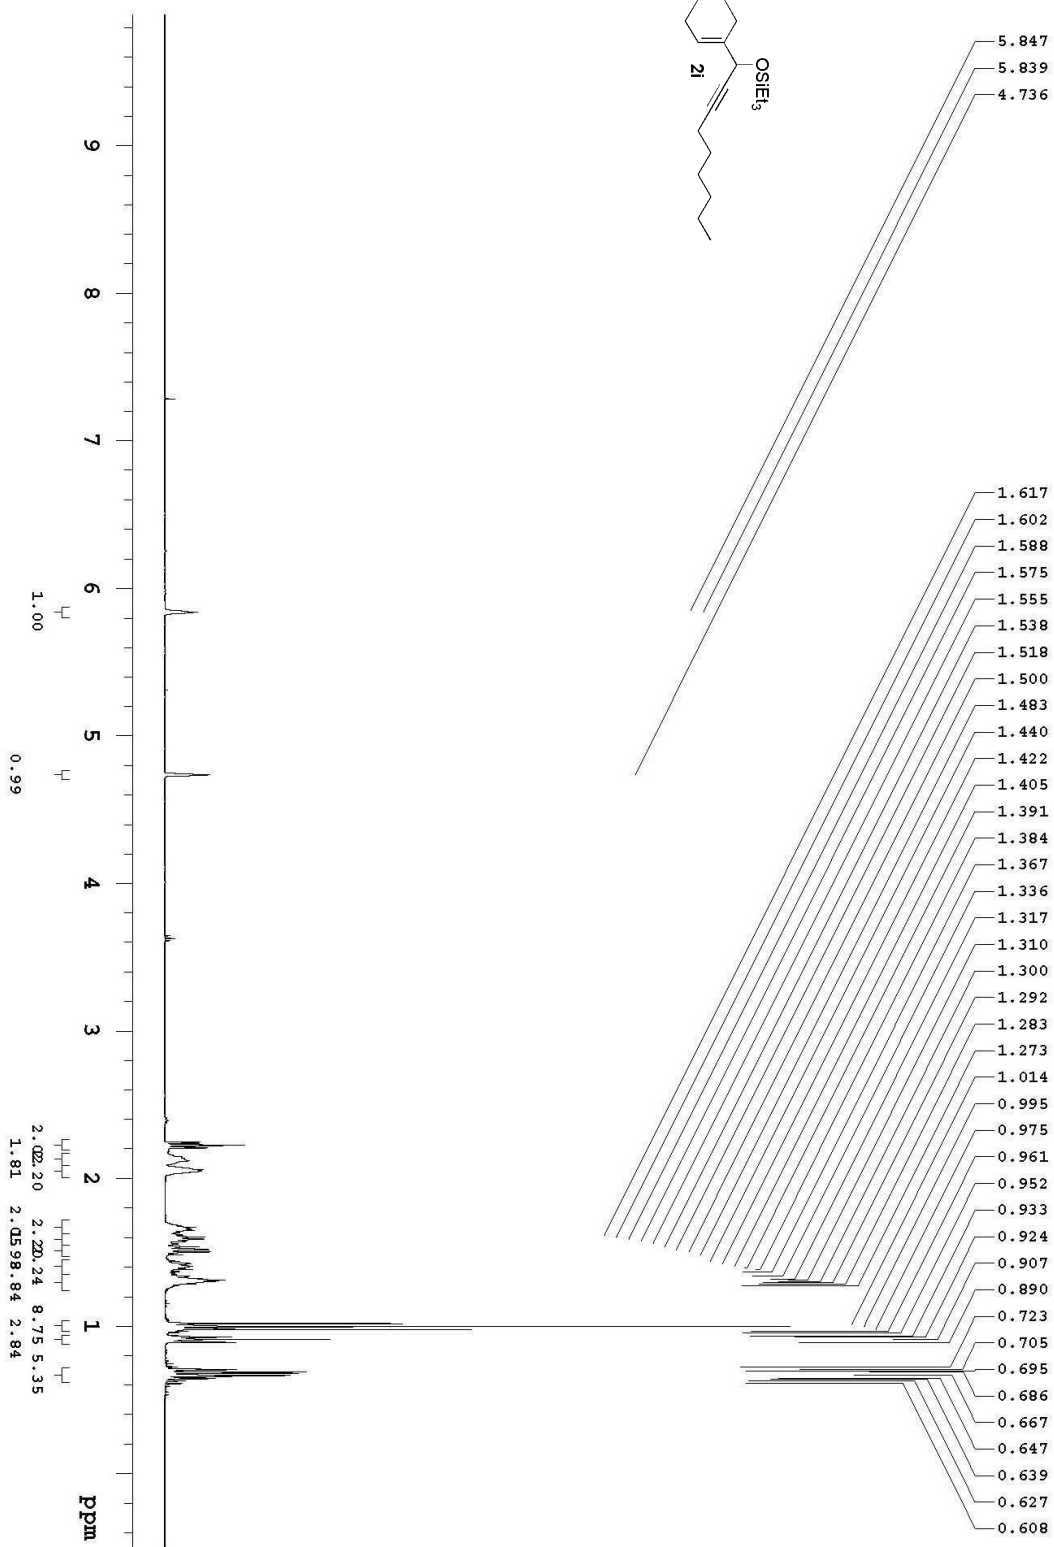





Yen-Ku, YKM-2-185  
 400.393 MHz H1 1D in cdcl3 (ref. to CDCl3 @ 7.26 ppm), temp 27.0 C -> actual temp = 27.0 C, m400gz probe  
 Pulse Sequence: szpul

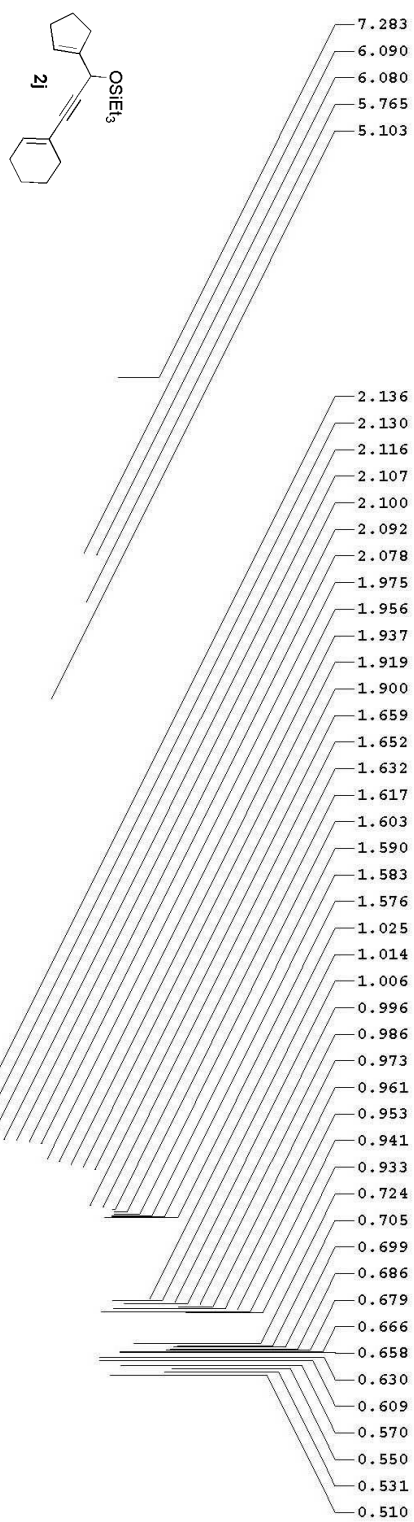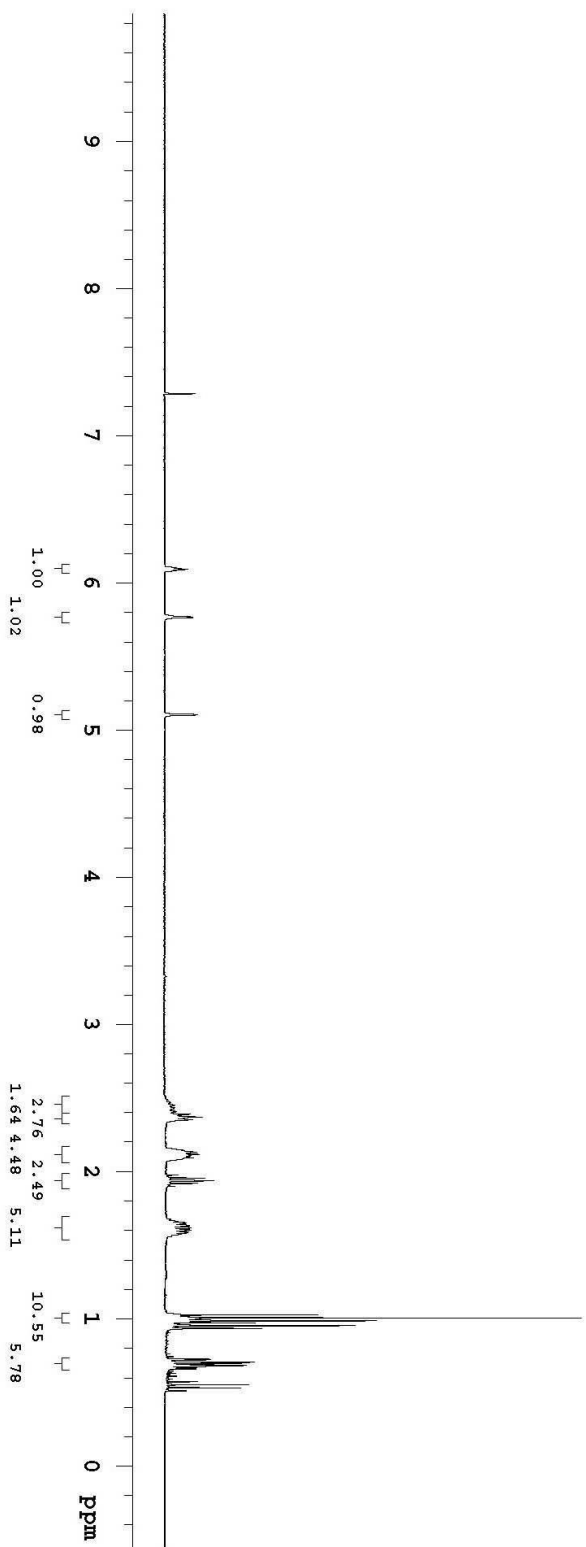

100.690 MHz C13[H1] 1D in cdcl3 (ref. to CDCl3 @ 77.06 ppm), temp 27.0 C -> actual temp = 27.0 C, m400gz probe  
 date: Sep 12 2009 sweep width: 27174Hz acq.time: 2.0s relax.time: 0.1s # scans: 512 dig.res.: 0.2 Hz/pt hz/mm: 113.2  
 file: /mnt/d600/home13/westmr/mrdata/DATA\_FROM\_NMRSERVICE/ten-ku/2009.09.12.m4\_kk-2-185\_19:20\_C13\_1D.fid  
 Processing: 82pt

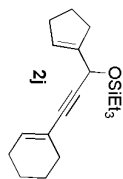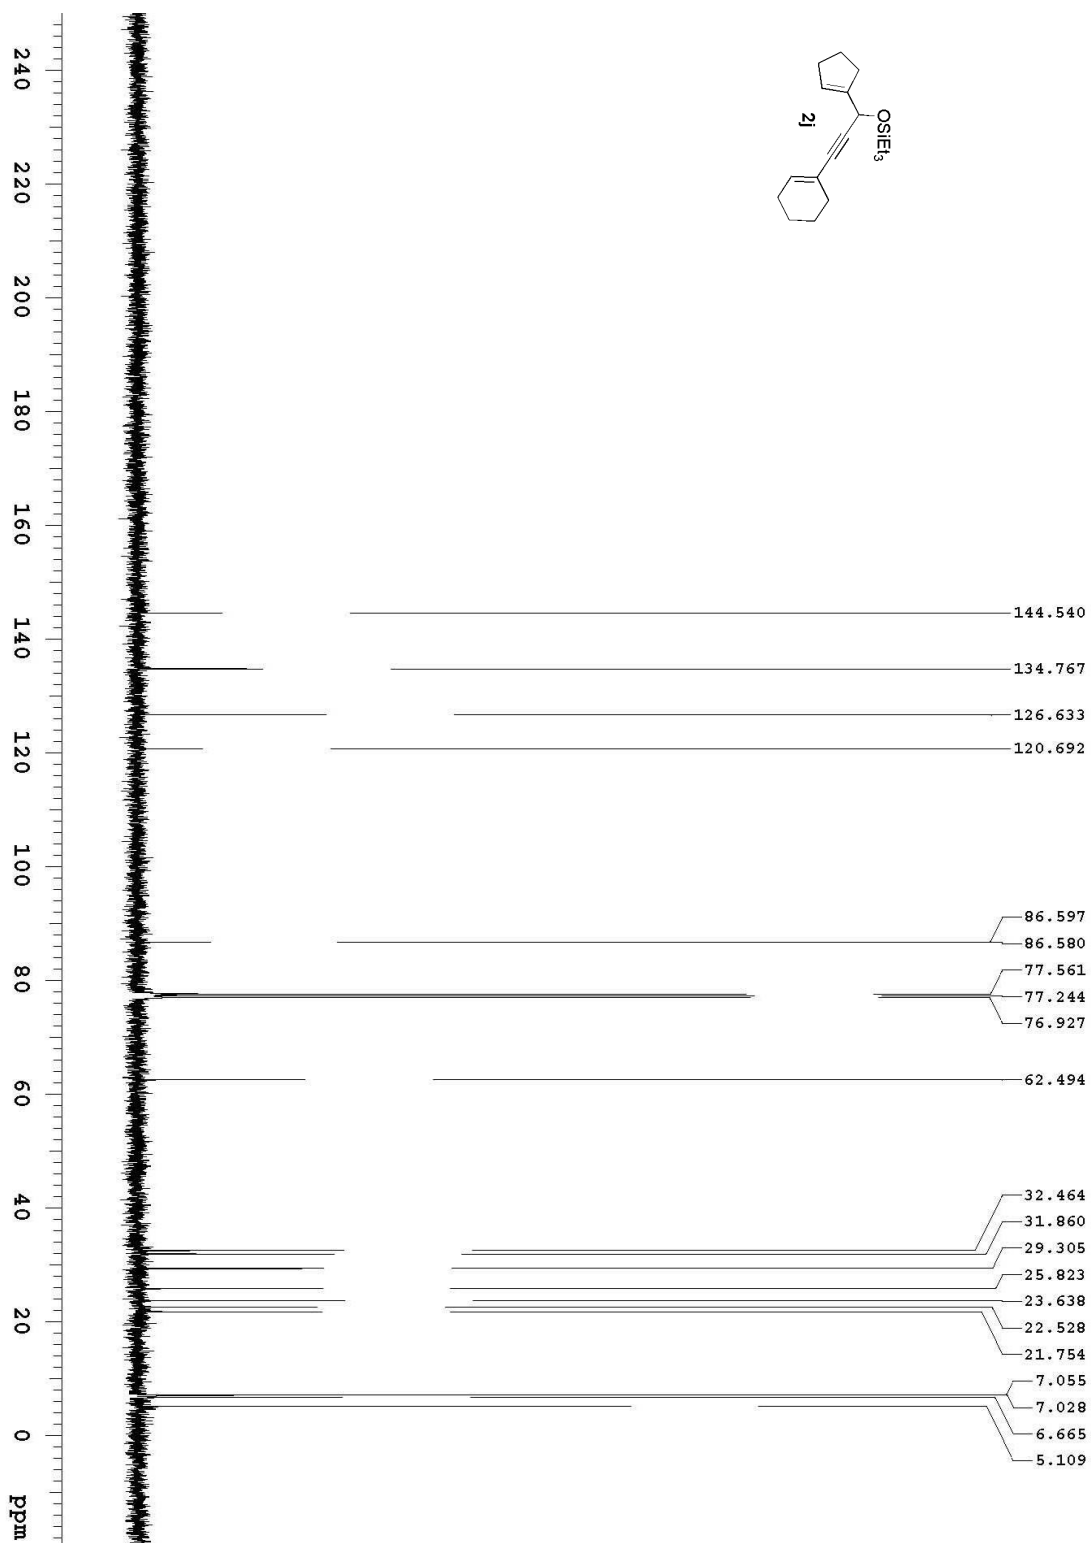

Yen-Ku, YKW-2-5-m4  
 400.393 MHz H1 1D in cdcl3 (ref. to CDCl3 @ 7.26 ppm), temp 27.0 C -> actual temp = 27.0 C, m400gz probe  
 Pulse Sequence: szpul1

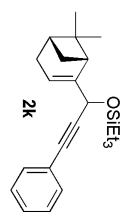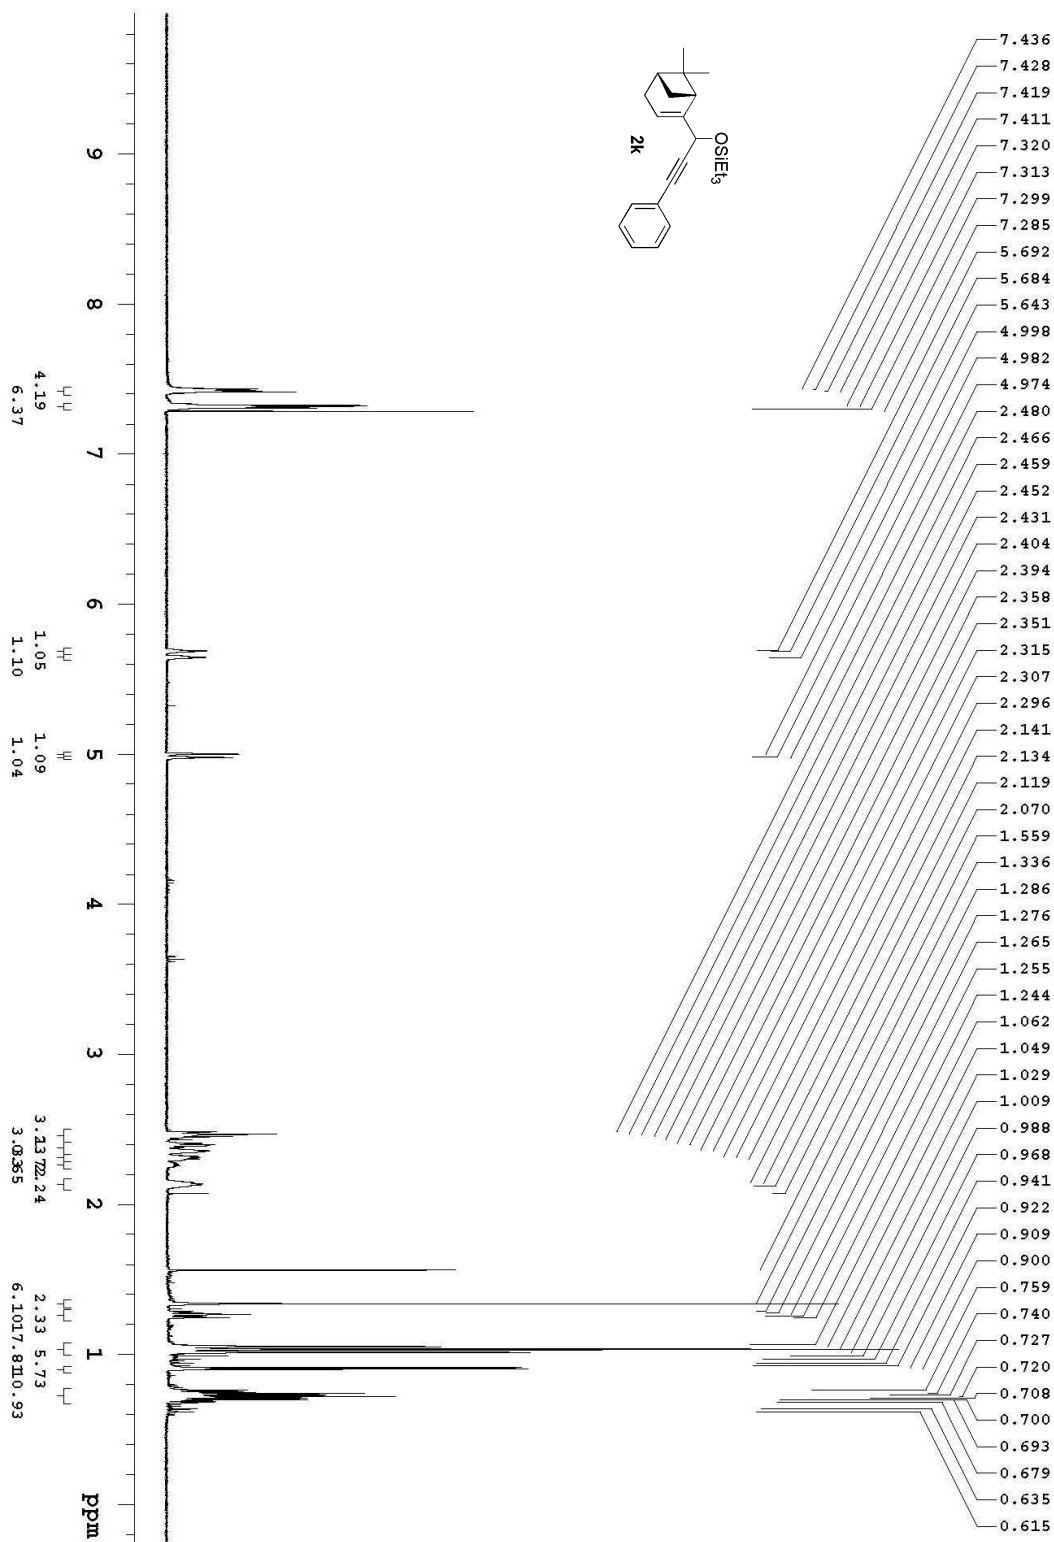



Yen-Ku, YKW-2-13-m4  
 400.393 MHz H1 ID in cdcl3 (ref. to CDCl3 @ 7.26 ppm), temp 27.0 C -> actual temp = 27.0 C, m400gz probe  
 Pulse Sequence: s2pul

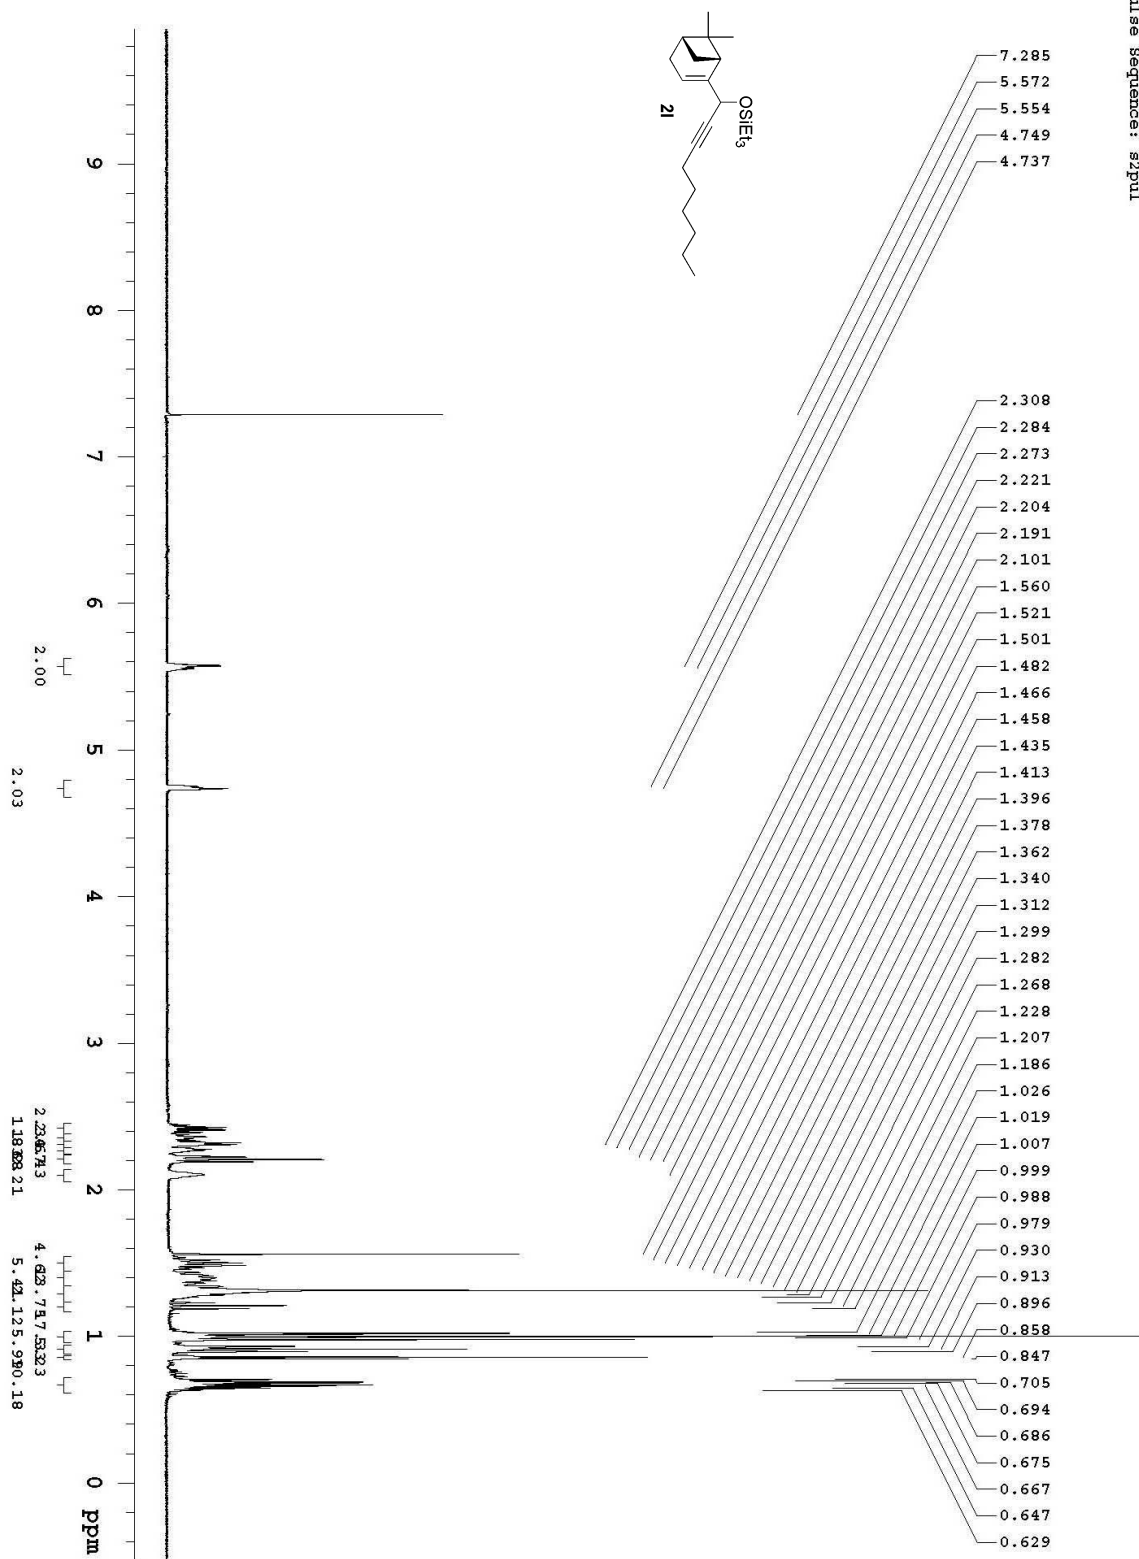

100.690 MHz <sup>13</sup>C{<sup>1</sup>H} 1D in cdcl<sub>3</sub> (ref. to CDCl<sub>3</sub> @ 77.06 ppm), temp 27.0 C -> actual temp = 27.0 C, m400gz probe  
 date: Jun 26 2009 sweep width: 27174Hz acq. time: 2.0s relax. time: 0.1s # scans: 800 dig. res.: 0.2 Hz/pt hz/mm: 113.2  
 Ref: 100.690 MHz 1D file: mnt/d600/home13/westmrf/nmrdata/DATA\_FROM\_NMRSERVICE/Yen-Ku/2009.06/2009.06.26.m4\_YKw-2-13-m4\_06:05\_C13\_1D.fid

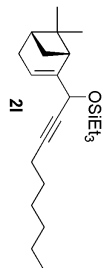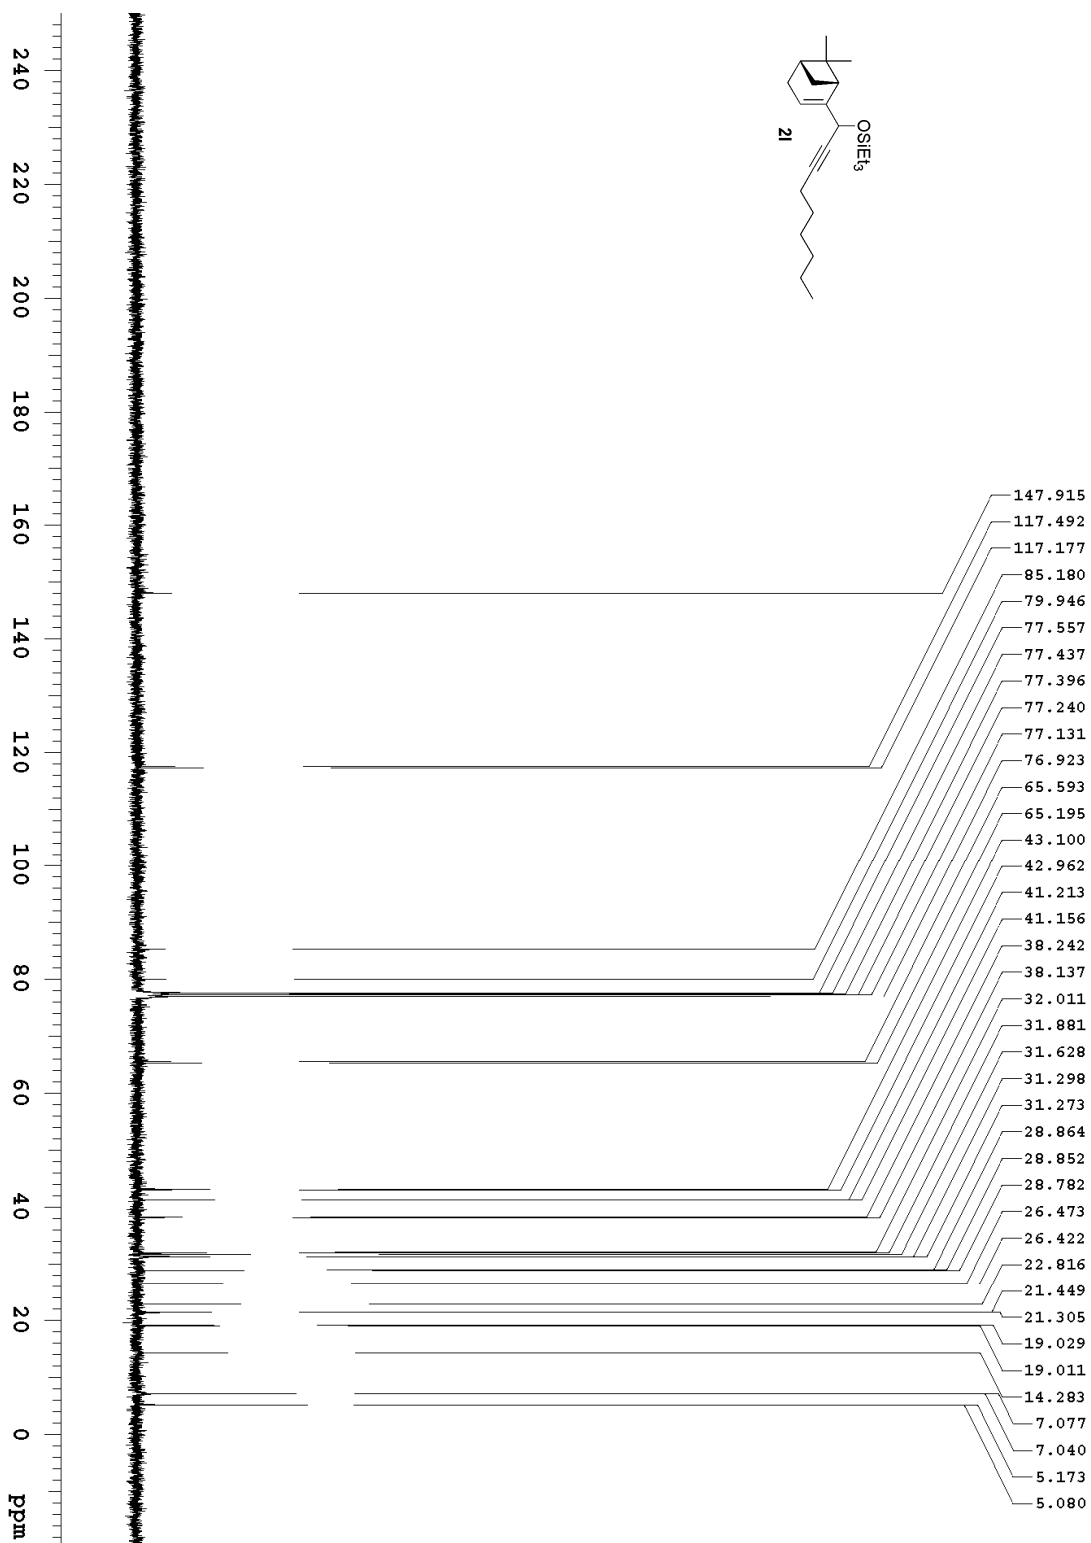

Yen-Ku, YKW-1-65-1  
 400.393 MHz <sup>1</sup>H ID in cdcl<sub>3</sub> (ref. to CDCl<sub>3</sub> @ 7.26 ppm), temp 27.0 C -> actual temp = 27.0 C, m400gz probe  
 Pulse Sequence: szpul

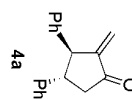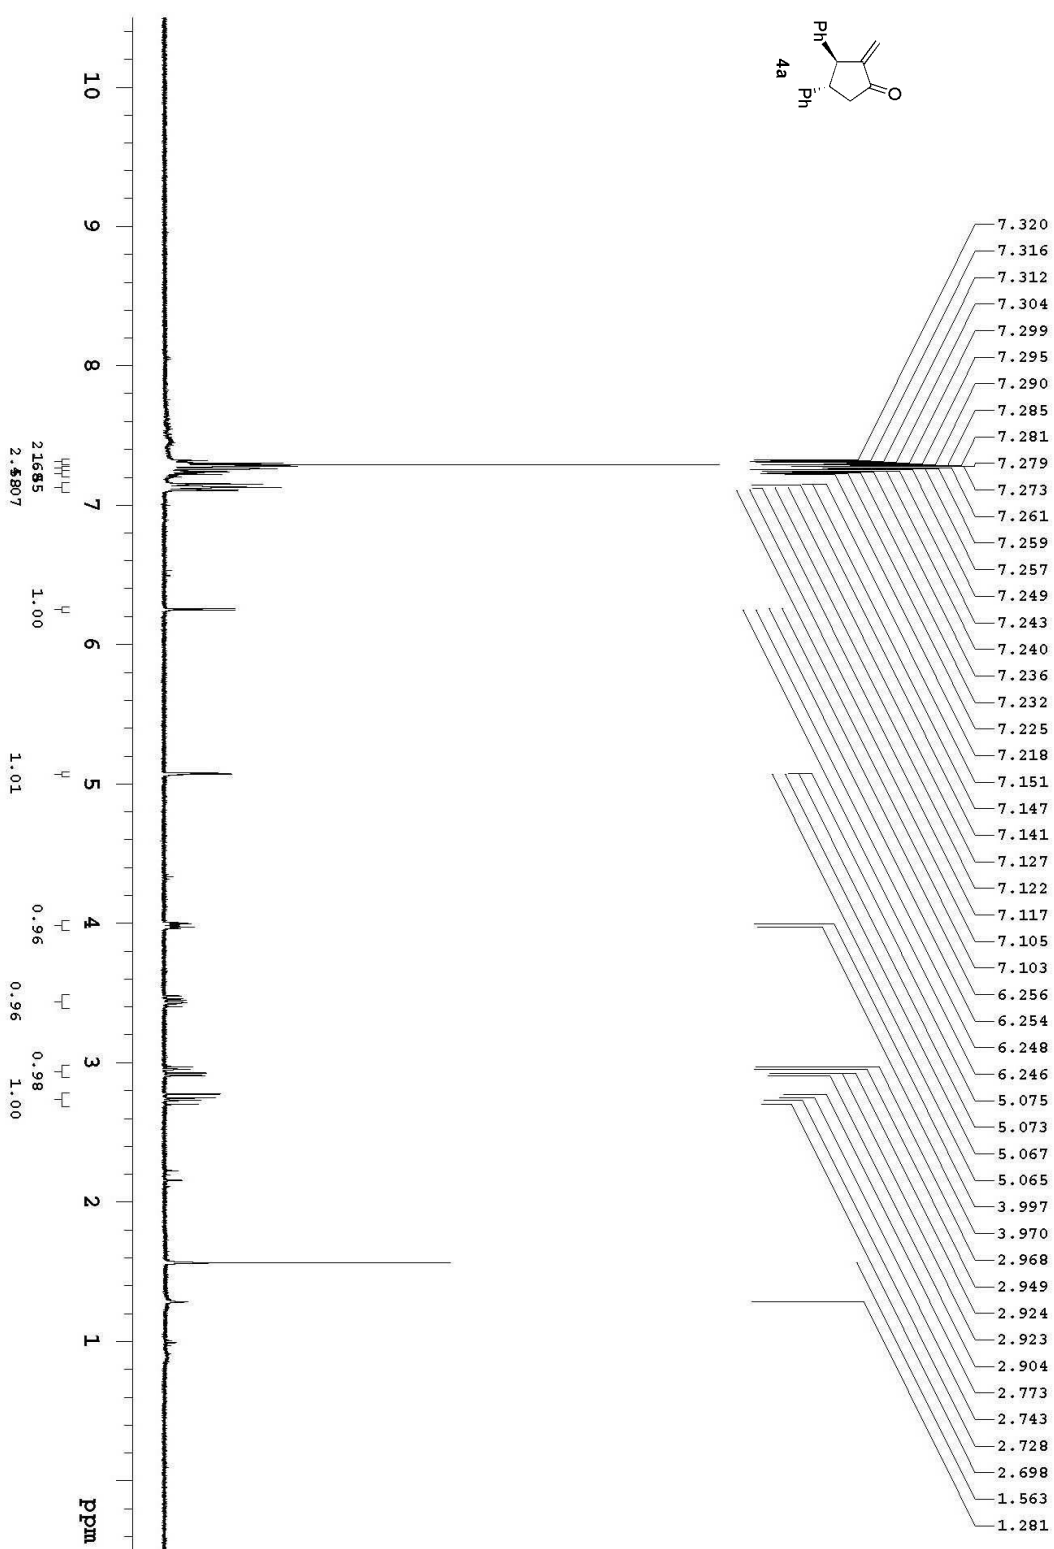

100.690 MHz <sup>13</sup>C{<sup>1</sup>H} 1D in cdcl<sub>3</sub> (ref. to CDCl<sub>3</sub> @ 77.06 ppm), temp 27.0 C -> actual temp = 27.0 C, m400gz probe  
 date: Oct 26 2009 sweep widch: 27174Hz acq time: 2.0s relax time: 0.1s # scans: 1024 dig.res.: 0.2 Hz/pt hz/mm: 113.2  
 Refs: 100.690 MHz 1D file: mnt/d600/home13/westmr/1mrdcl3/DATA\_FROM\_NMRSERVICE/Yen-Ku/2009.10/2009.10.26.m4\_YK-3-65-exo\_18:39\_C13\_1D.fid

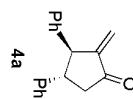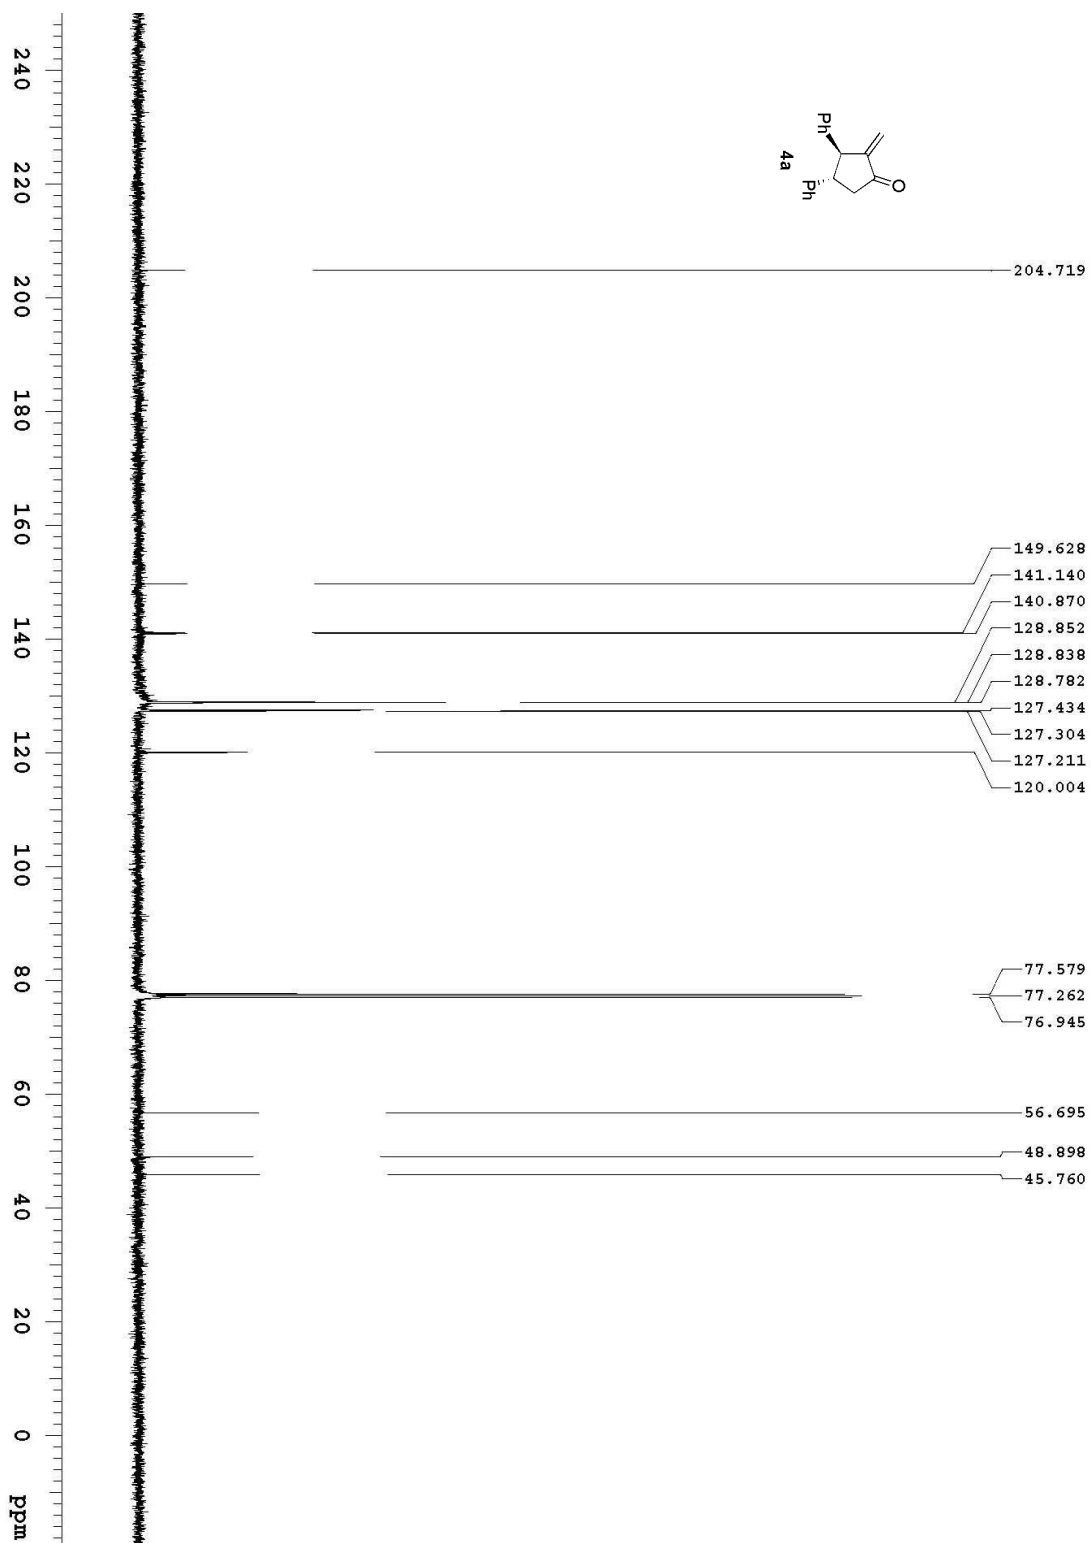



Yen-Ku, YKW-1-65-3-H  
 400.393 MHz H1 1D in cdcl3 (ref. to CDCl3 @ 7.26 ppm), temp 27.0 C -> actual temp = 27.0 C, m400gz probe  
 Pulse Sequence: szpul

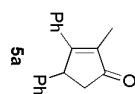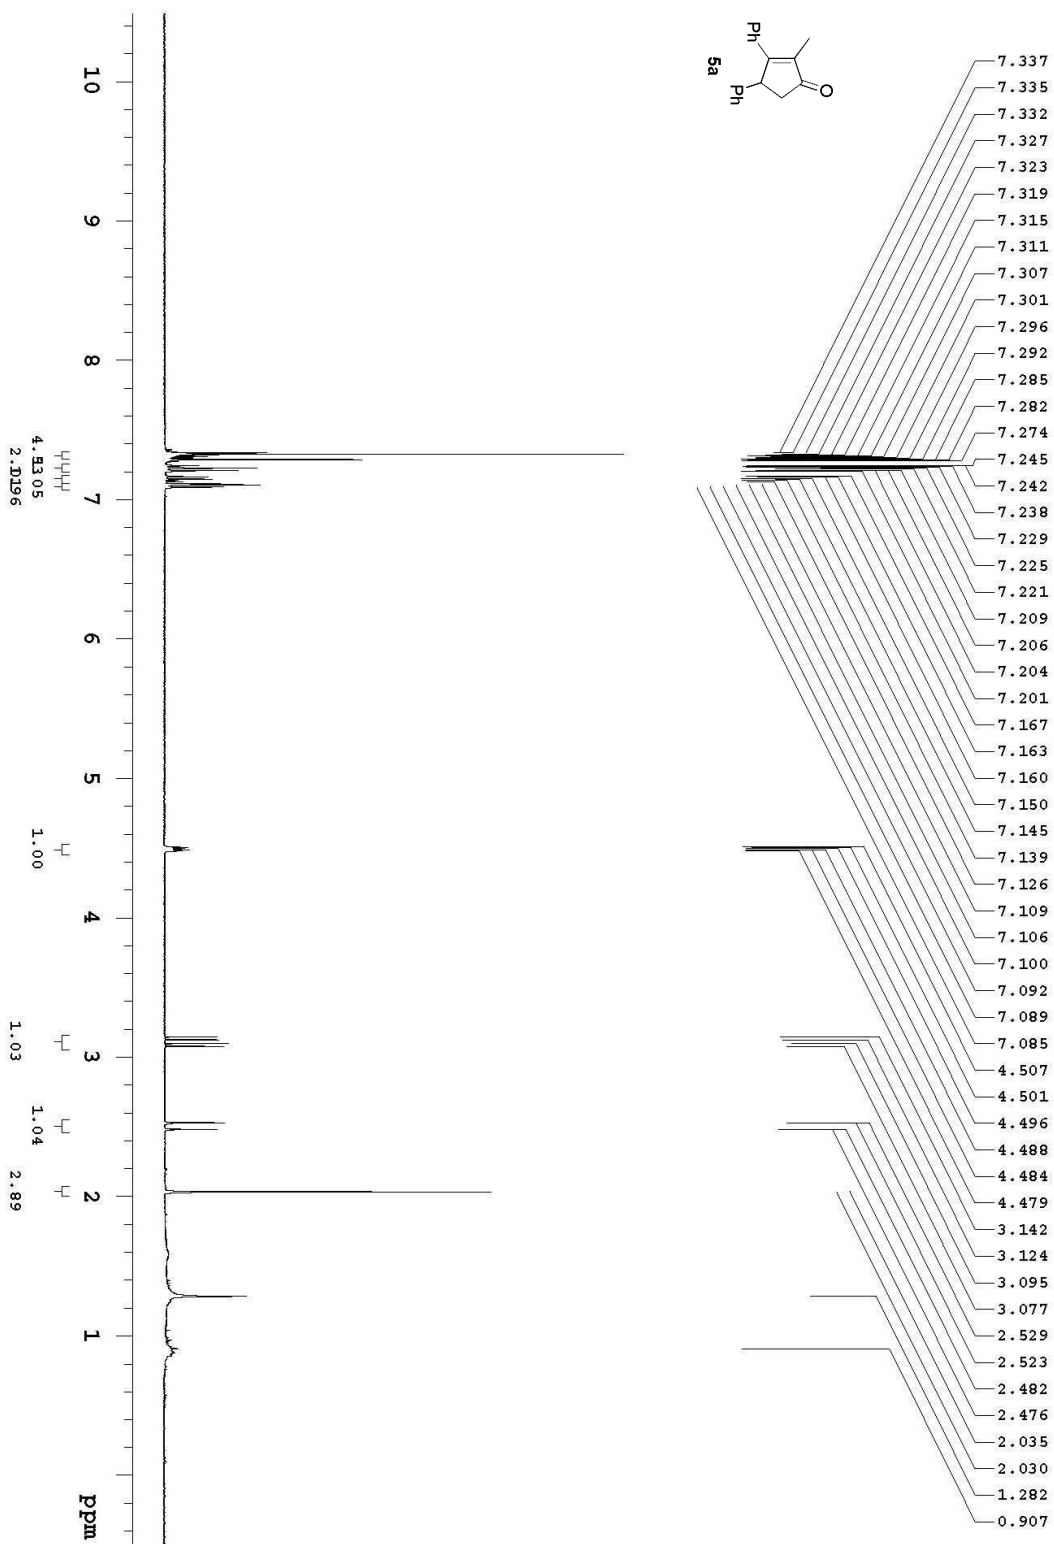

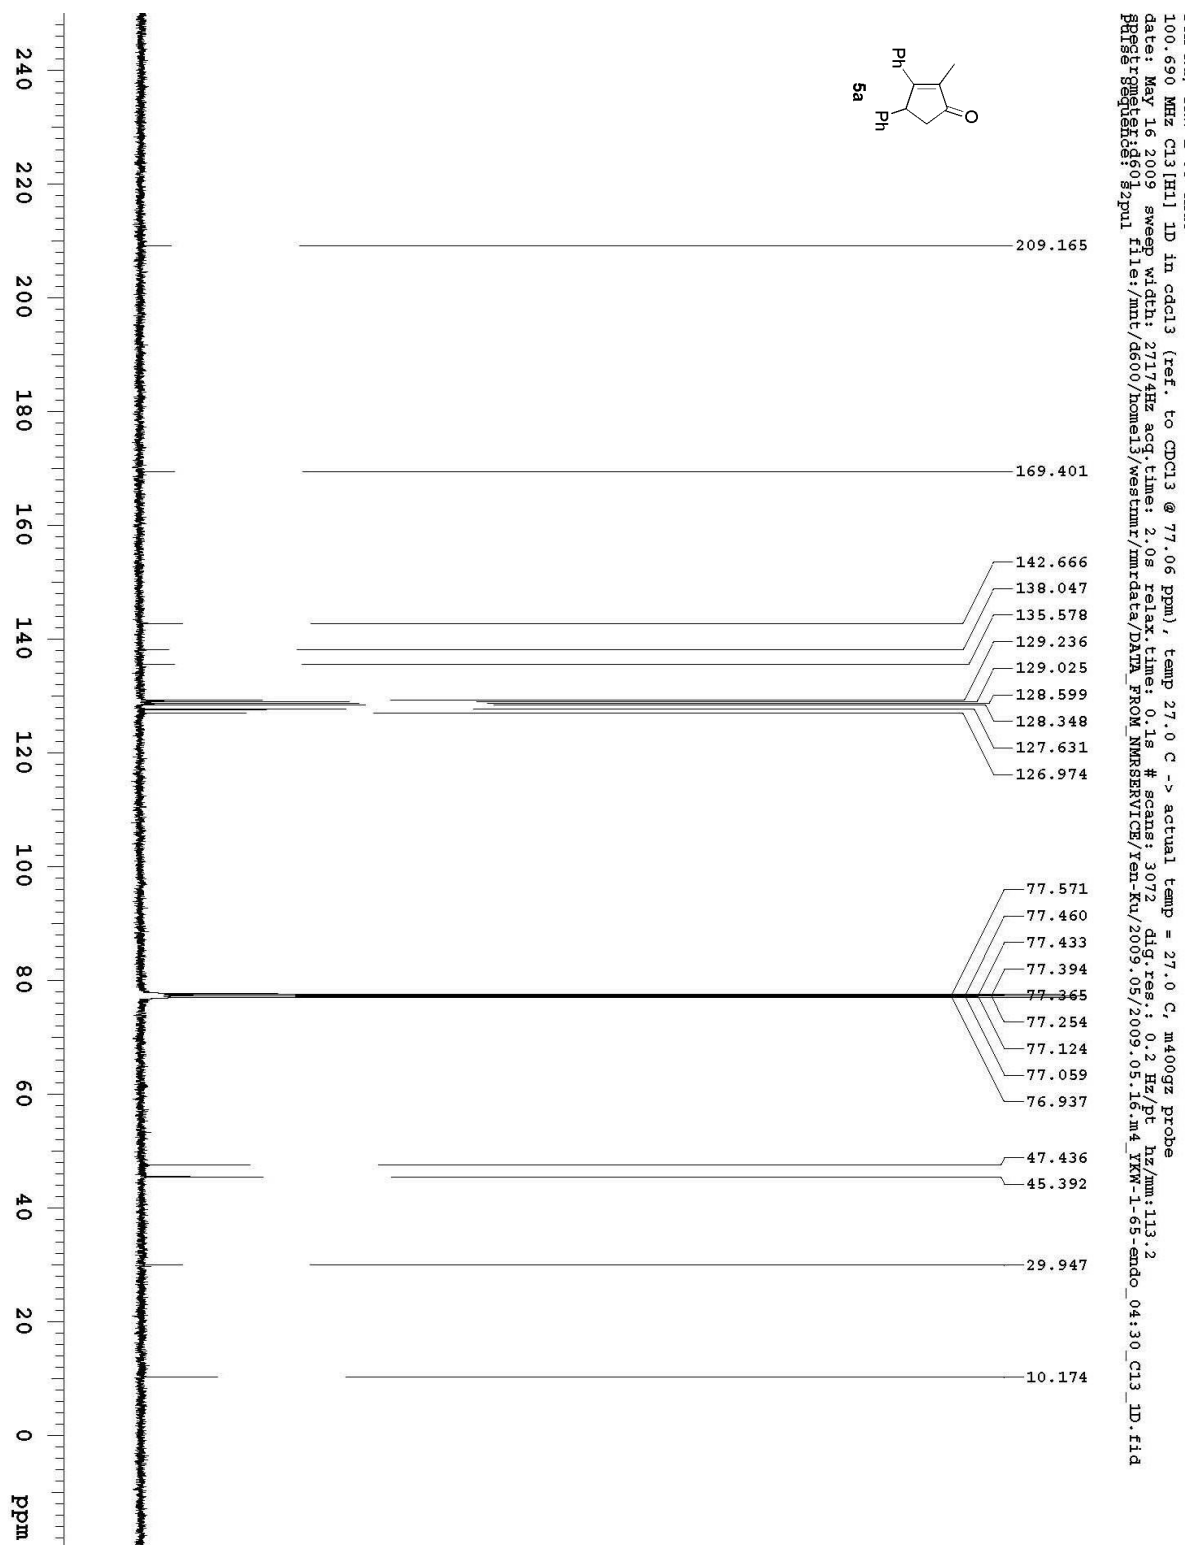

Yen-Ku, YMW-1-141-F3-M4  
 400.393 MHz H1 ID in cdcl3 (ref. to CDCl3 @ 7.26 ppm), temp 27.0 C -> actual temp = 27.0 C, m400gz probe  
 Pulse Sequence: s2pul

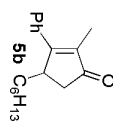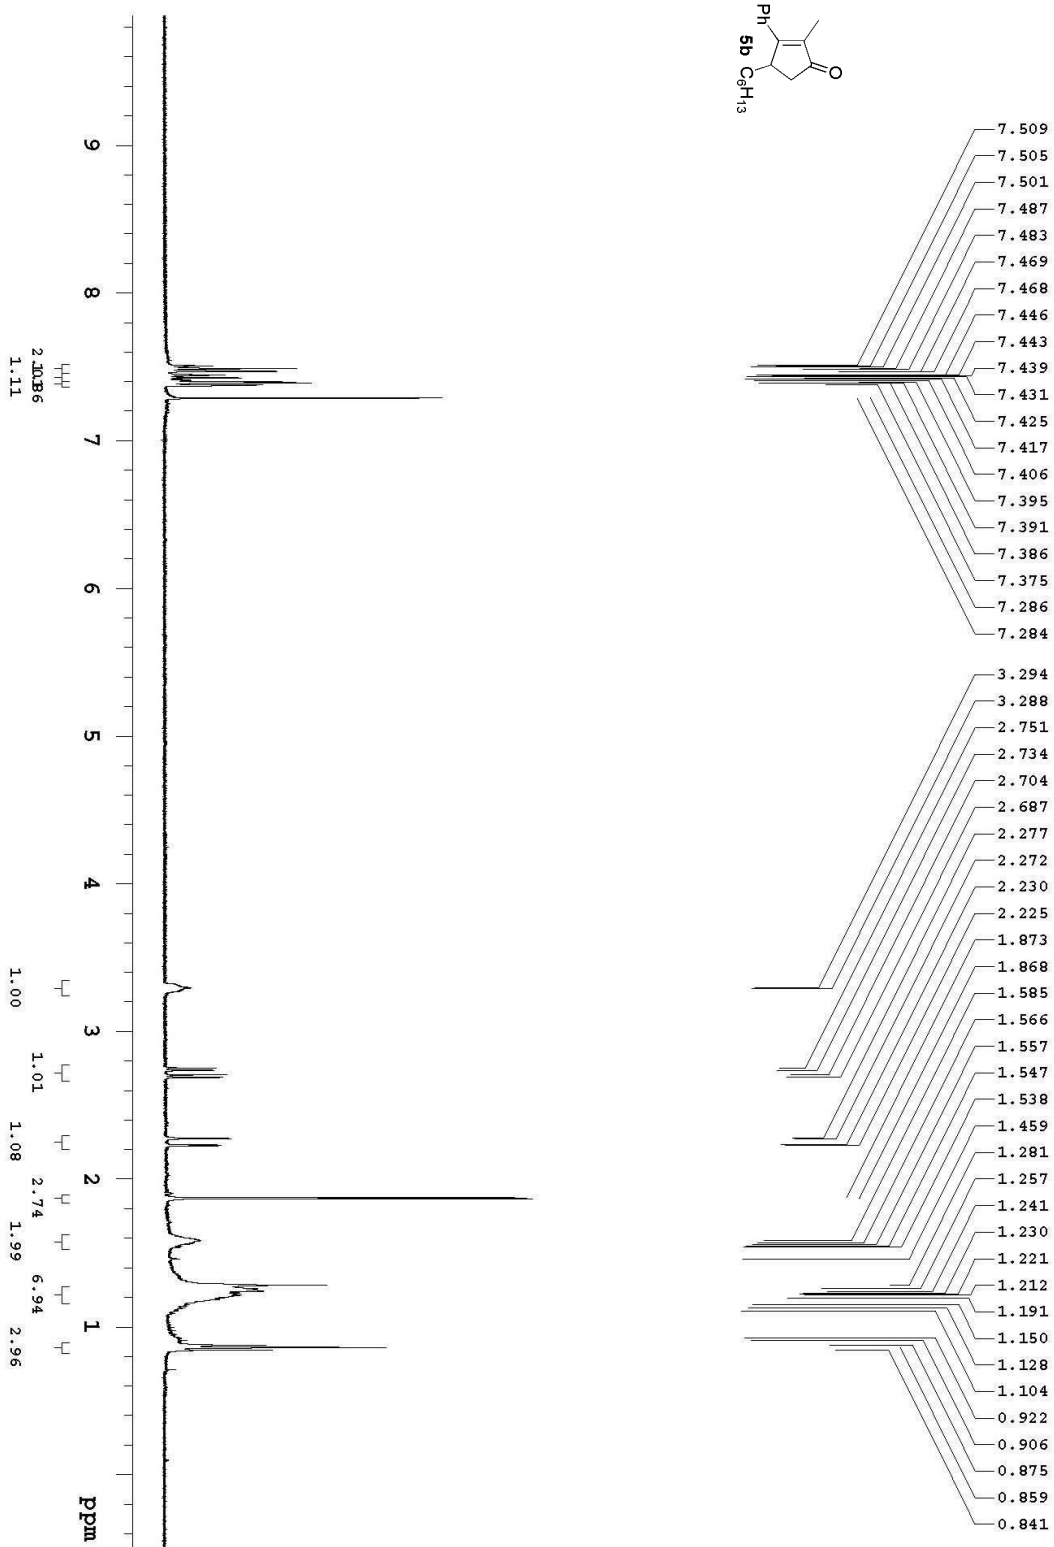

Pulse Sequence: apt

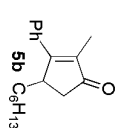

Yen-Ku Wu, YKW-1-173-F2  
 498.122 MHz H1 1D in cdcl3 (ref. to CDCl3 @ 7.26 ppm), temp 27.2 C -> actual temp = 27.0 C, autoxdb probe  
 Pulse Sequence: szpul

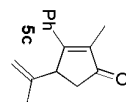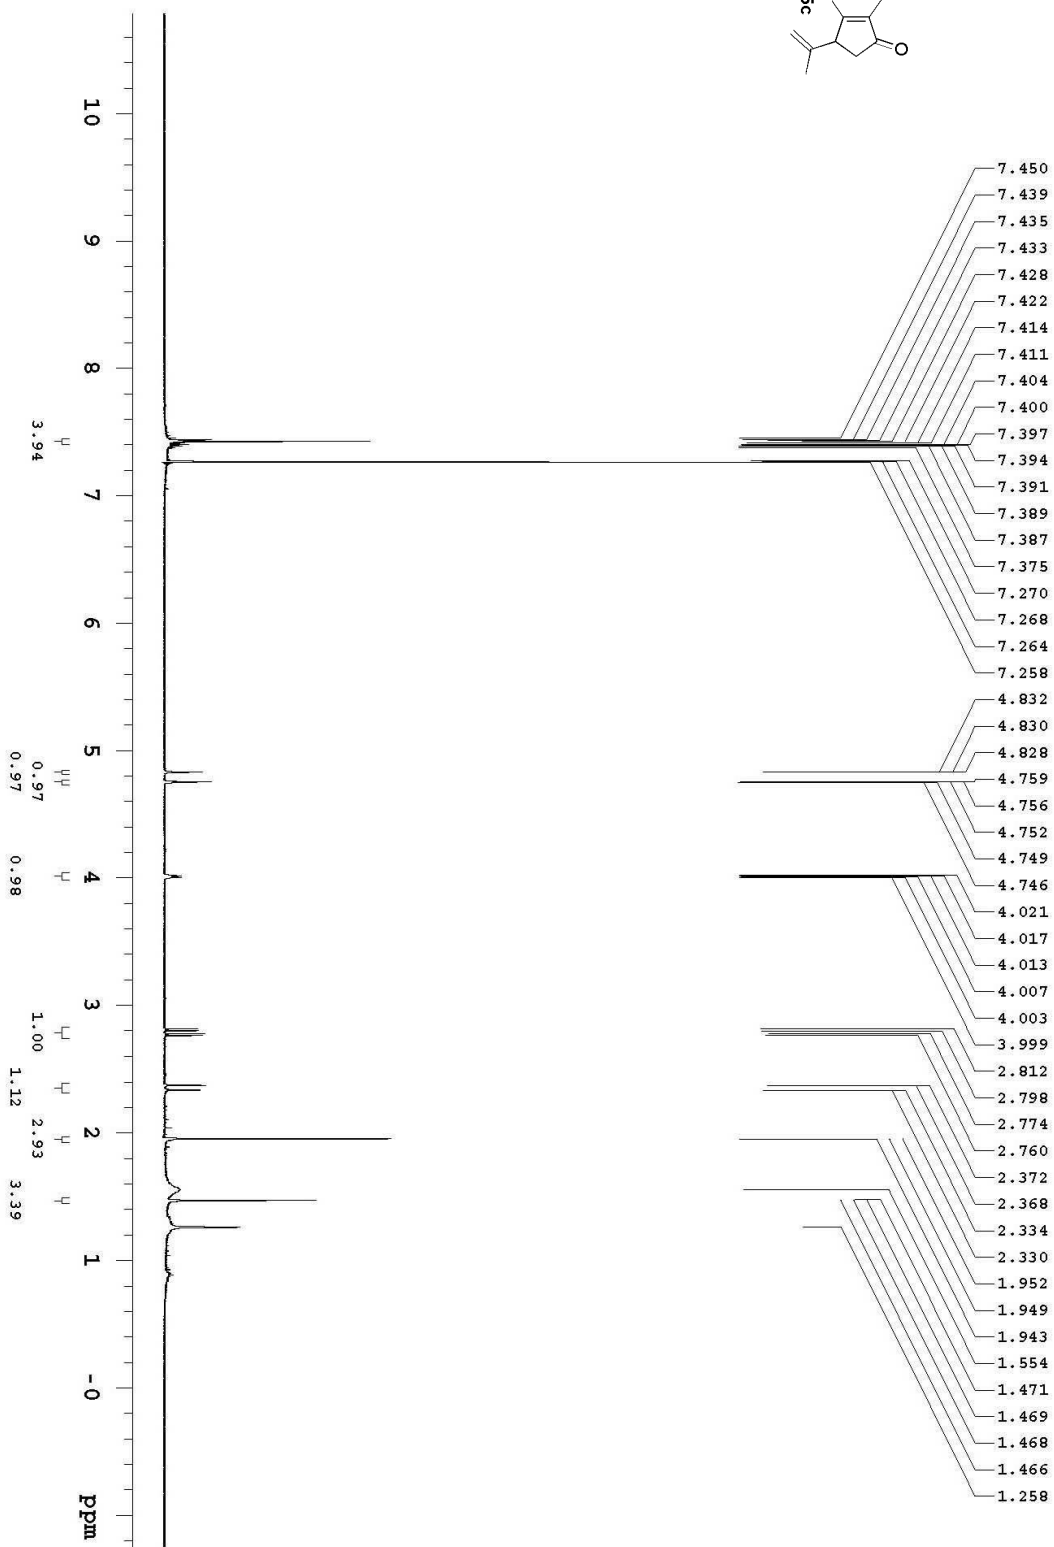

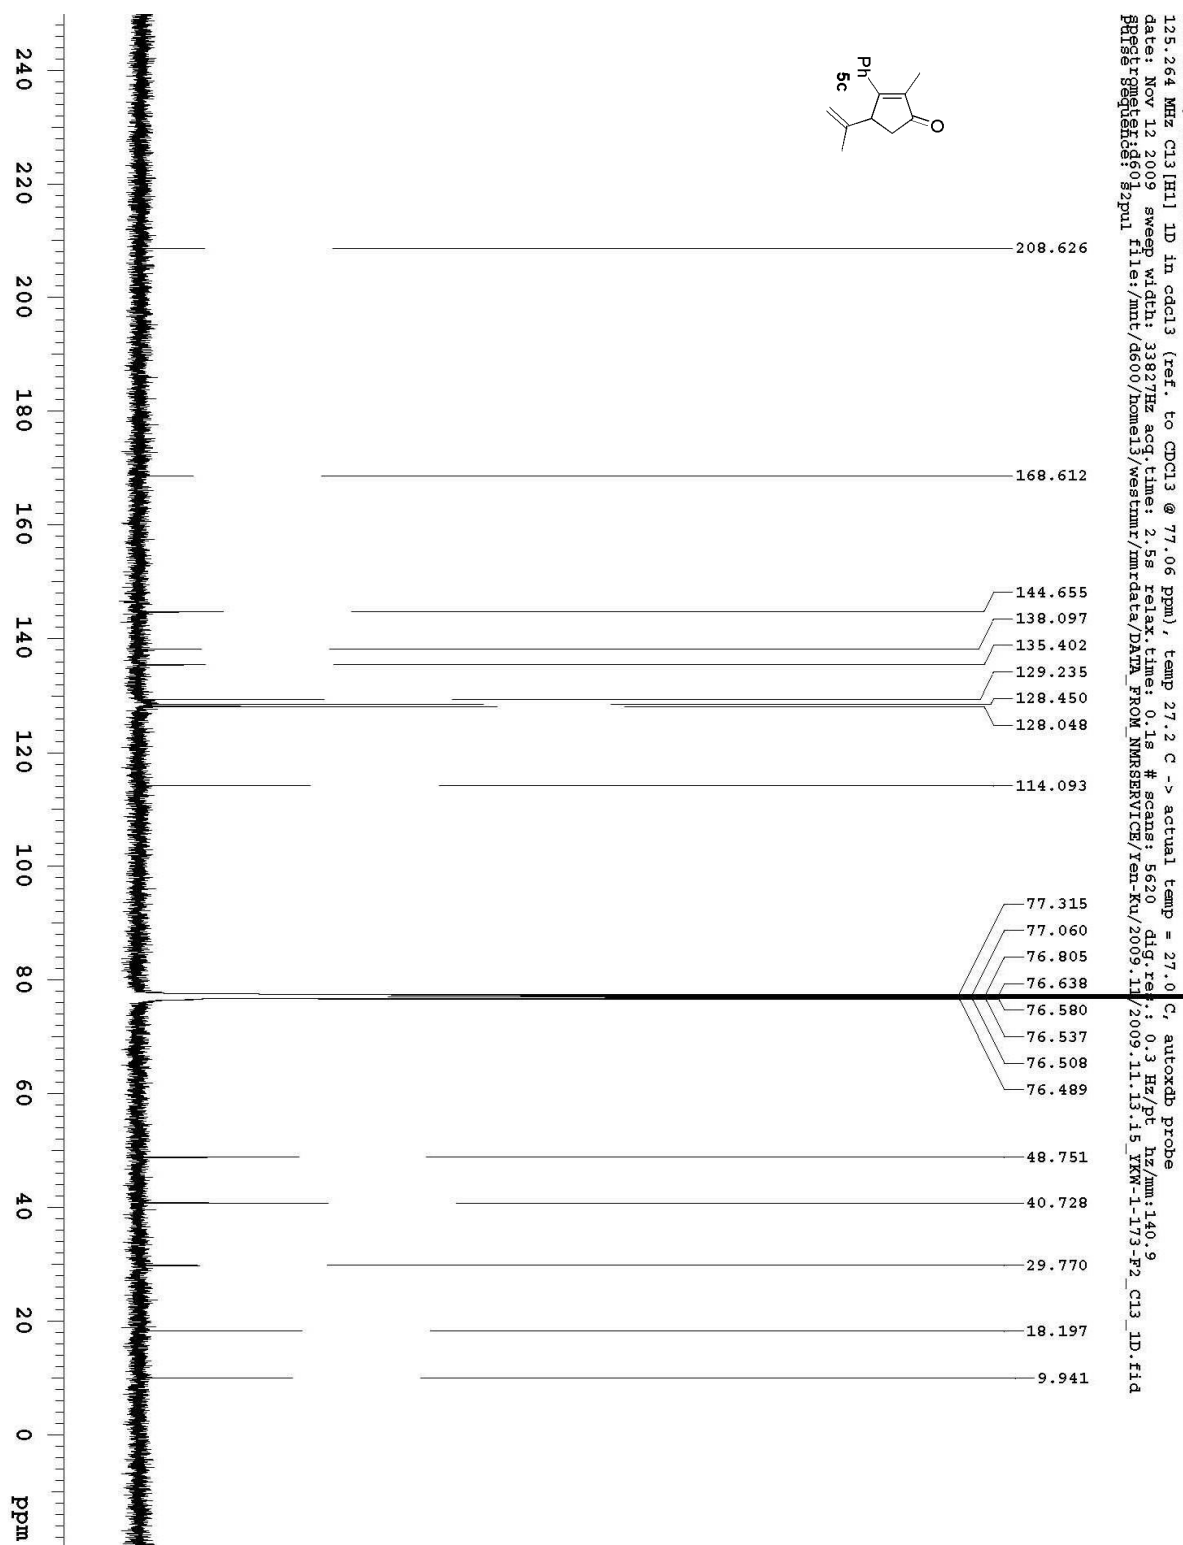

Yen-Ku, YKW-2-79-F2-H  
 400.393 MHz H1 ID in cdcl3 (ref. to CDCl3 @ 7.26 ppm), temp 27.0 C -> actual temp = 27.0 C, m400gz probe  
 Pulse Sequence: szpul

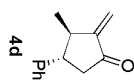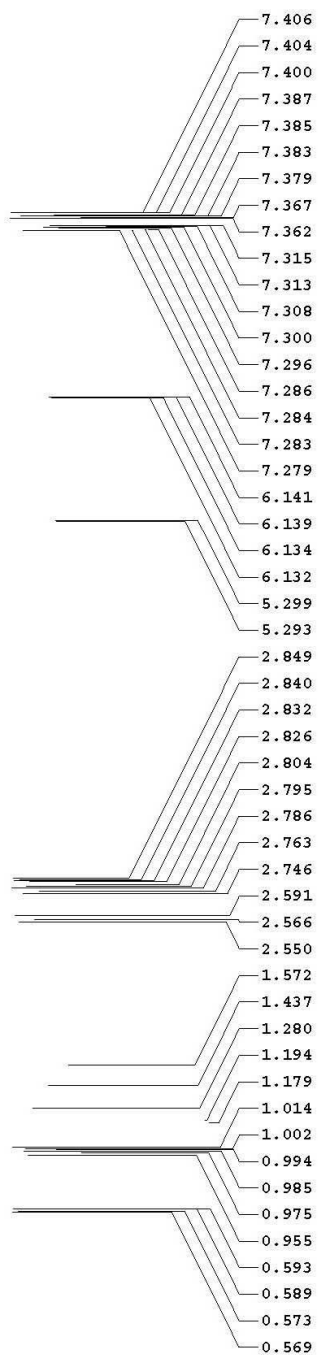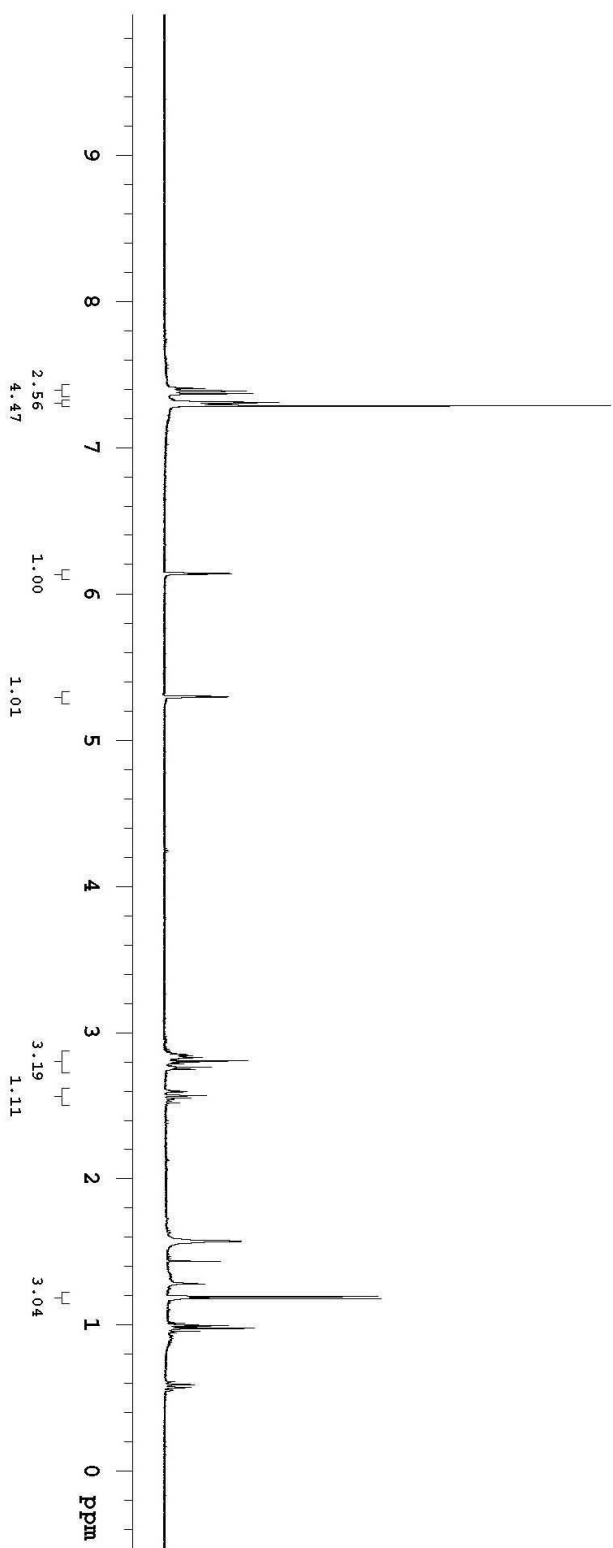





Yen-Ku, YKN-2-79-F3  
 400.393 MHz <sup>1</sup>H ID in cdcl<sub>3</sub> (ref. to CDCl<sub>3</sub> @ 7.26 ppm), temp 27.0 C -> actual temp = 27.0 C, m400gz probe  
 Pulse Sequence: s2pul1

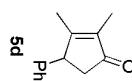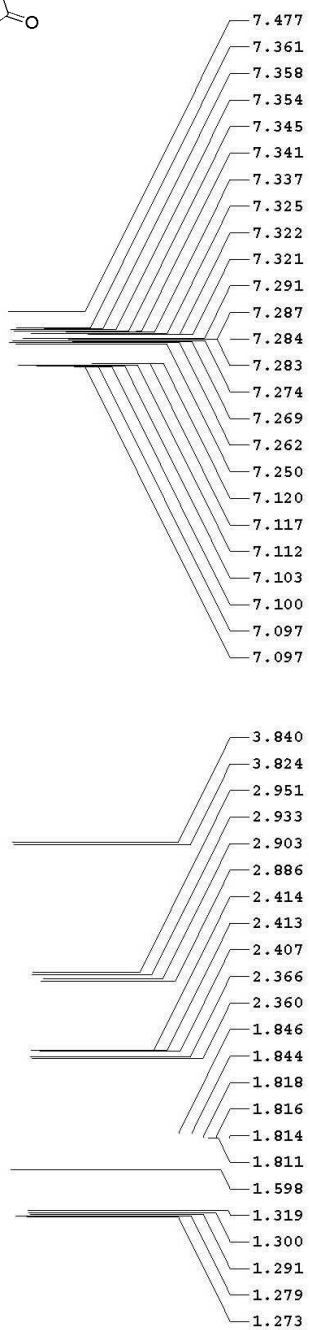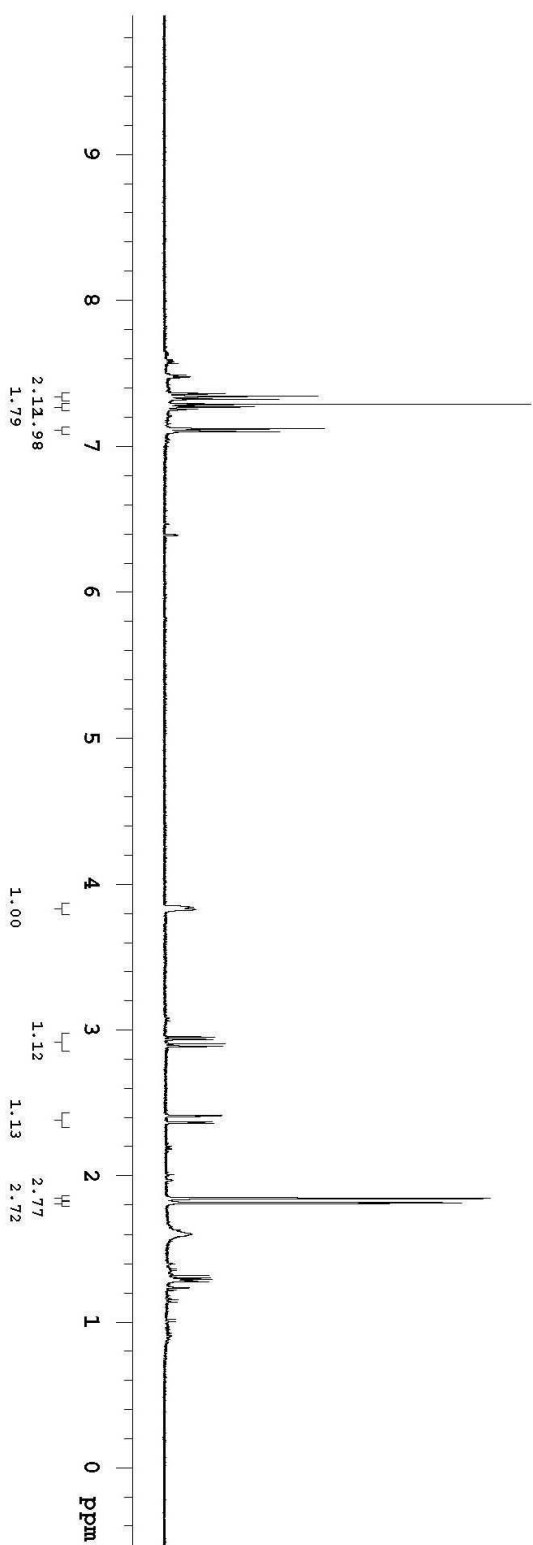

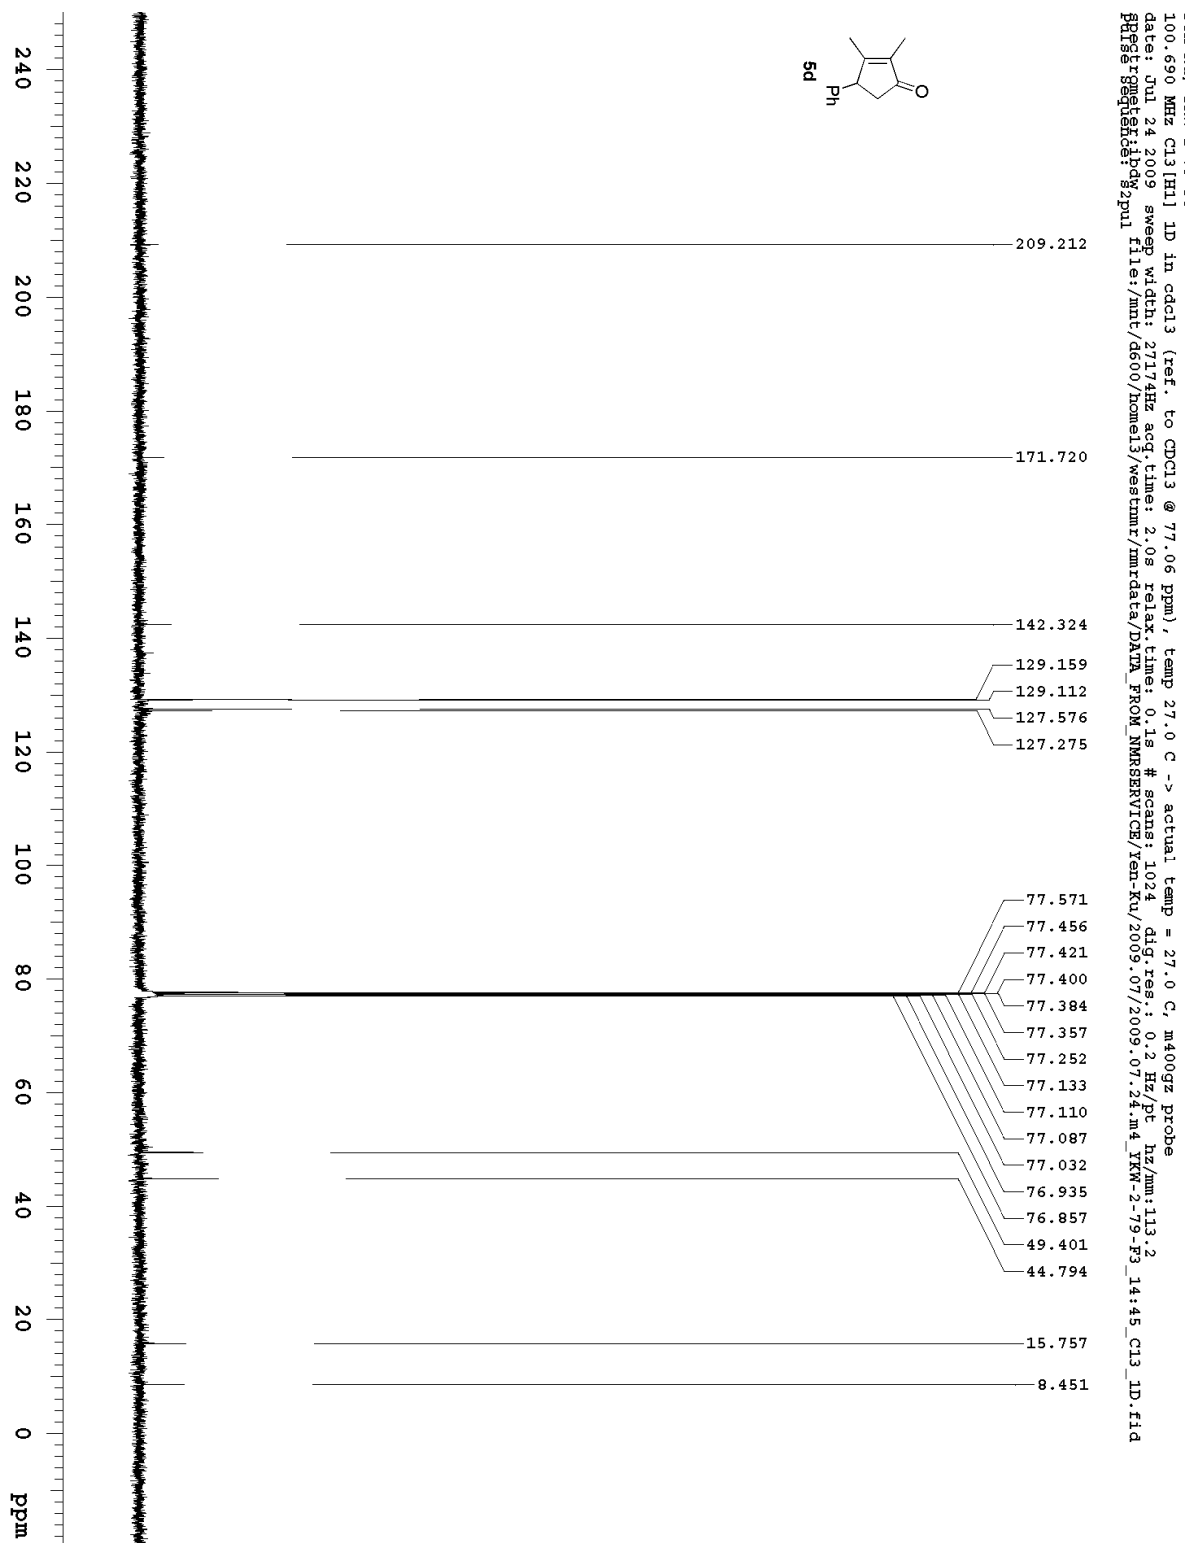

Yen-Ku, YKW-2-127-F3  
 400.393 MHz <sup>1</sup>H LD in cdcl<sub>3</sub> (ref. to CDCl<sub>3</sub> @ 7.26 ppm), temp 27.0 C -> actual temp = 27.0 C, m400gz probe  
 Pulse Sequence: s2pul

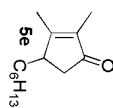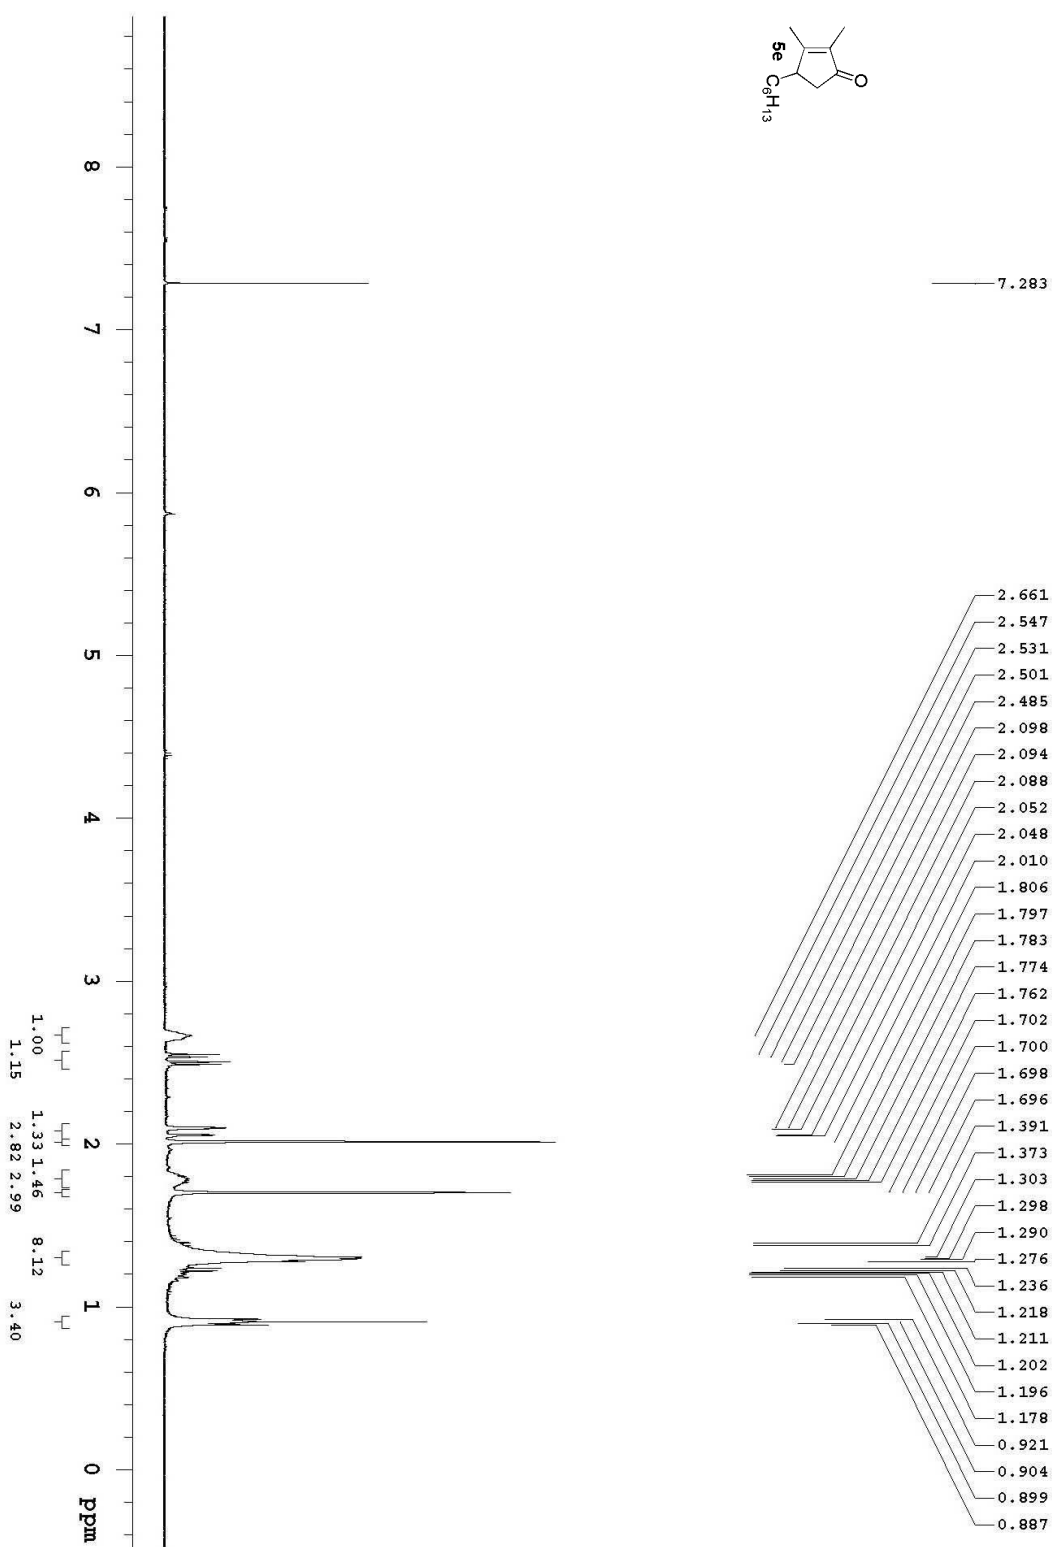

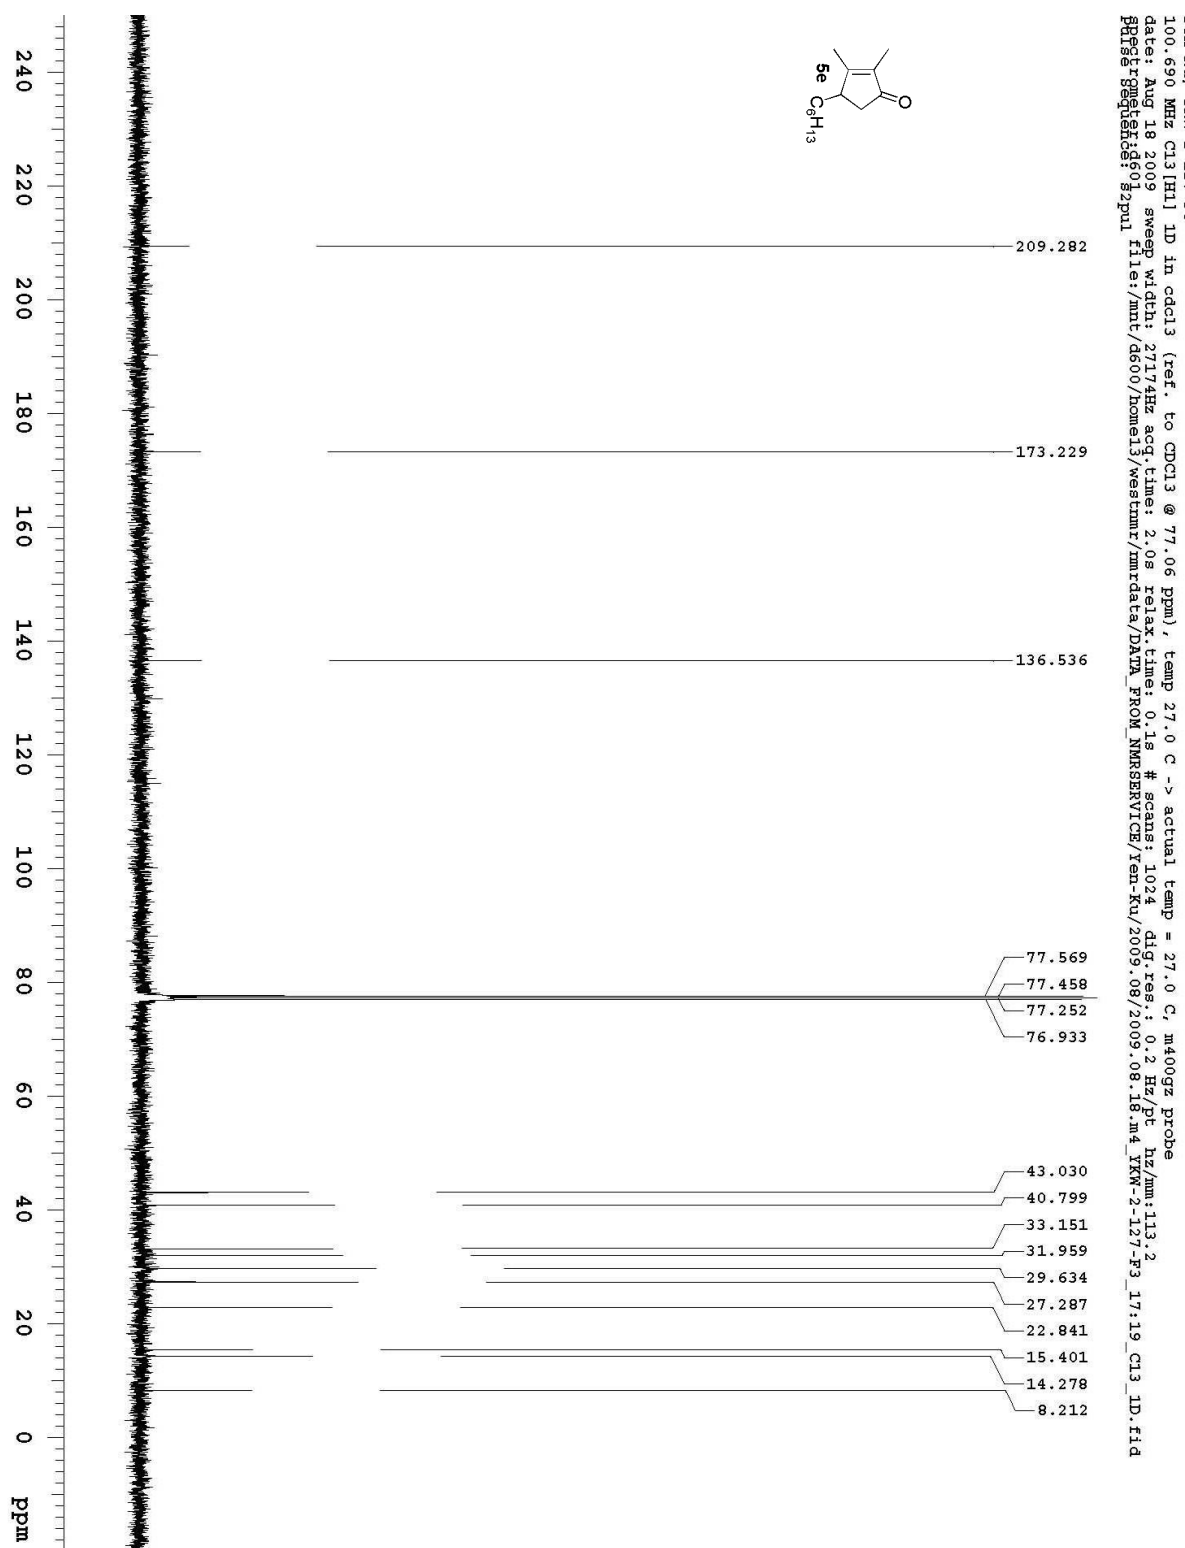

Yen-Ku, YKW-2-129-Product1  
 400.393 MHz <sup>1</sup>H 1D in cdcl3 (ref. to CDCl3 @ 7.26 ppm), temp 27.0 C -> actual temp = 27.0 C, m400gz probe  
 Pulse Sequence: s2pul

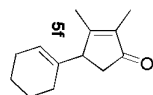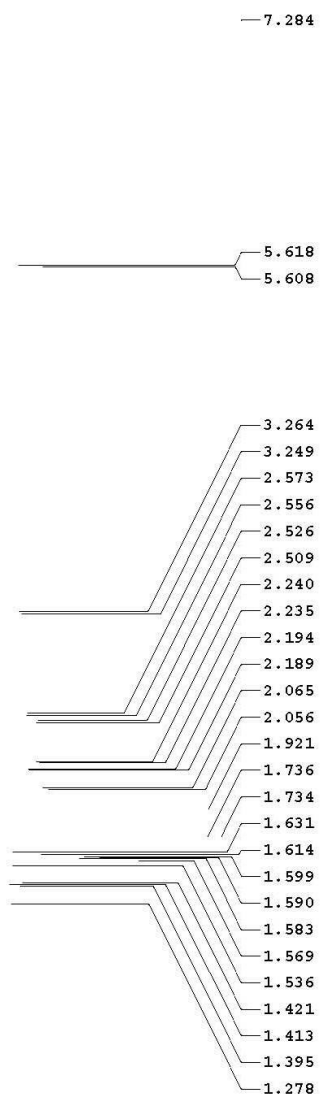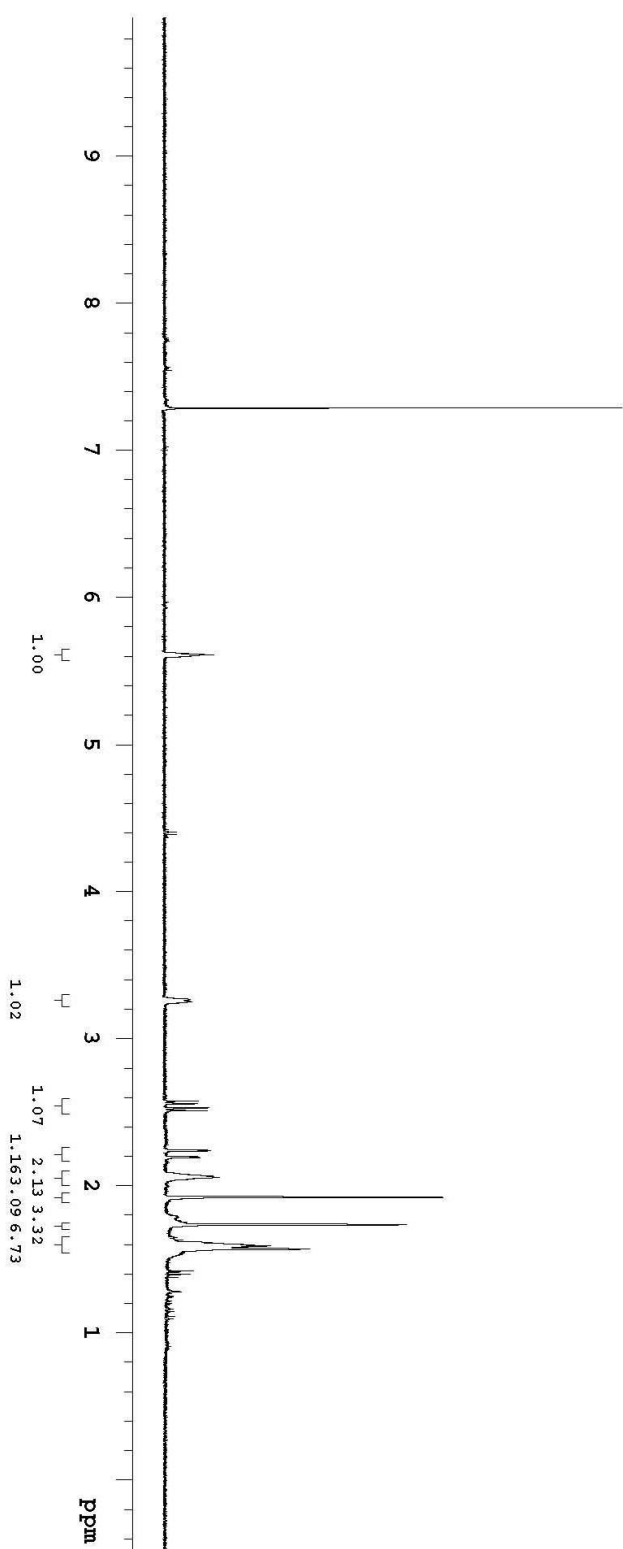

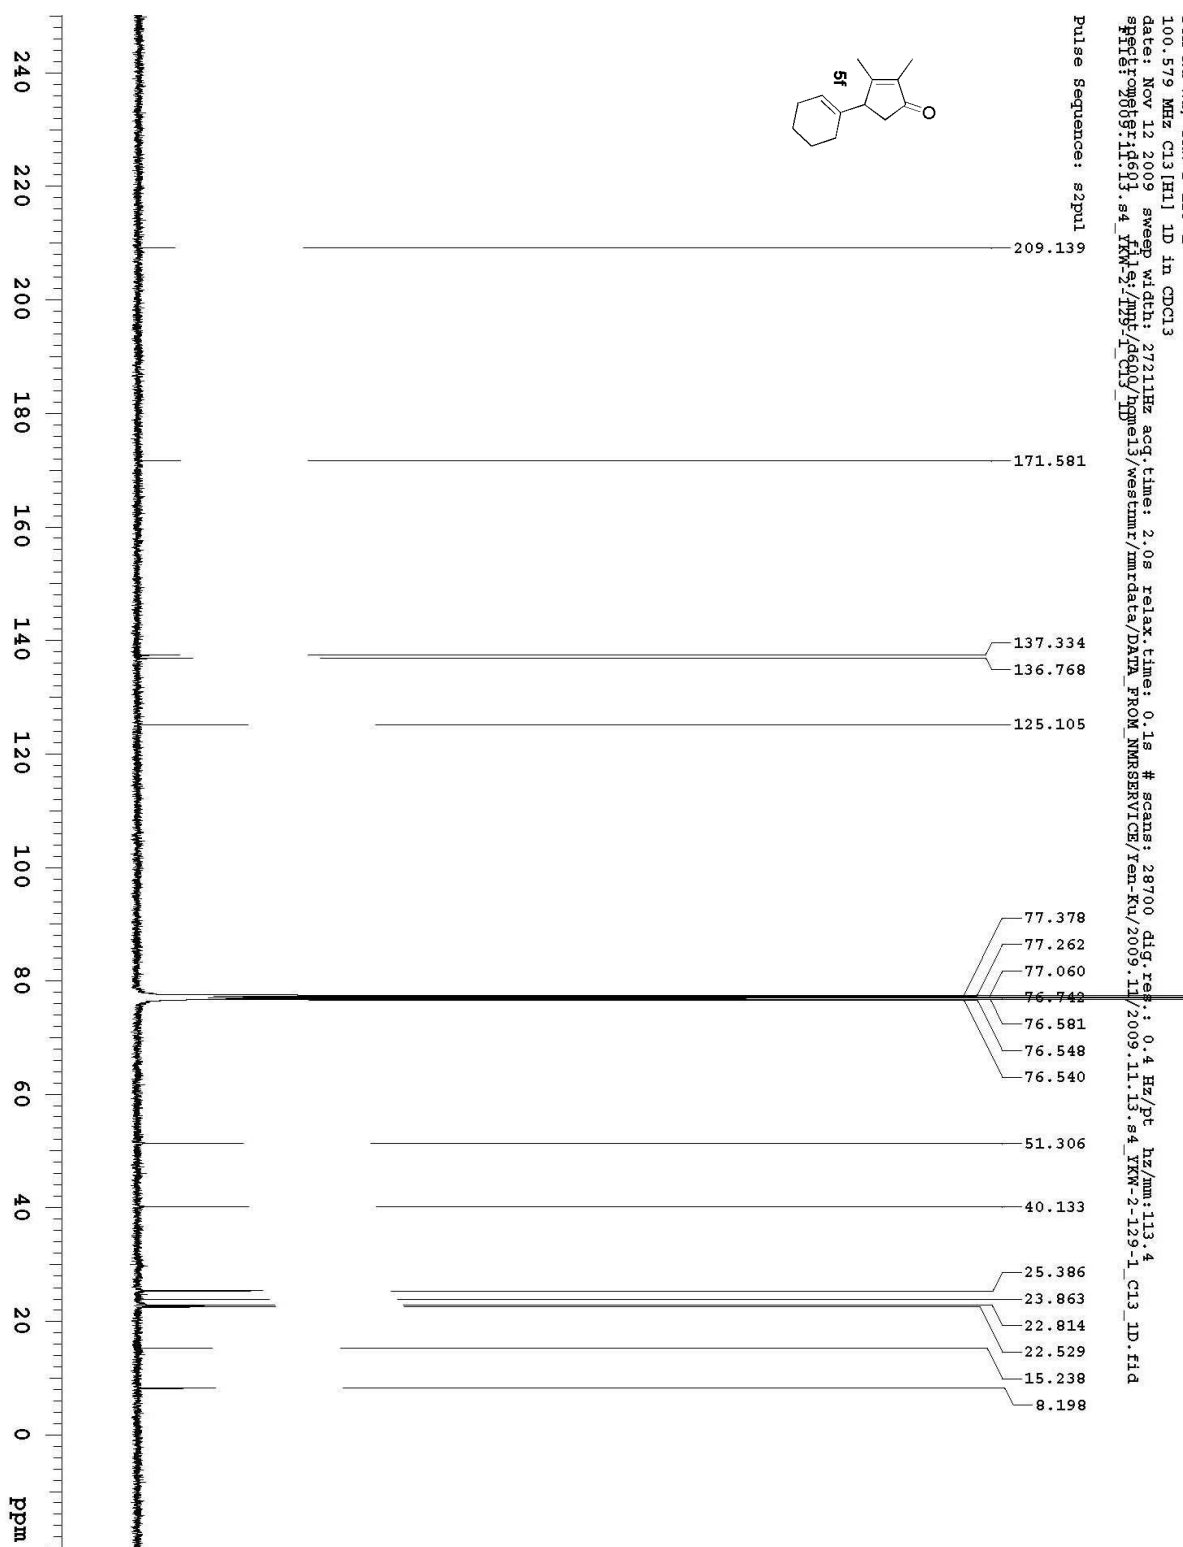

Yen-Ku, YKM-2-155-F2  
 400.393 MHz H1 ID in cdcl3 (ref. to CDCl3 @ 7.26 ppm) , temp 27.0 C -> actual temp = 27.0 C, m400gz probe  
 Pulse Sequence: s2pul

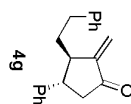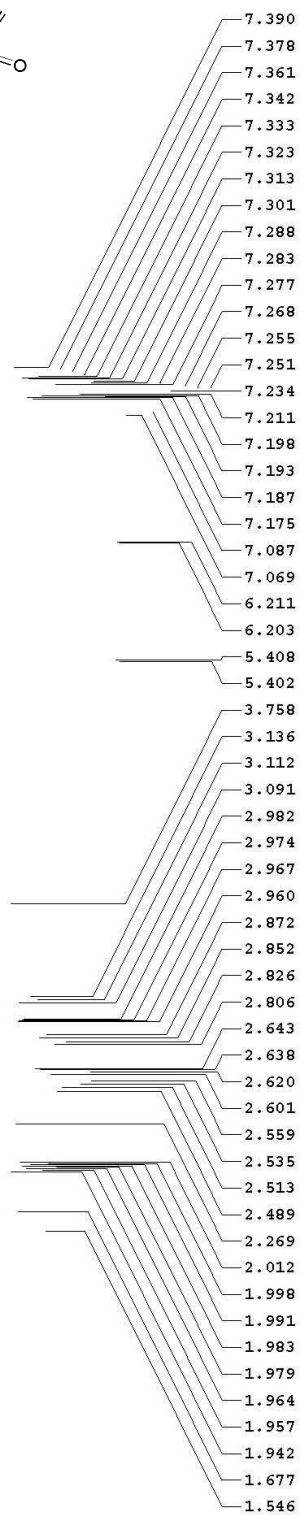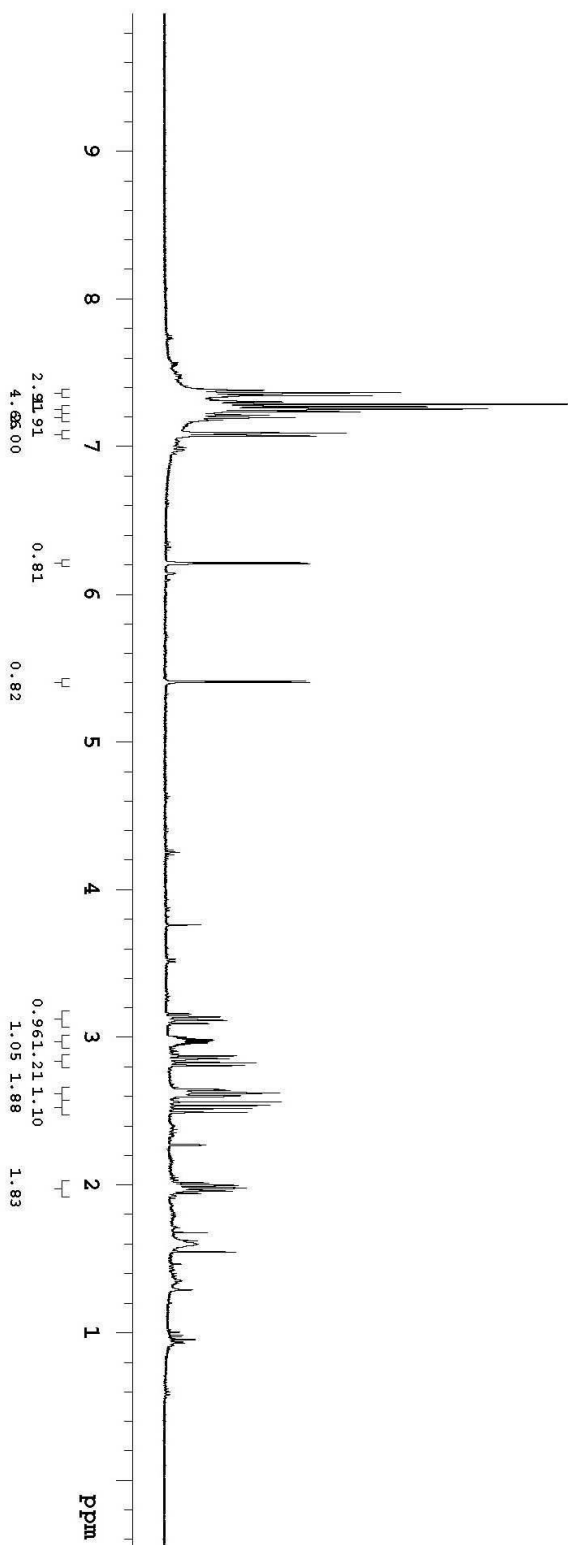

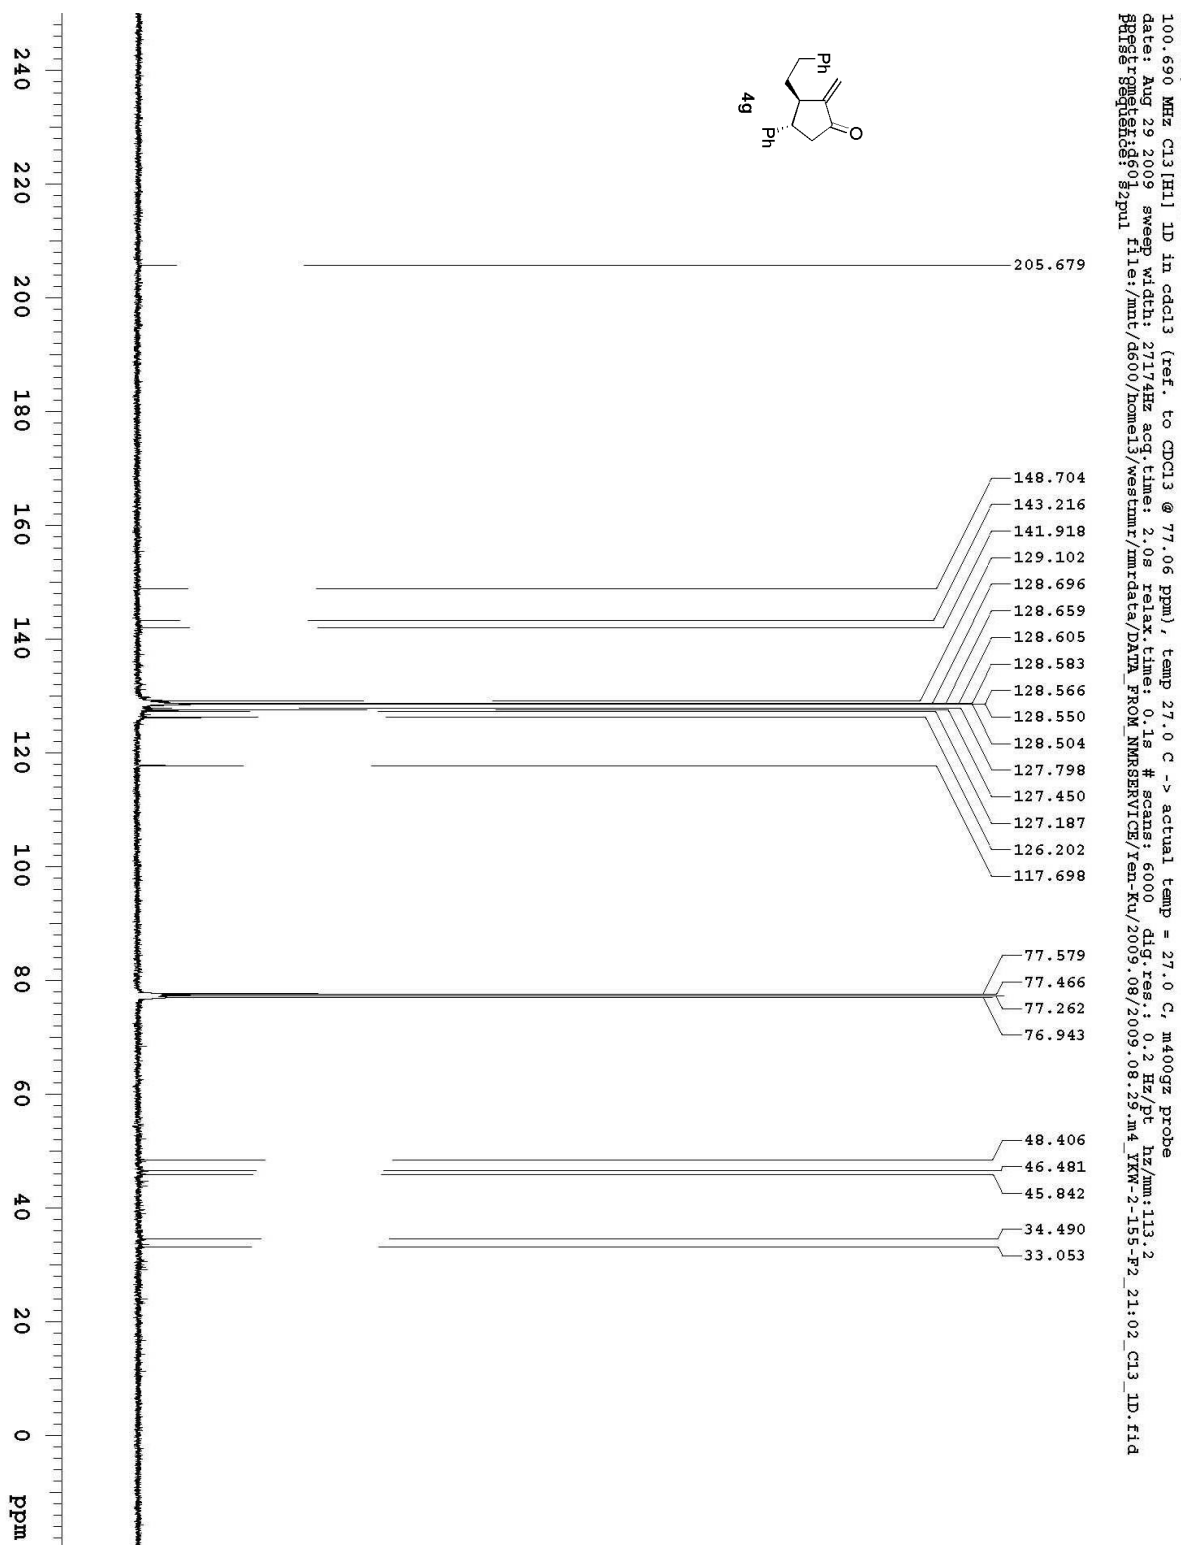



Yen-Ku, YKW-2-155-F3  
 400.393 MHz <sup>1</sup>H 1D in cdcl<sub>3</sub> (ref. to CDCl<sub>3</sub> @ 7.26 ppm), temp 27.0 C -> actual temp = 27.0 C, m400gz probe  
 Pulse Sequence: s2pul

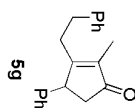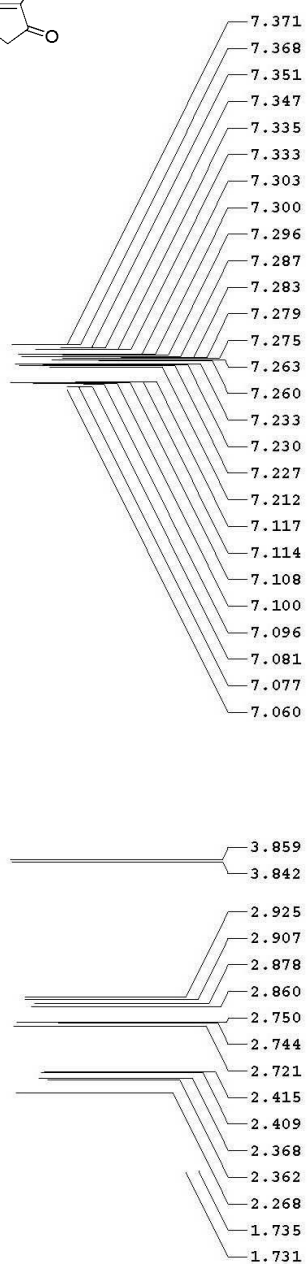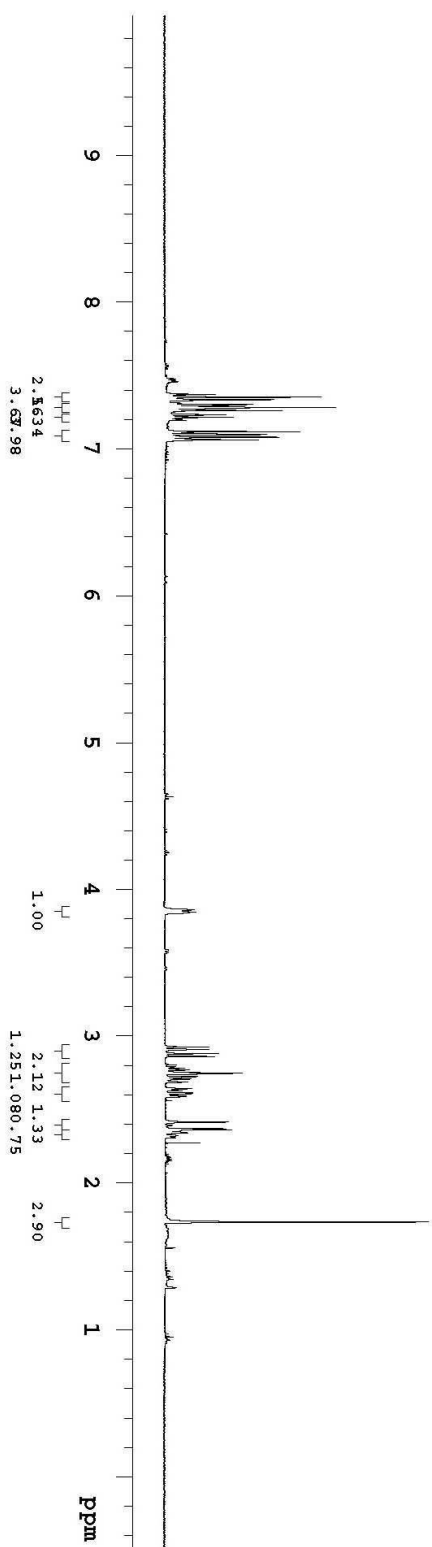

100.630 MHz <sup>13</sup>C{<sup>1</sup>H} 1D in cdcl<sub>3</sub> (ref. to CDCl<sub>3</sub> @ 77.06 ppm), temp 27.0 C -> actual temp = 27.0 C, m400gz probe  
 date: Aug 30 2009 sweep width: 27174Hz acq.time: 2.0s relax.time: 0.1s # scans: 6000 dig.res.: 0.2 Hz/pt hz/mm: 113.2  
 PRT: 8.88 sec F2 -> 1D file: /mnt/d600/home1/westmr/mrdata/DAIa\_FROM\_NMRSERVICE/Yen-Ku/2009.08/2009.08.30.m4\_1KW-2-155-F3\_00:39\_C13\_1D.fid

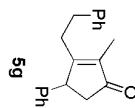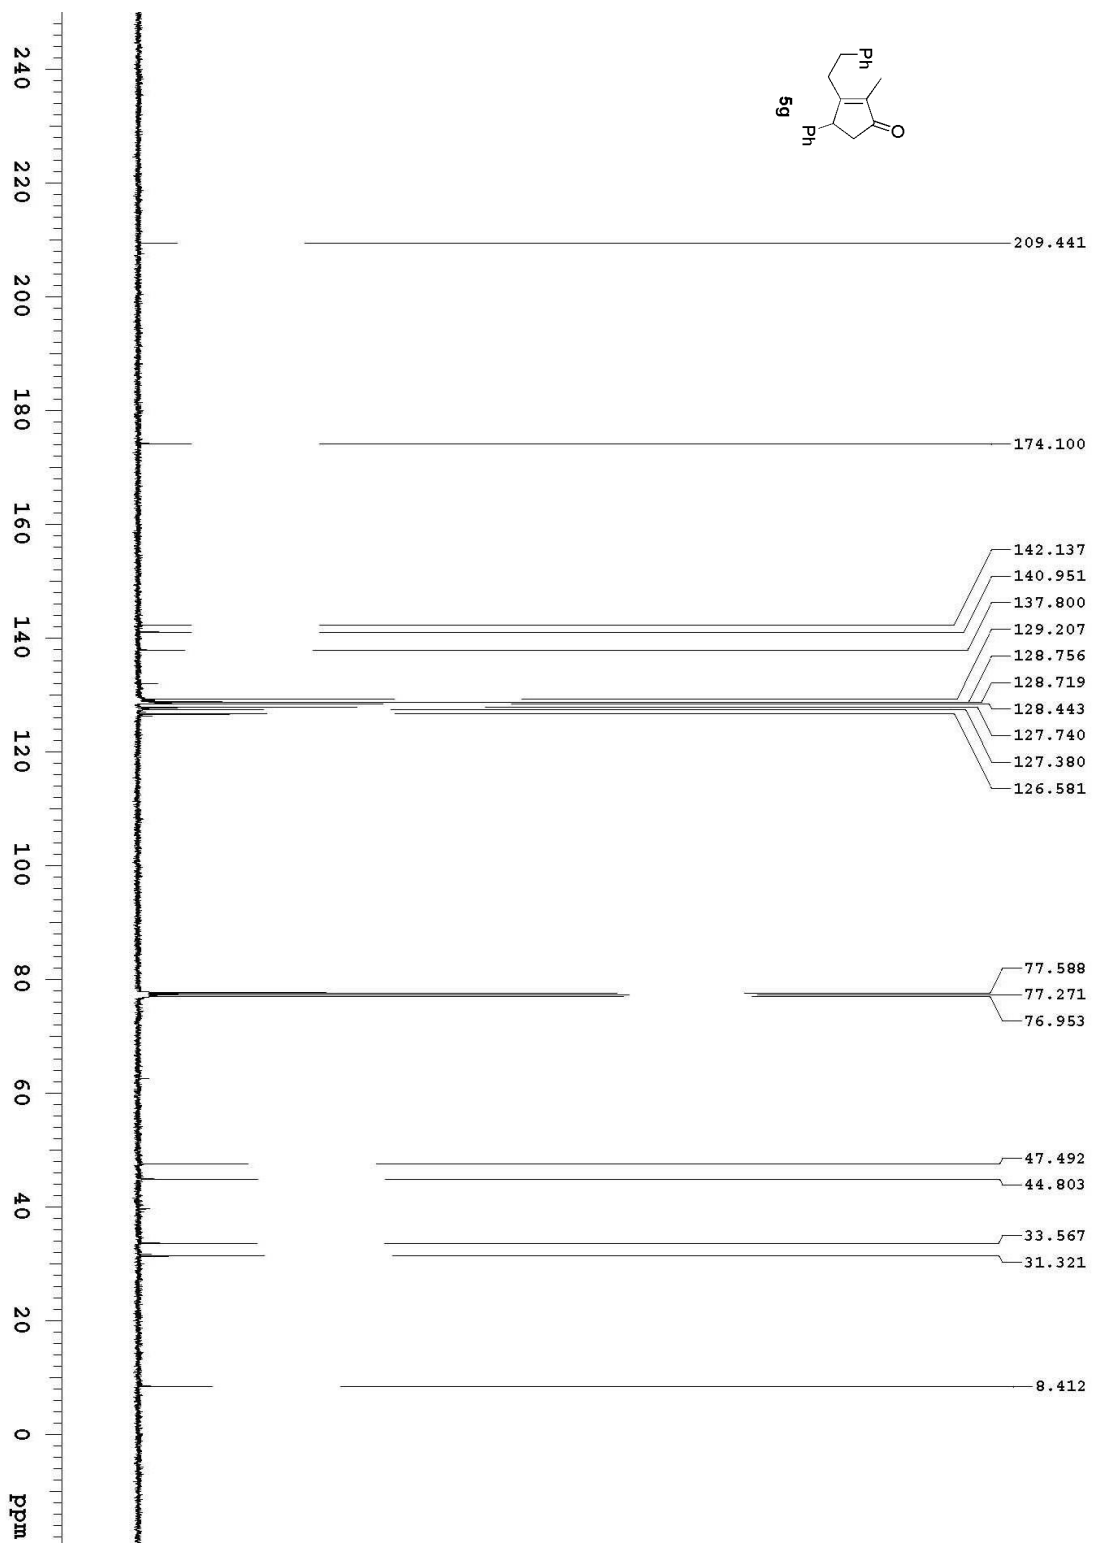

Yen-Ku, YKW-1-155-F2  
 400.393 MHz <sup>1</sup>H ID in cdcl<sub>3</sub> (ref. to CDCl<sub>3</sub> @ 7.26 ppm), temp 27.0 C -> actual temp = 27.0 C, m400gz probe  
 Pulse Sequence: s2pul

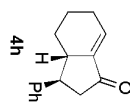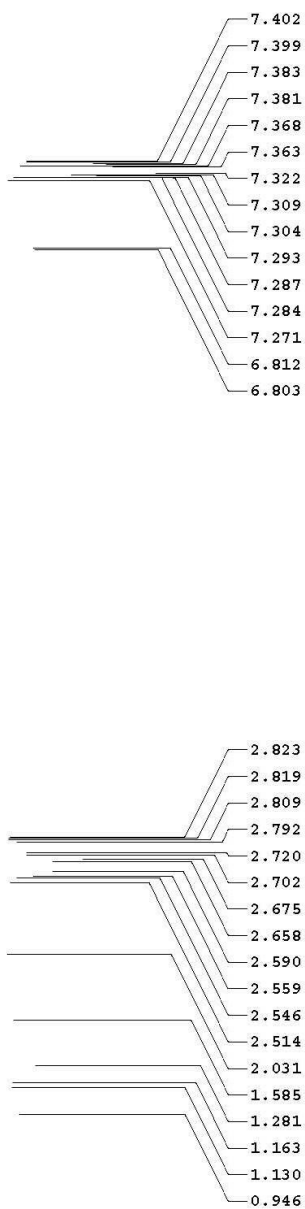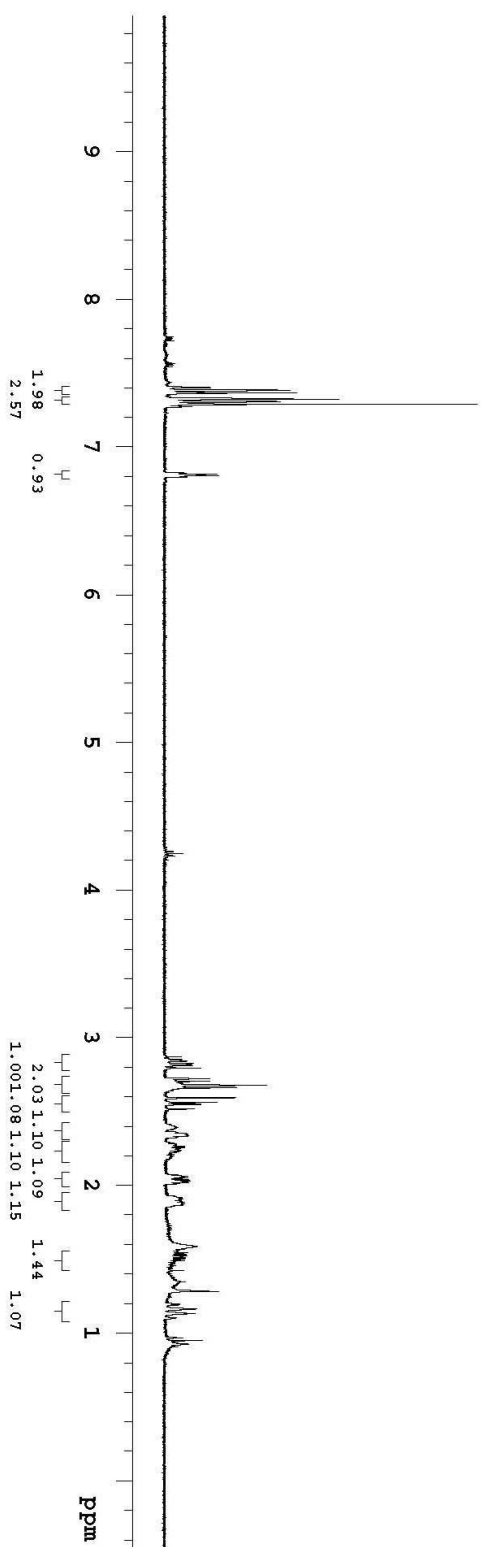

100.690 MHz CDCl<sub>3</sub> [H1] ID in cdcl3 (ref. to CDCl<sub>3</sub> @ 77.06 ppm), temp 27.0 C -> actual temp = 27.0 C, m400gz probe  
 date: Jun 8 2009 sweep width: 27174Hz acq.time: 2.0s relax.time: 0.1s # scans: 512 dig.res.: 0.2 Hz/pt hz/mm: 113.2  
 file: /mnt/d600/home13/westumr/nmrdata/DATA\_FROM\_NMRSERVICE/Yen-Ku/2009.06/2009.06.8.m4\_YKW-1-155-F2\_13:10\_CDCl3\_ID.f1d

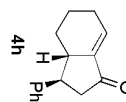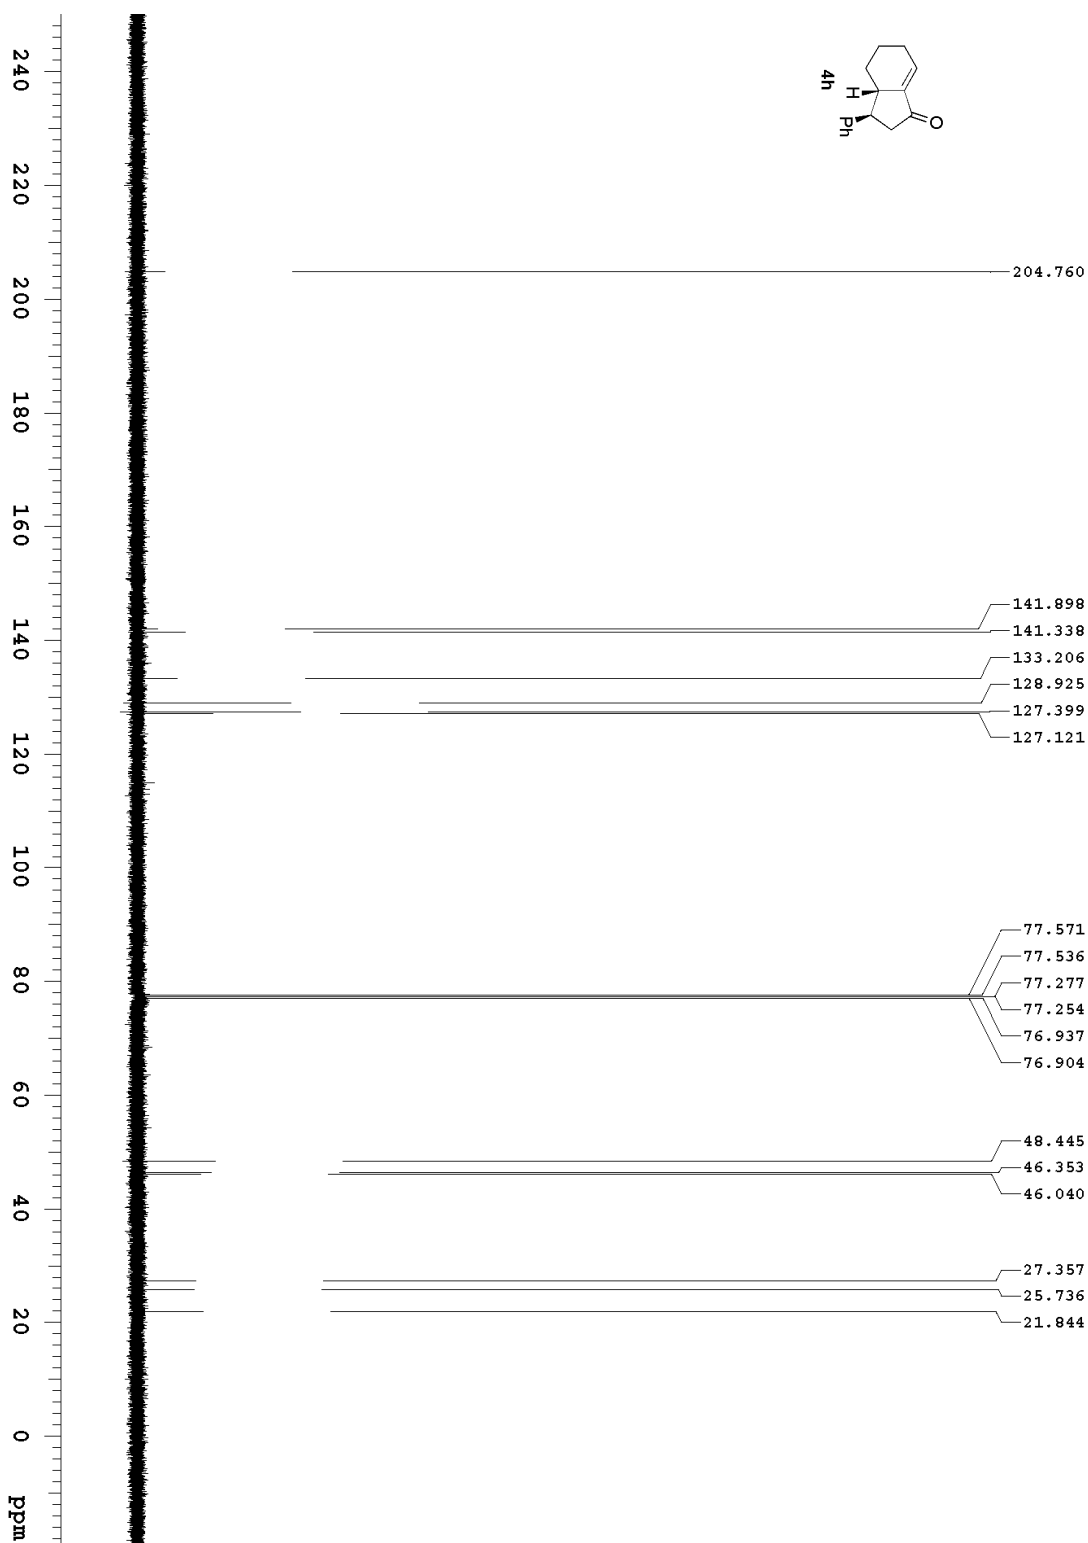

Yen-Ku, YKW-1-155-F3reH  
 400.393 MHz <sup>1</sup>H 1D in cdcl<sub>3</sub> (ref. to CDCl<sub>3</sub> @ 7.26 ppm), temp 27.0 C -> actual temp = 27.0 C, m400gz probe  
 Pulse Sequence: s2pul

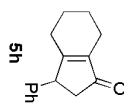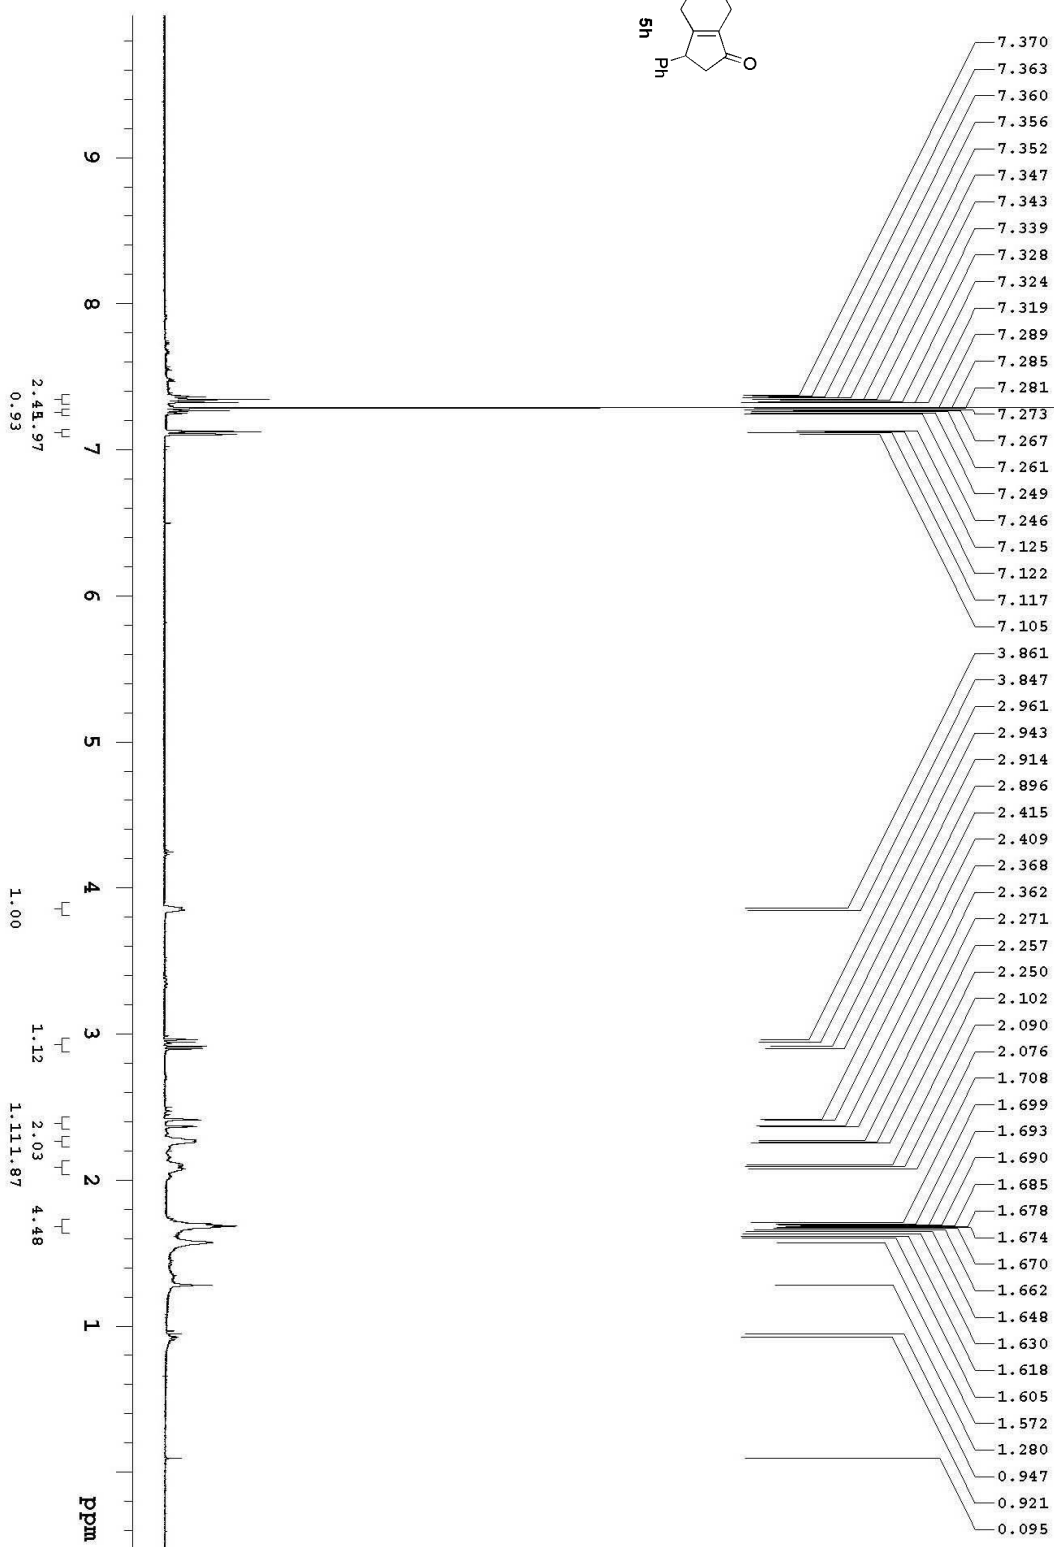

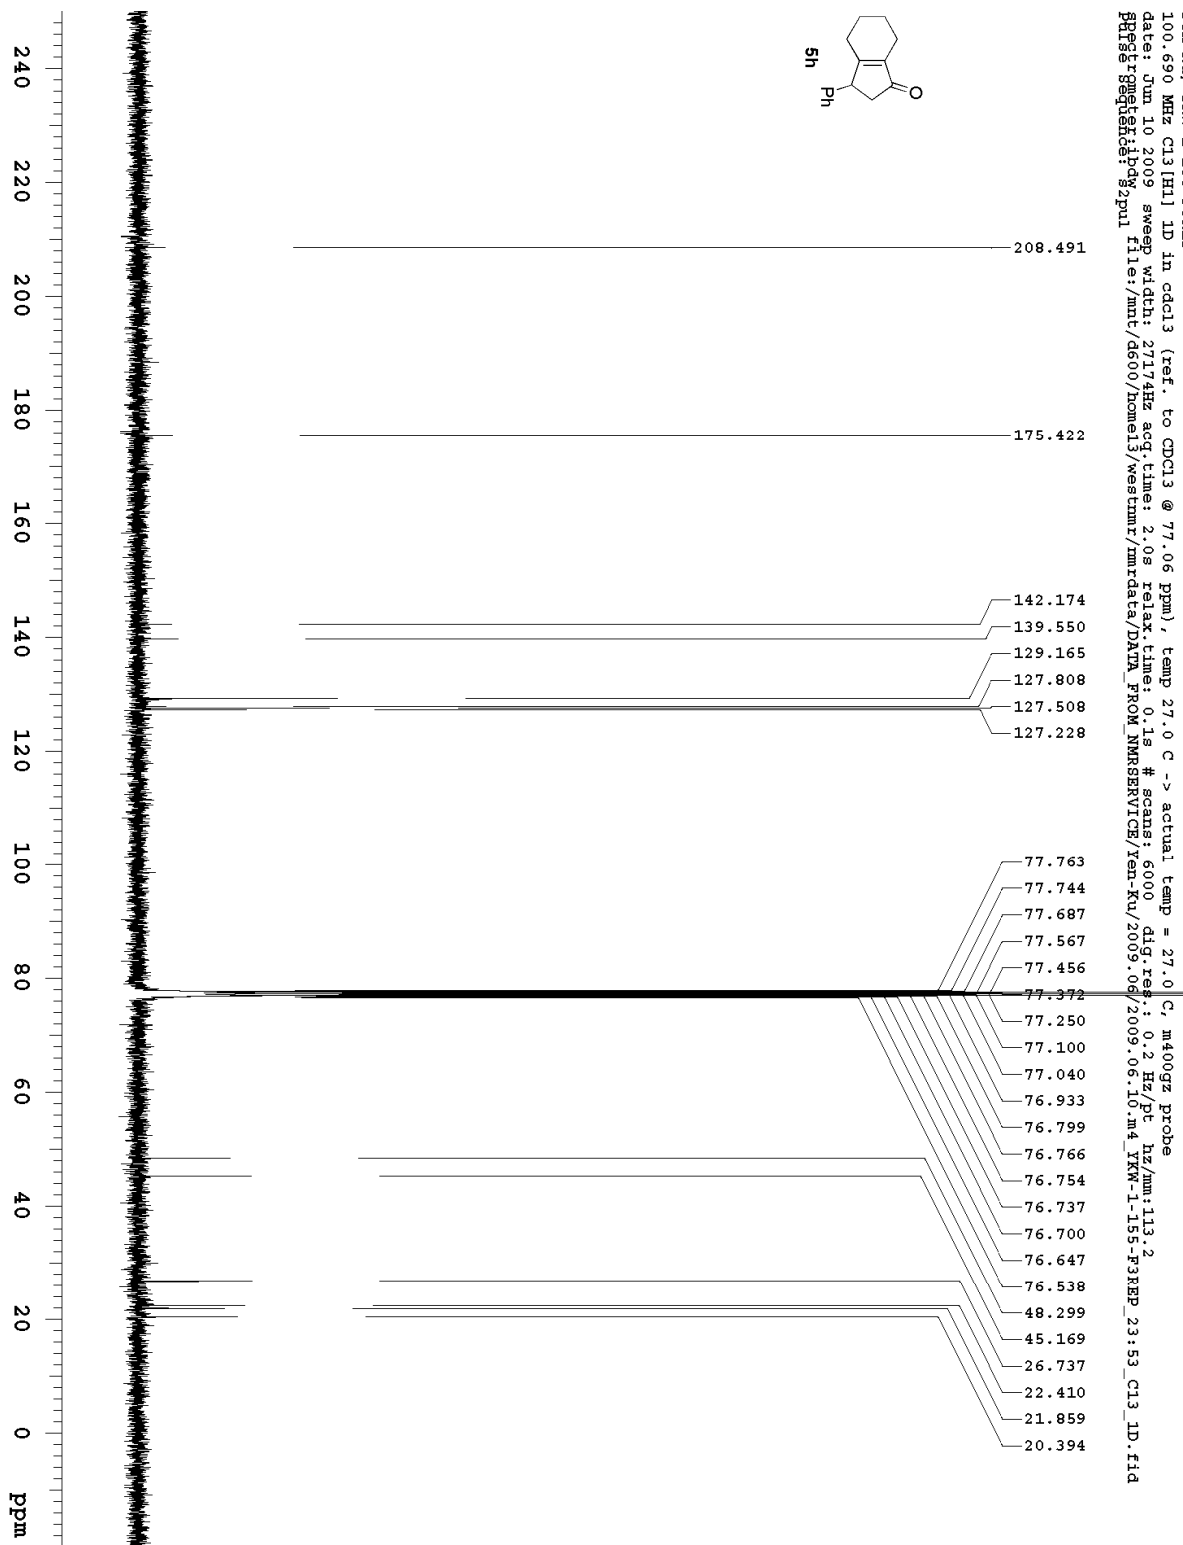

Yen-Ku, YKW-1-197-F2-H1  
 400.393 MHz H1 1D in cdcl3 (ref. to CDCl3 @ 7.26 ppm), temp 27.0 C -> actual temp = 27.0 C, m400gz probe  
 Pulse Sequence: s2pul

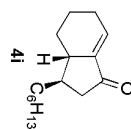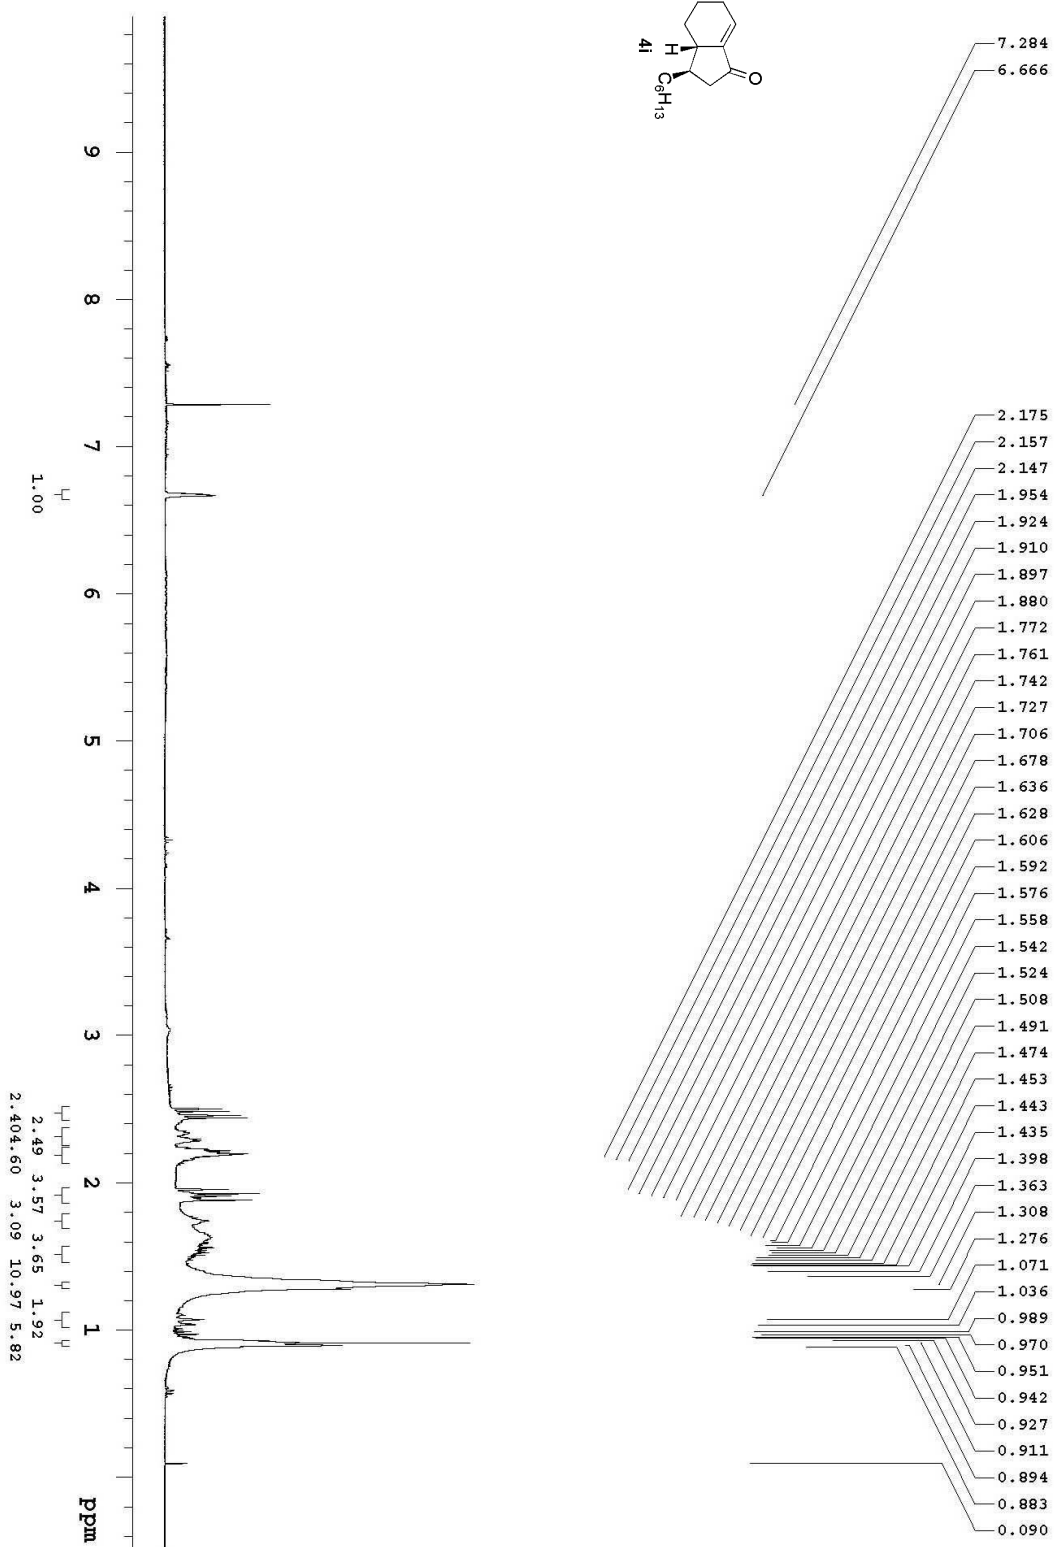

100.690 MHz C13[H1] 1D in cdcl3 (ref. to CDCl3 @ 77.06 ppm), temp 27.0 C -> actual temp = 27.0 C, m400gz probe  
 date: Jun 18 2009 sweep widch: 27174Hz acq time: 2.0s relax time: 0.1s # scans: 1024 dig res.: 0.2 Hz/pt hz/mm: 113.2  
 F1F2F3F4F5F6F7F8F9 file: mnt/d600/home13/westmr/mrdata/DATA\_FROM\_NMRSERVICE/Yen-Ku/2009.06/2009.06.18.m4\_YKM-1-197-P2-M4\_16:00\_C13\_1D.f1d  
 F1F2F3F4F5F6F7F8F9

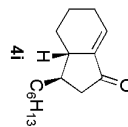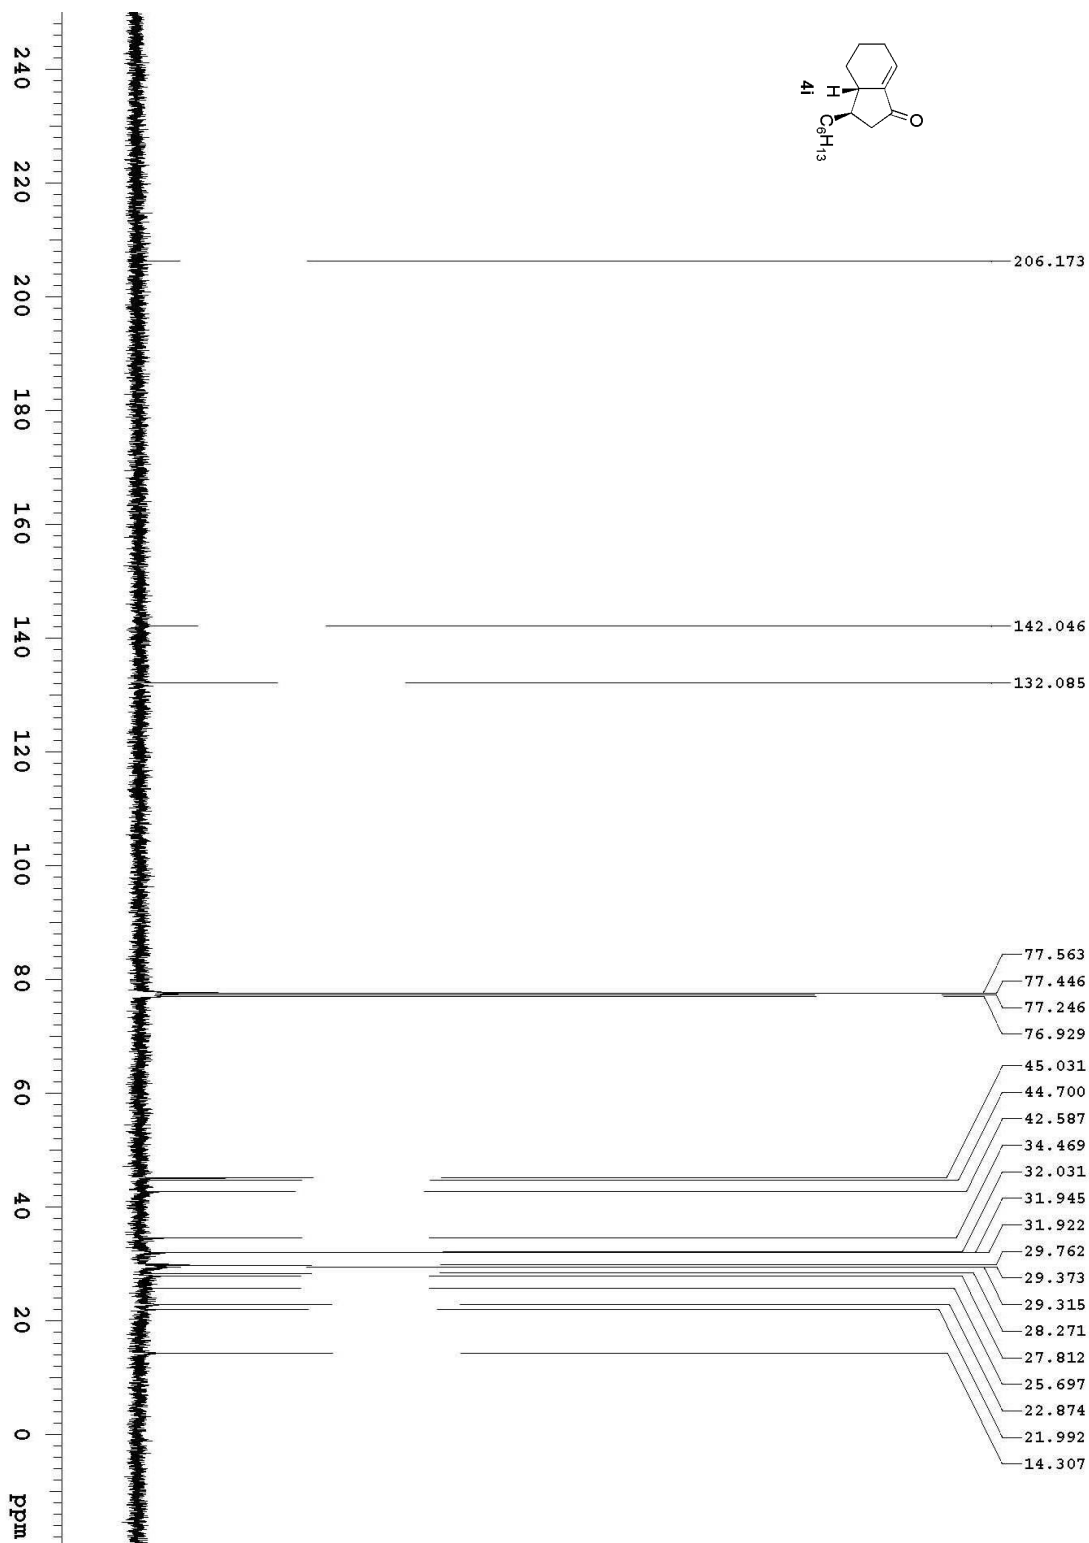



Yen-Ku, YKM-1-197-F3  
 400.393 MHz H1 1D in cdcl3 (ref. to CDCl3 @ 7.26 ppm), temp 27.0 C -> actual temp = 27.0 C, m400gz probe  
 Pulse Sequence: s2pul

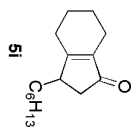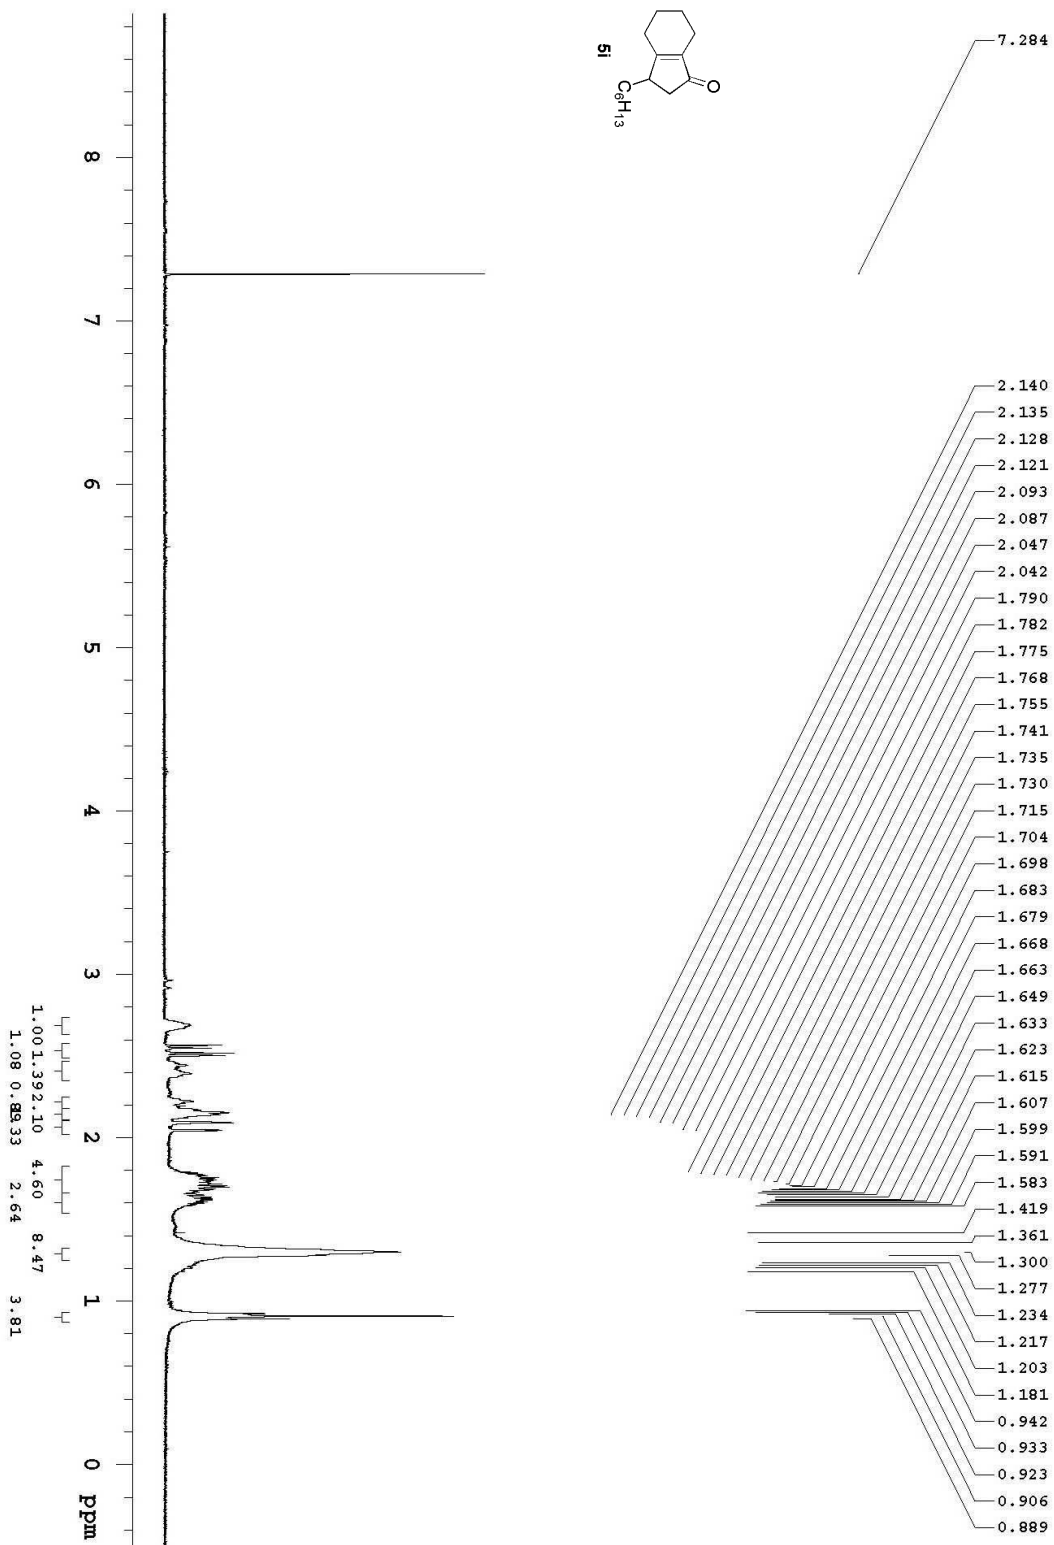

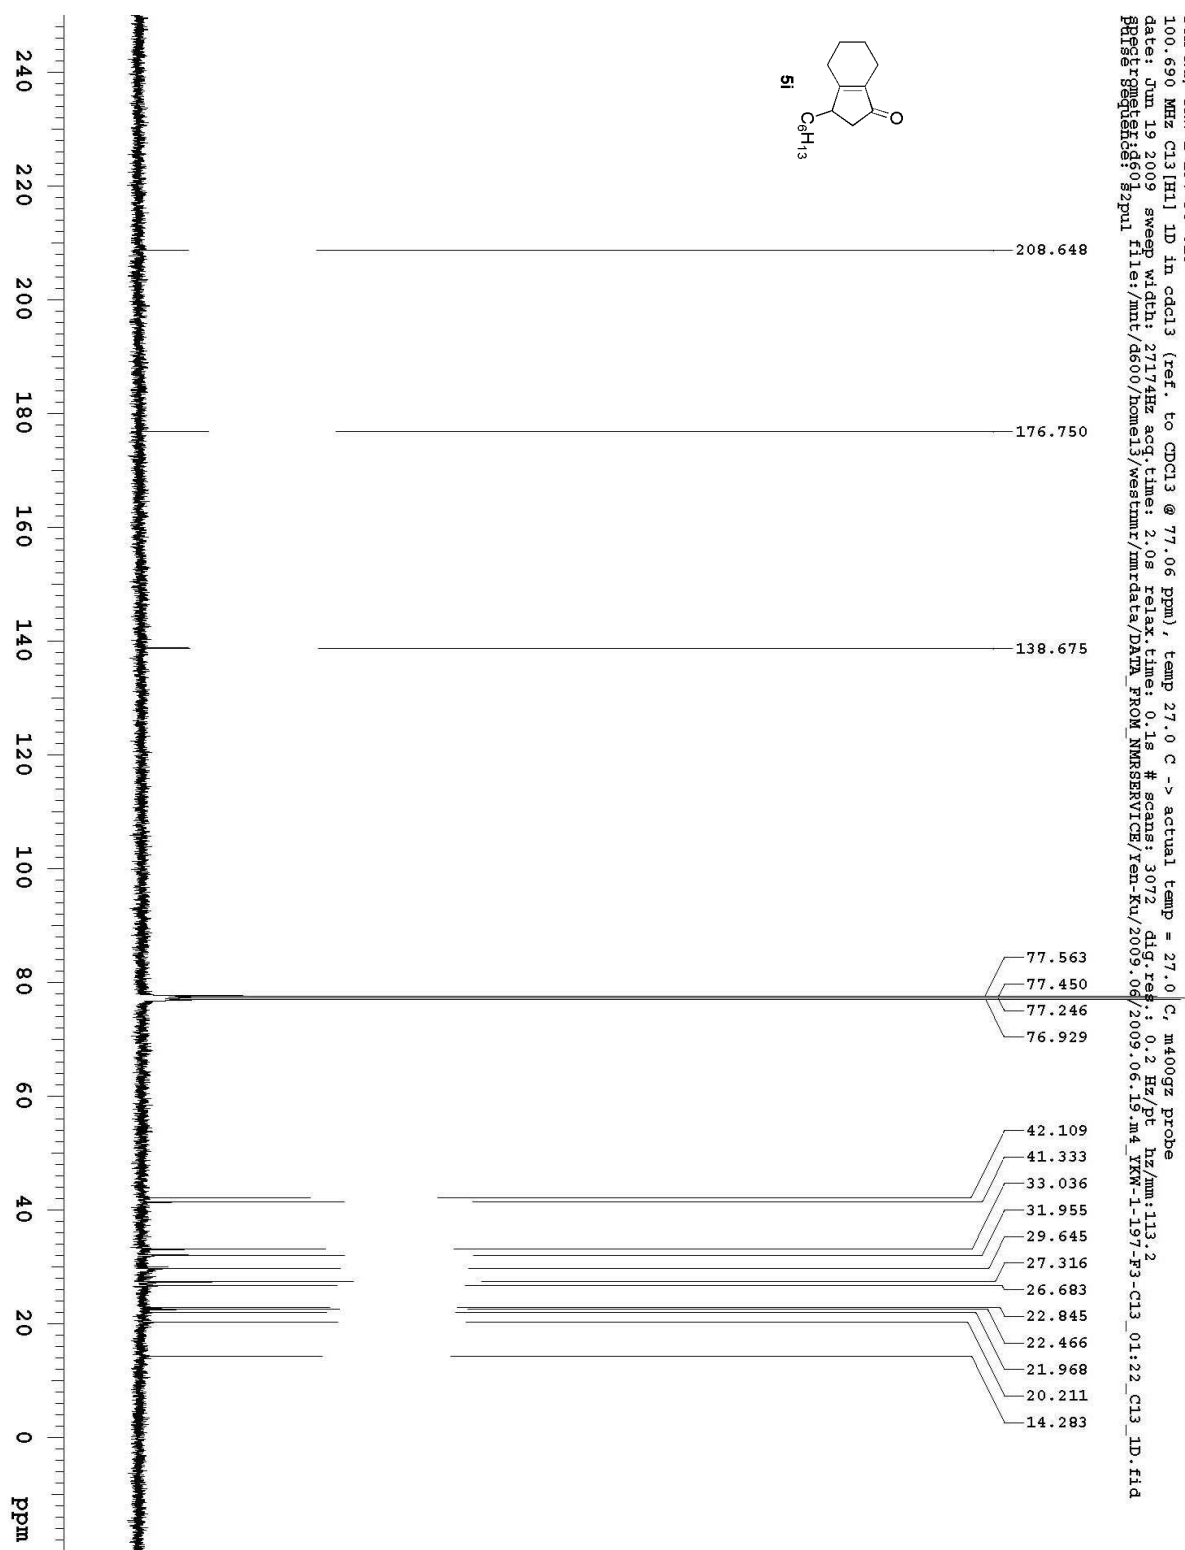

Yen-Ku, YMW-2-191-F2-proton1  
 400.393 MHz H1 1D in cdcl3 (ref. to CDCl3 @ 7.26 ppm), temp 27.0 C -> actual temp = 27.0 C, m400gz probe  
 Pulse Sequence: s2pul

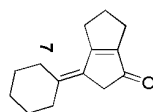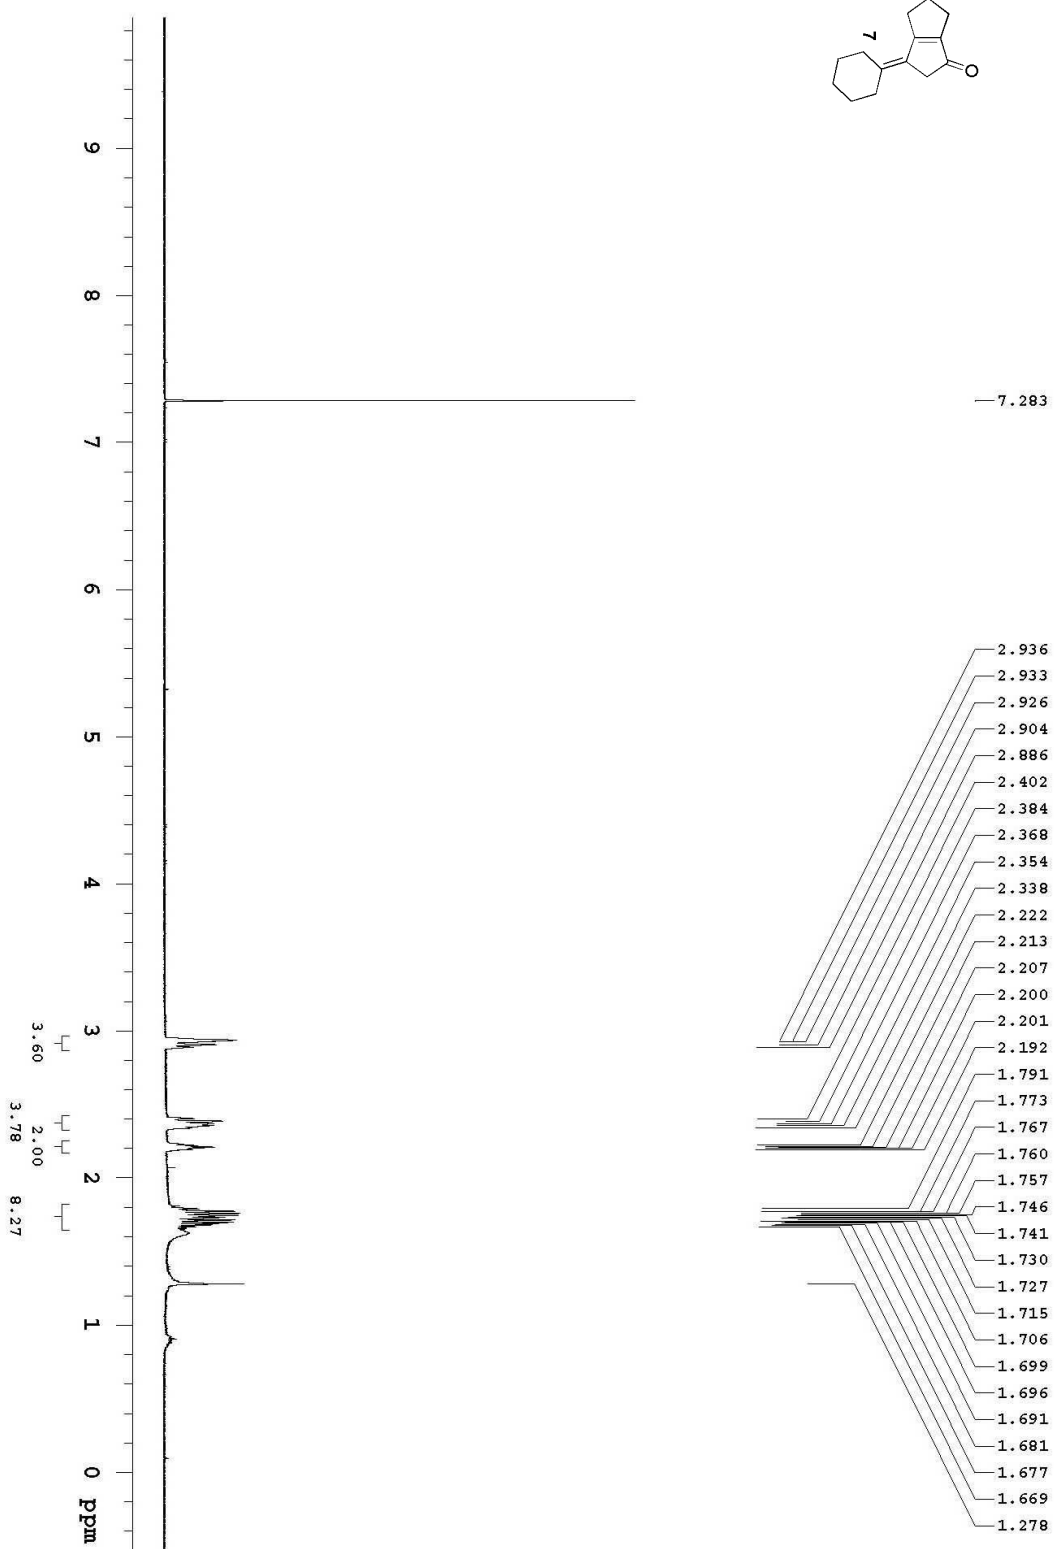

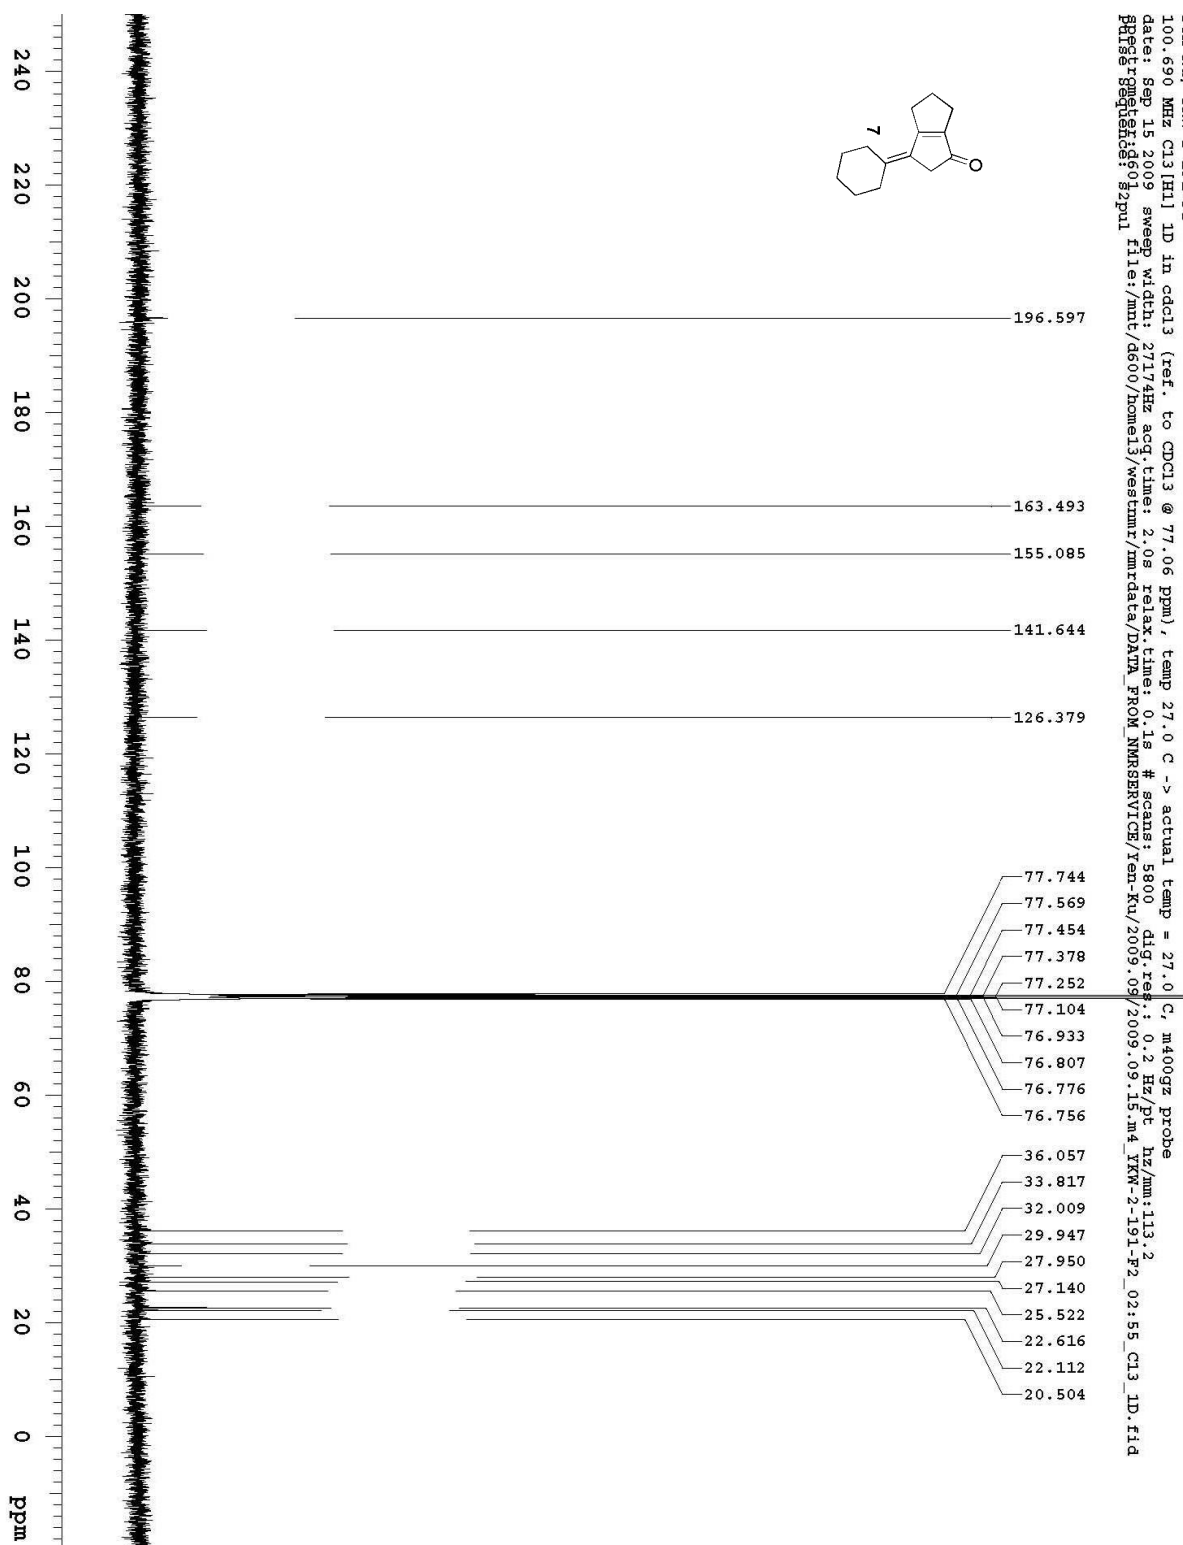

Yen-Ku, YKW-2-191-F1-H  
 400.393 MHz H1 1D in cdcl3 (ref. to CDCl3 @ 7.26 ppm), temp 27.0 C -> actual temp = 27.0 C, m400gx probe  
 Pulse Sequence: szpul

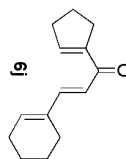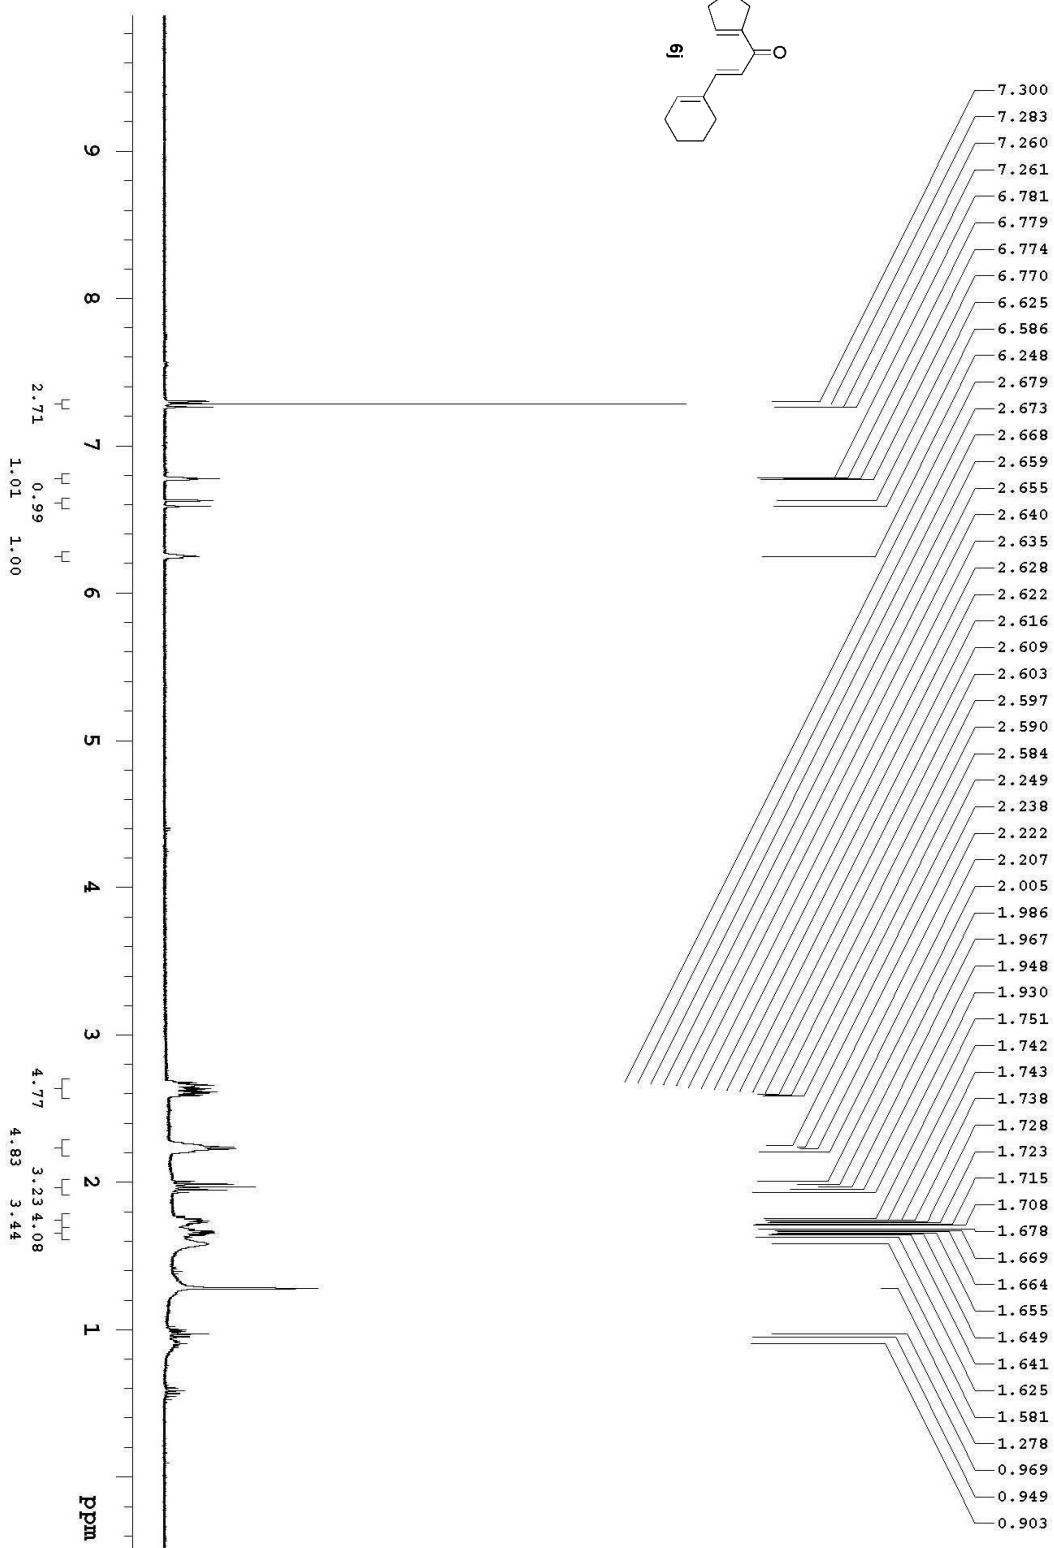

100.630 MHz <sup>13</sup>C{<sup>1</sup>H}] 1D in cdcl<sub>3</sub> (ref. to CDCl<sub>3</sub> @ 77.06 ppm), temp 27.0 C -> actual temp = 27.0 C, m400gz probe  
 date: Sep 15 2009 sweep width: 27174Hz acq.time: 2.0s relax.time: 0.1s # scans: 6000 dig.res.: 0.2 Hz/pt hz/mm: 113.2  
 prog: zgpg30 f2 file: mnt/d600/home13/westmr/fmrdata/DAIa\_FROM\_NMRSERVICE/ten-Ku/2009.09.15.m4\_KW-2-191-F1-C\_18:04\_C13\_1D.fid

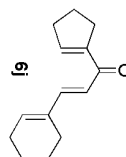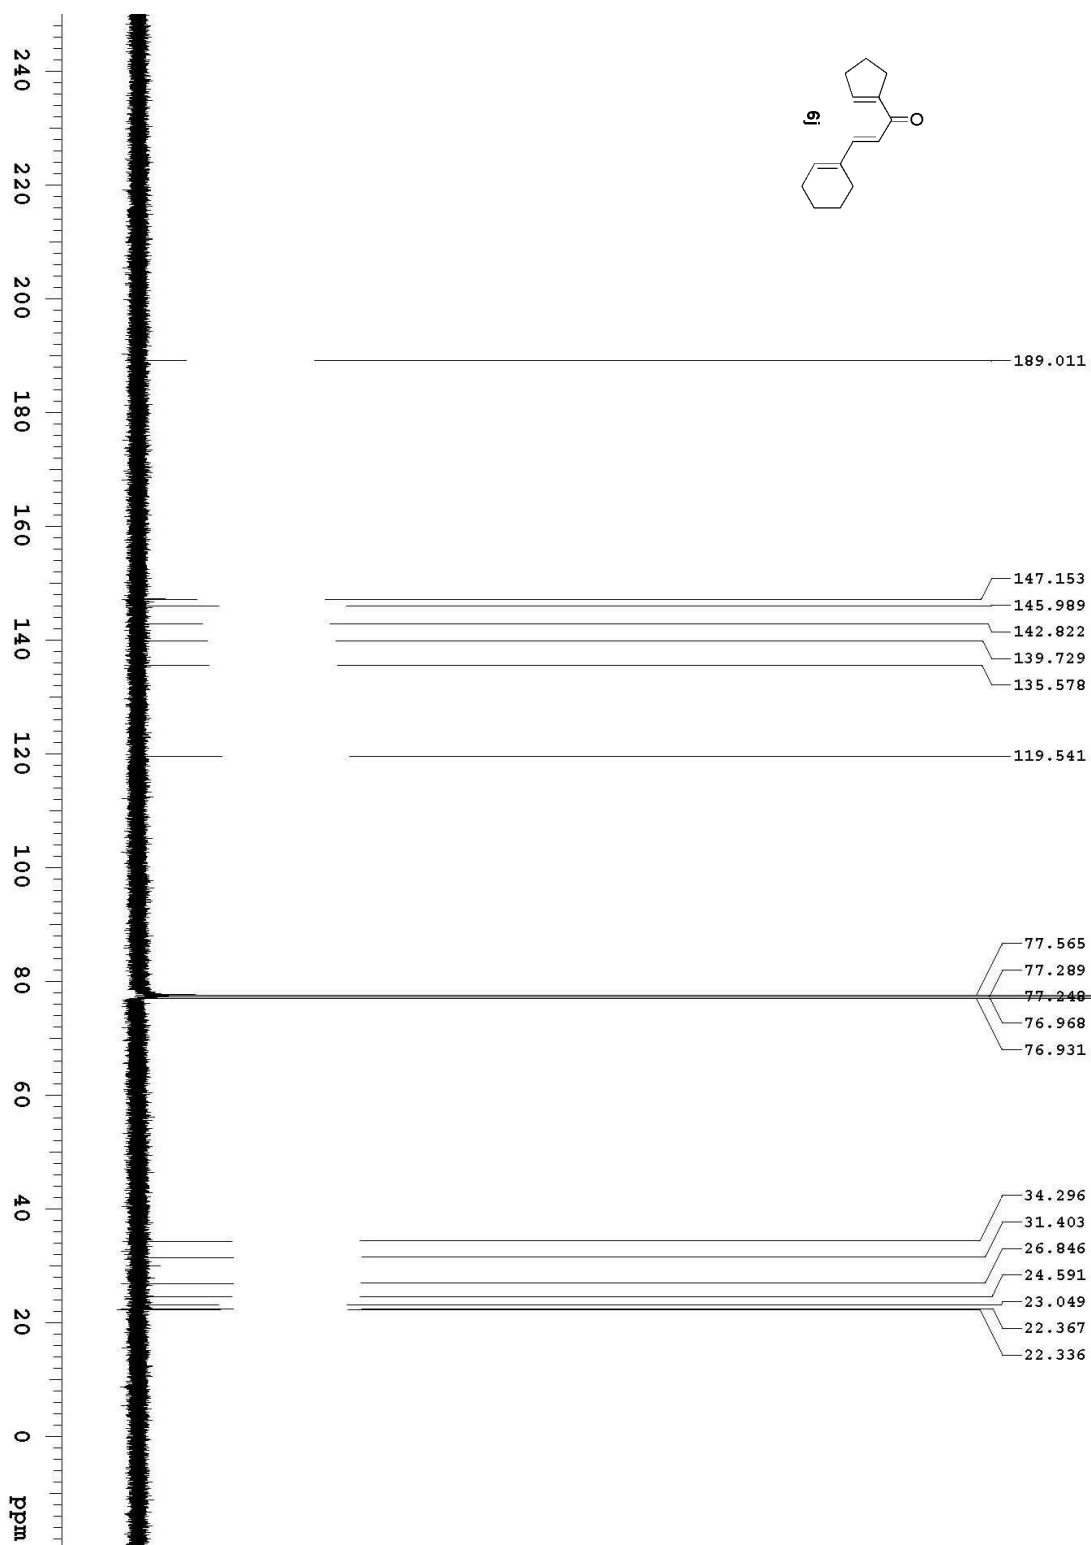

File: 2009.08.28.v7\_YKW-2-145-1\_H1\_ID

File: 2009.08.28.v7\_YKW-2-145-1\_H1\_ID

Pulse Sequence: szpul

(+)-9k

7.400  
7.389  
7.378  
7.312  
7.305  
7.294  
7.275  
6.788  
6.782

2.852  
2.844  
2.834  
2.803  
2.788  
2.777  
2.735  
2.724  
2.709  
2.699  
2.589  
2.571  
2.563  
2.545  
2.441  
2.436  
2.420  
2.414  
2.408  
2.402  
2.266  
2.259  
2.251  
2.244  
2.237  
2.230  
2.211  
2.205  
2.196  
2.191  
2.184  
2.178  
2.163  
2.157  
2.037

2.019  
1.594  
1.550  
1.541  
1.388  
1.351  
1.225  
1.175  
1.093  
1.075  
1.060  
1.042  
0.937

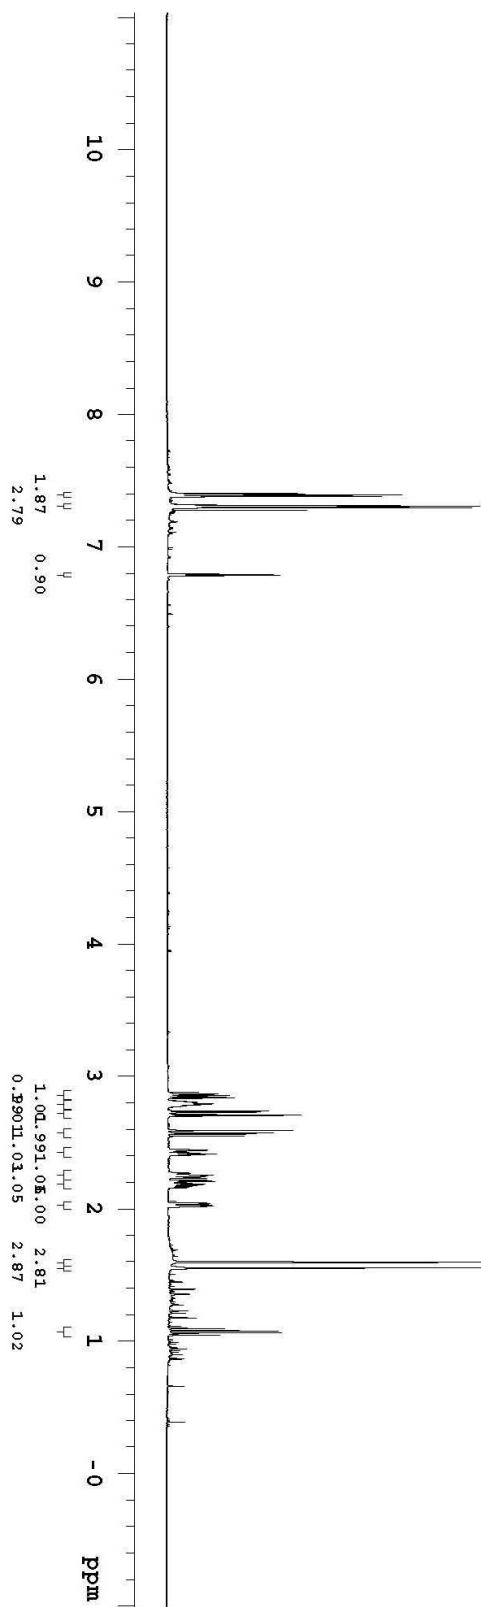

Yen-Ku Wt, YKW-2-145-1  
 175.972 MHz C13 [H1] apt in cdcl3  
 date: Aug 28 2009 sweep width: 48077Hz acq. time: 2.0s relax. time: 0.1s # scans: 20000 dig. res.: 0.4 Hz/pt hz/mm: 196.1  
 file: /mnt/d600/home13/westrmf/nmrdata/Yen-Ku/2009.08/2009.08.31.v7\_YKW-2-145-1\_C13\_apt.fid

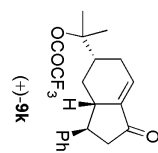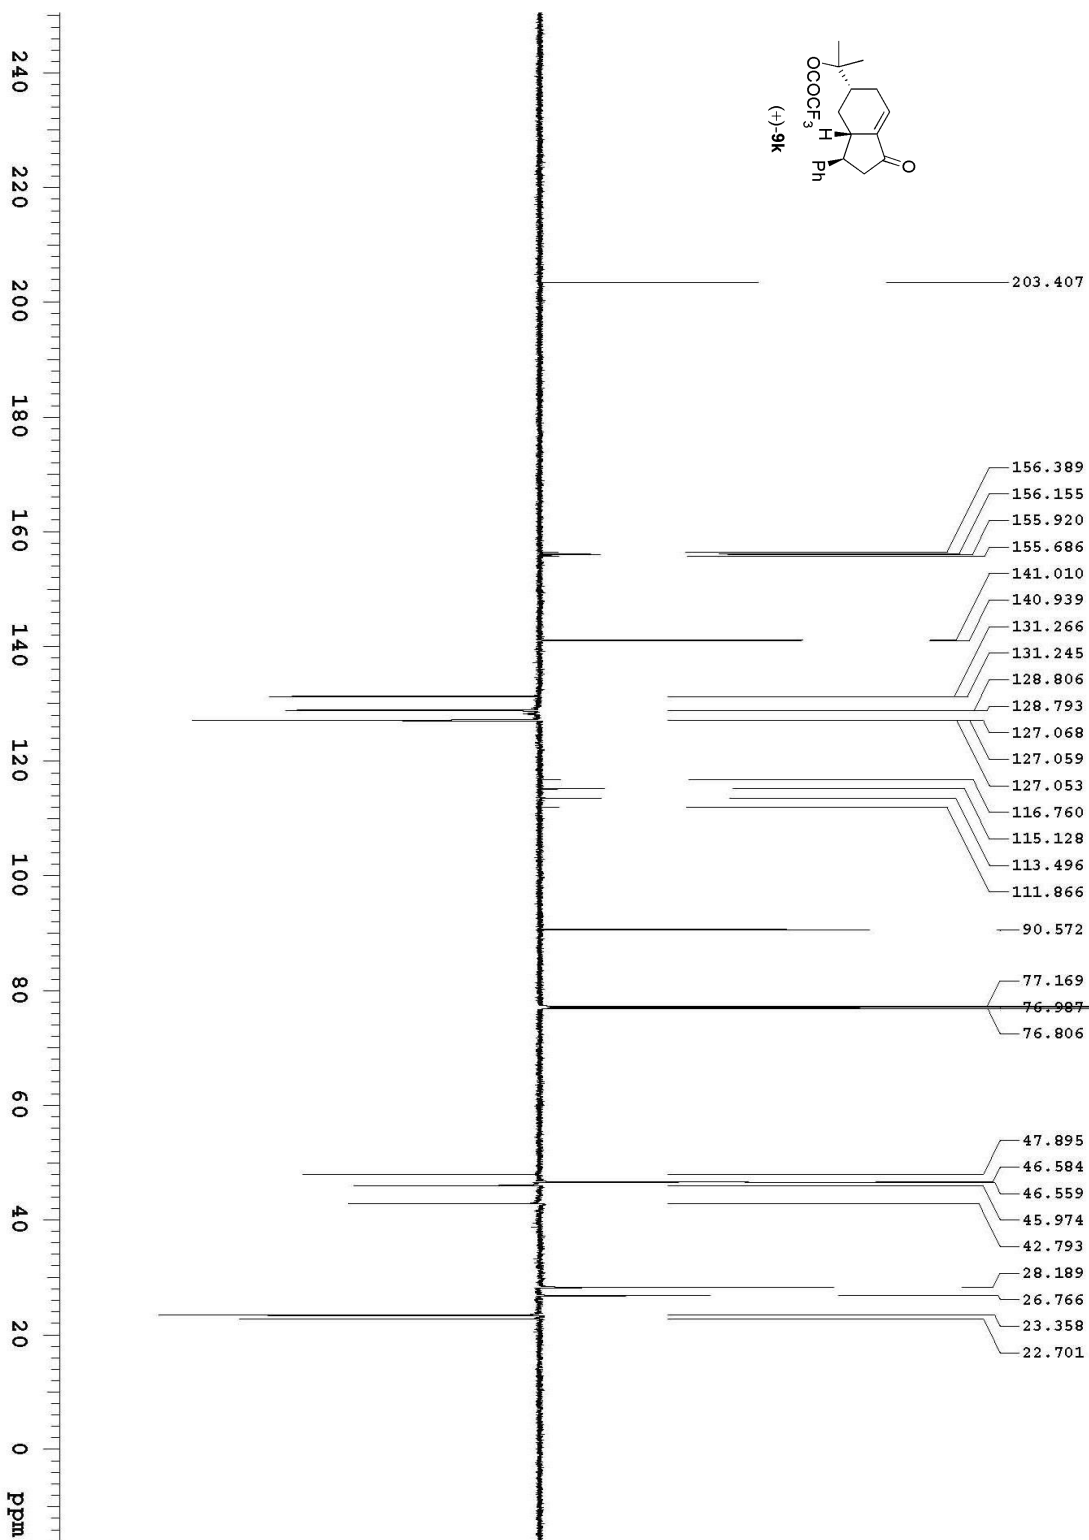



Yen-Ku, YK-2-25-F4  
 400.393 MHz <sup>1</sup>H ID in cdcl<sub>3</sub> (ref. to CDCl<sub>3</sub> @ 7.26 ppm), temp 27.0 C -> actual temp = 27.0 C, m400gx probe  
 Pulse Sequence: szpul1

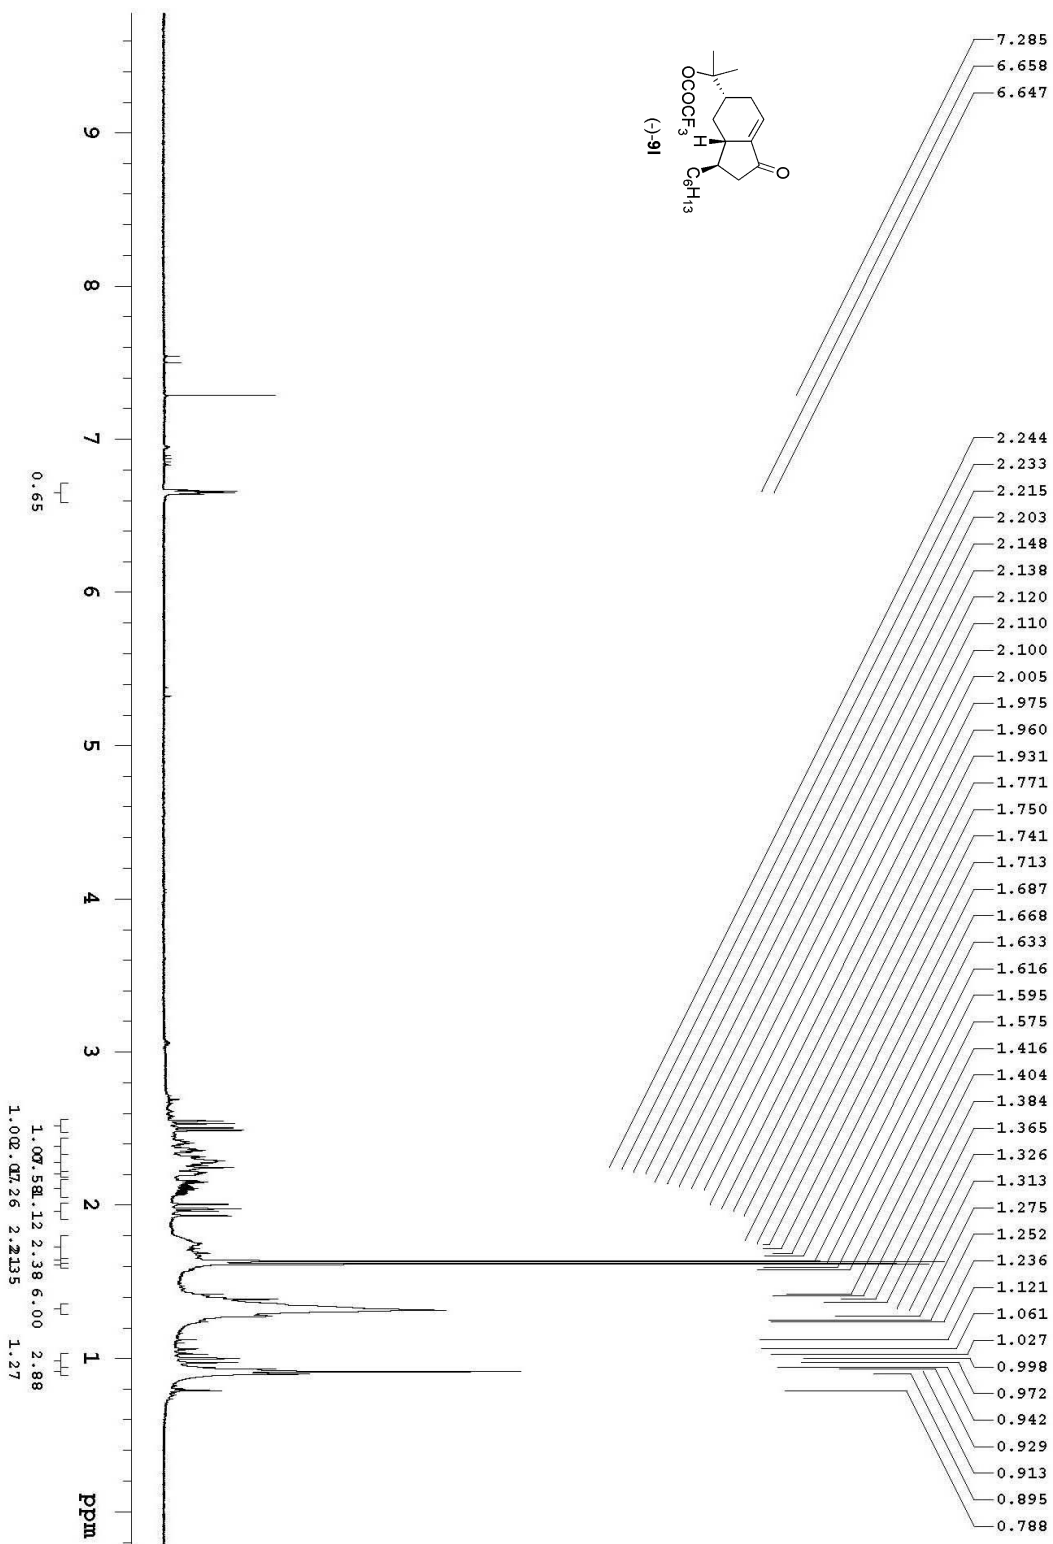

Yen-Ku, YKM-2-25-F4-APT  
 100.690 MHz C13[H1] apt in cdcl3 (ref. to CDCl3 @ 77.06 ppm), temp 27.0 C -> actual temp = 27.0 C, m400gz probe  
 Q4ECH8U4amg, 2009.07.23 23:03:03 apt\_23:03\_C13\_apt.fid  
 File: /mnt/d600/home13/westrum/mrdata/DATA\_FROM\_NMRSERVICE/Yen-Ku/2009.07/2009.07.23\_YKM-2-25-F4-APT\_23:03\_C13\_apt.fid  
 Spectrometer: d601  
 Pulse Sequence: apt

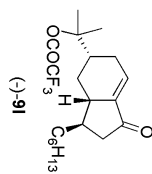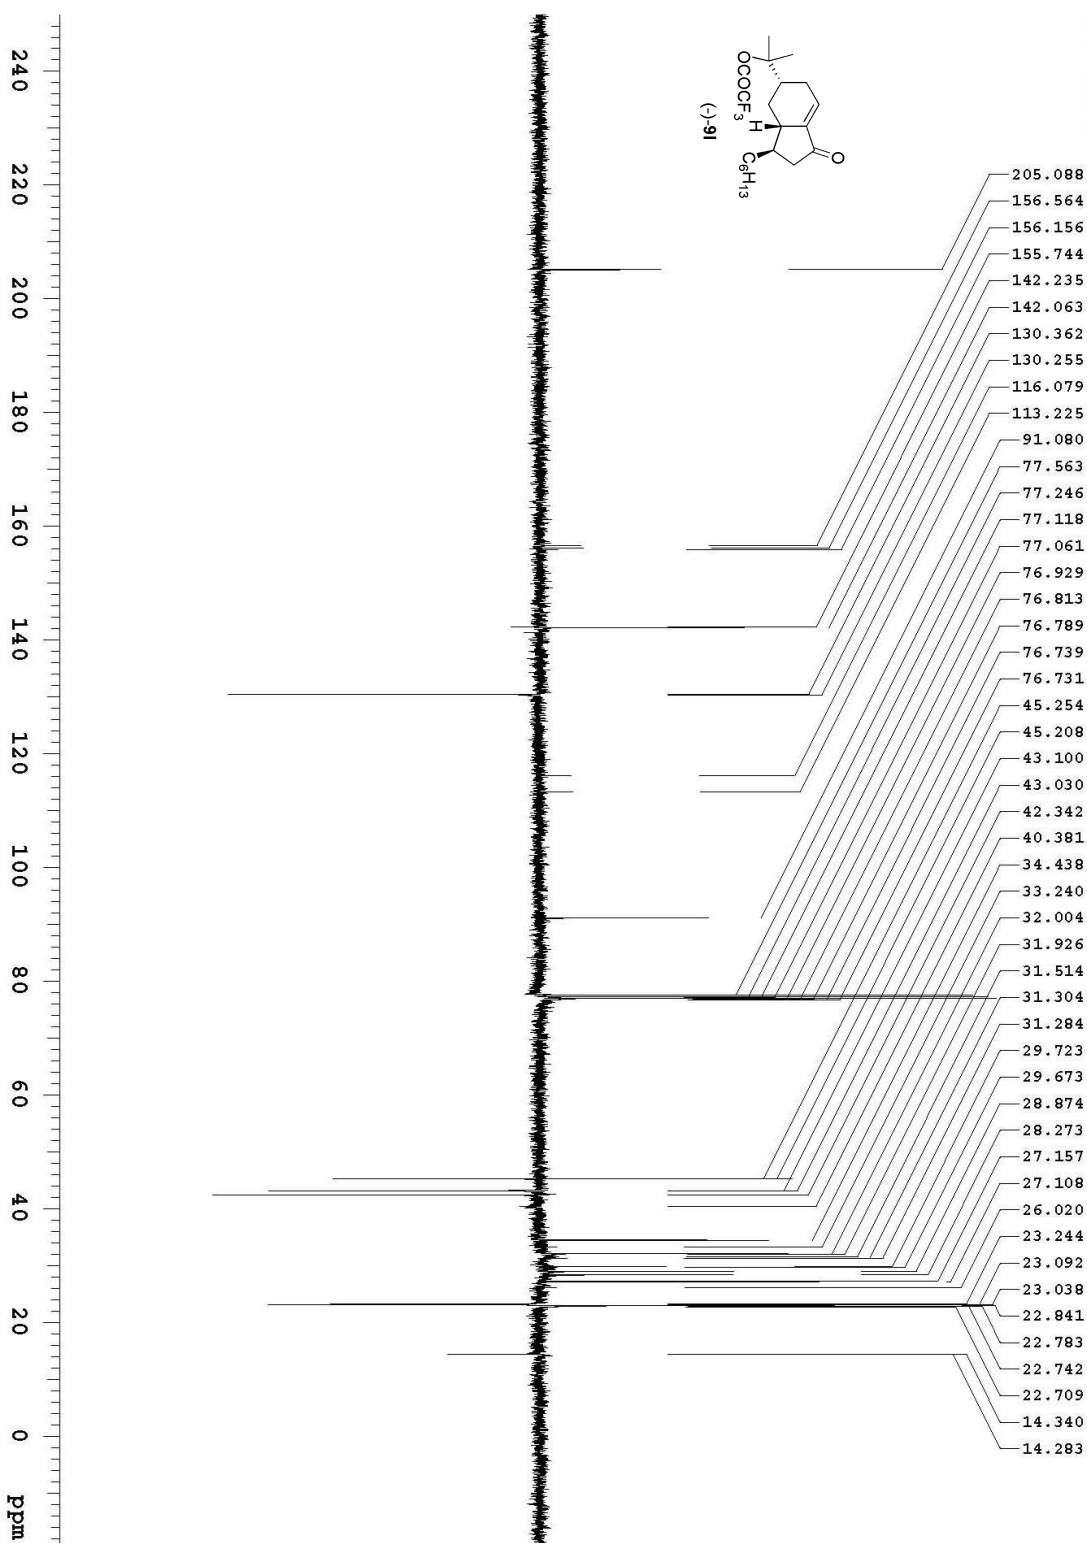

Yen-Ku, YKW-2-17-F3-H1  
 400.393 MHz H1 1D in cdCl3 (ref. to CDCl3 @ 7.26 ppm), temp 27.0 C -> actual temp = 27.0 C, m400gz probe  
 Pulse Sequence: szpul

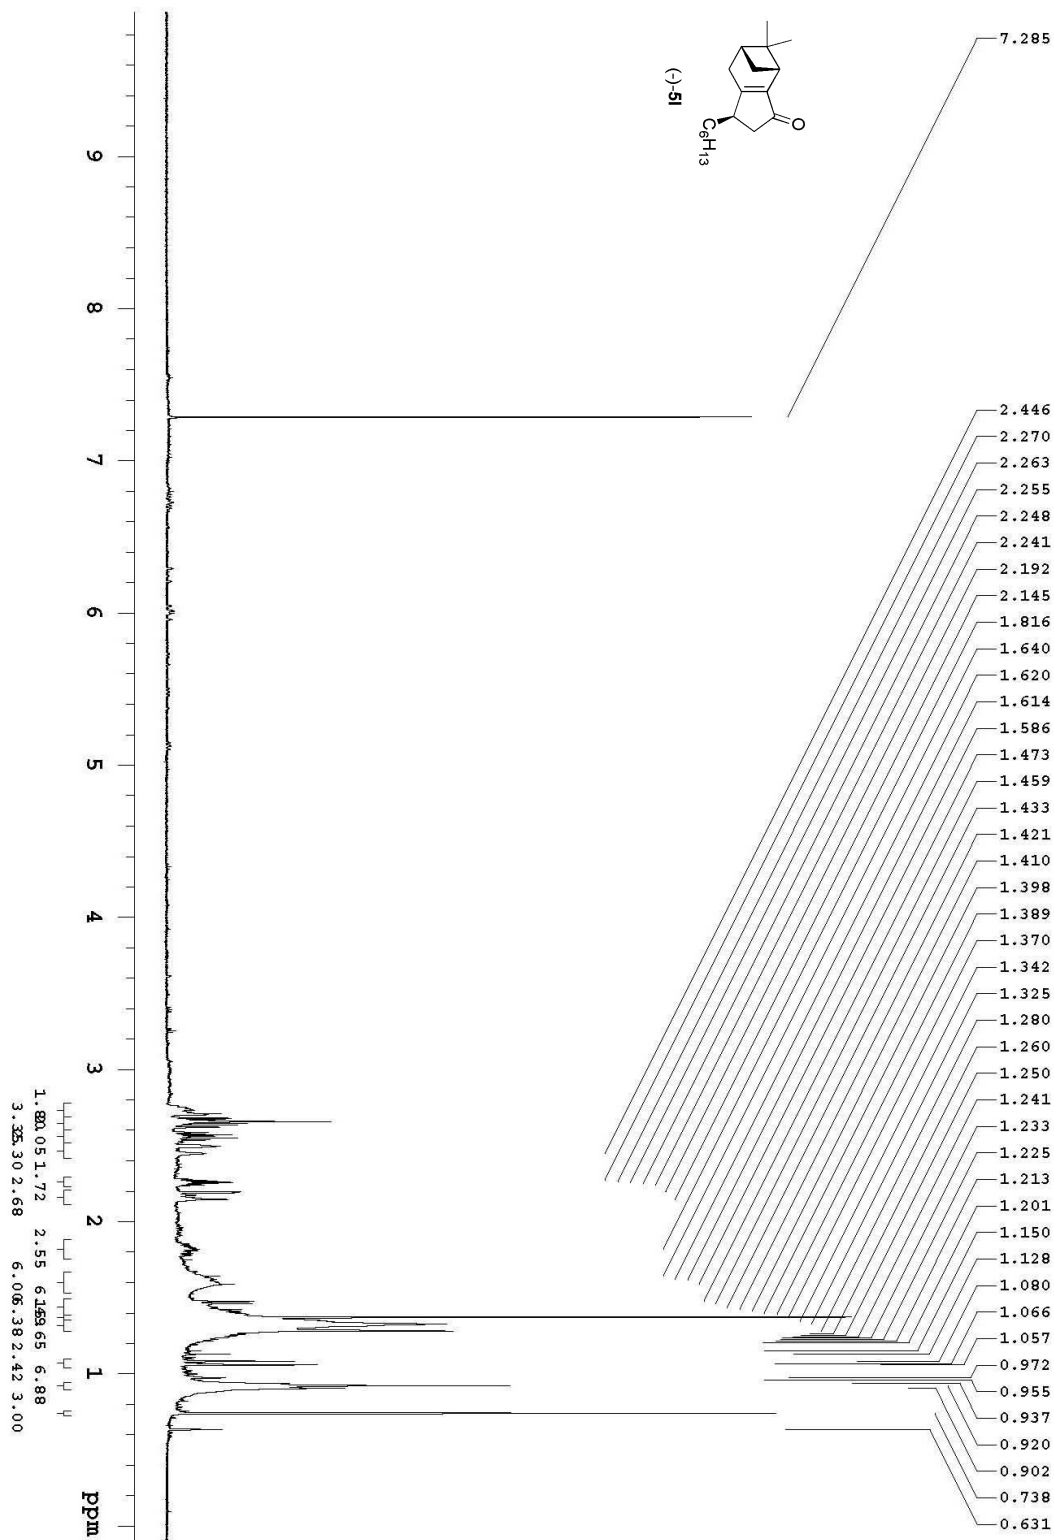

```
Yen-Ku, YKM-2-25-F3-APT
100.690 MHz C13[H1] apt
date: 2016-06-20 09:30:00
spectrometer: d601 f1
Pulse Sequence: apt
```

```

in cdcl3 (ref. to CDCl3 @ 77.06 ppm), temp 27.0 C -> actual temp = 27.0 C, m400gz probe
500MHz, 220.64Hz, 99.96%  

# scans: 5800  dir.res: 0.4 Hz/pt  hz/mm: 113.2  

rel1/mmc/d600/home1/mestime/ten-ku/2009.07/2009.07.6.m4_YKM-2-25-F3-AP1_02:33_C13.ap1.fid

```

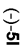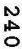

YMW-1-65-exo-redn  
 399.794 MHz H1 1D in cdcl3 (ref. to CDCl3 @ 7.26 ppm), temp 26.5 C -> actual temp = 27.0 C, autograd probe  
 Pulse sequence: szpul

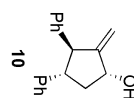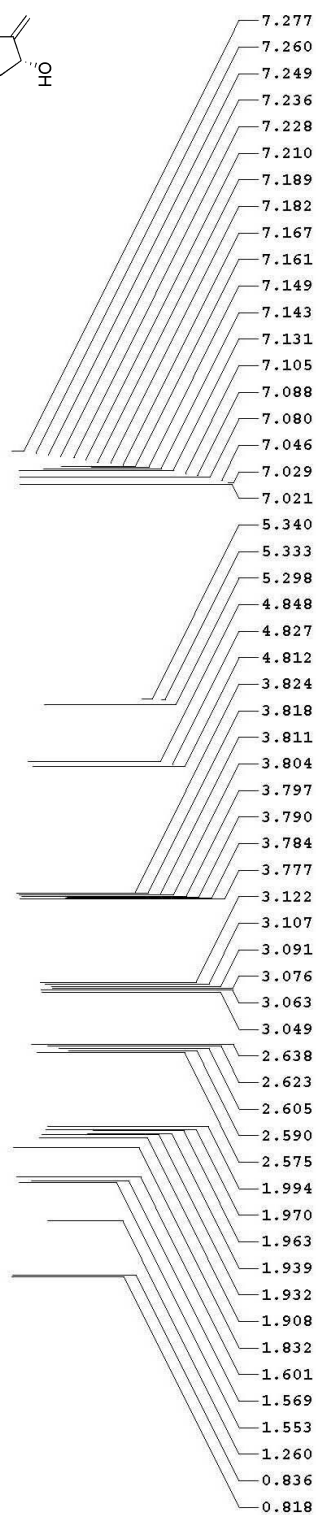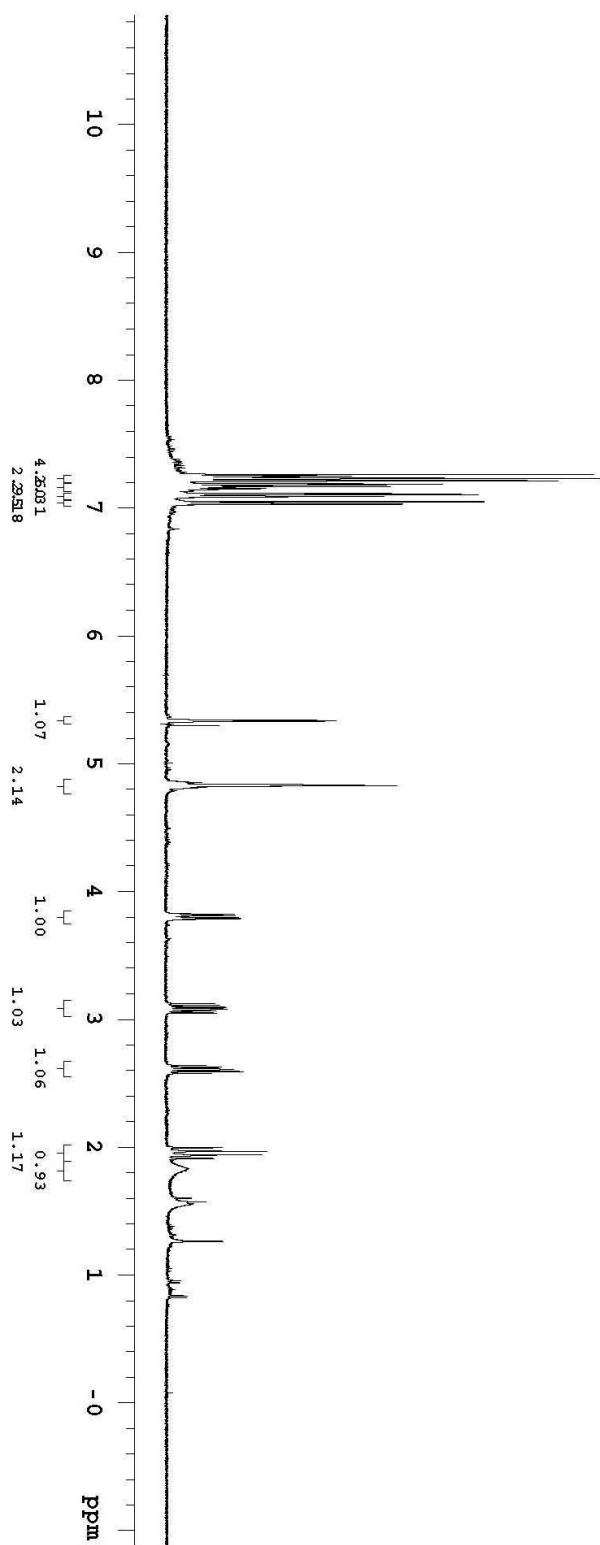



Yen-Ku, YKN-3-73-m4  
 400.393 MHz <sup>1</sup>H ID in cdcl3 (ref. to CDCl3 @ 7.26 ppm), temp 27.0 C -> actual temp = 27.0 C, m400gz probe  
 Pulse Sequence: s2pul1

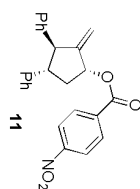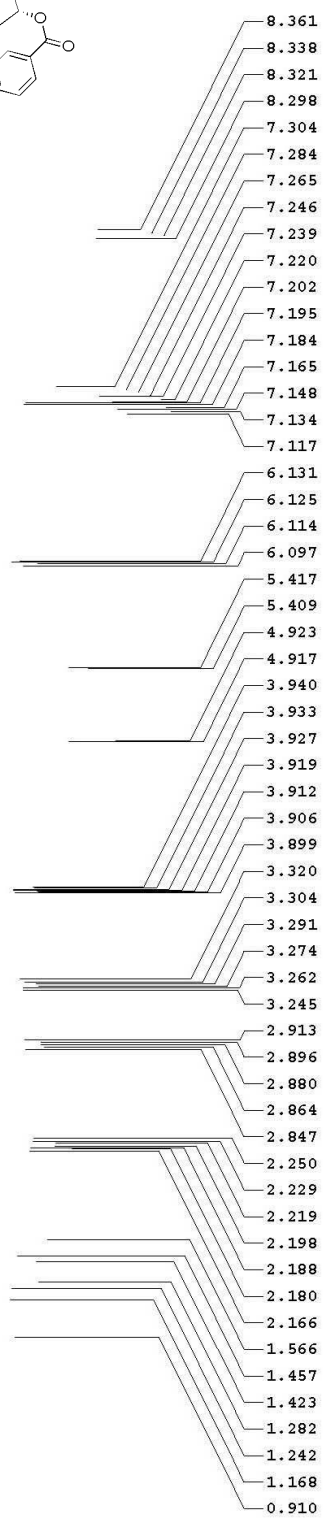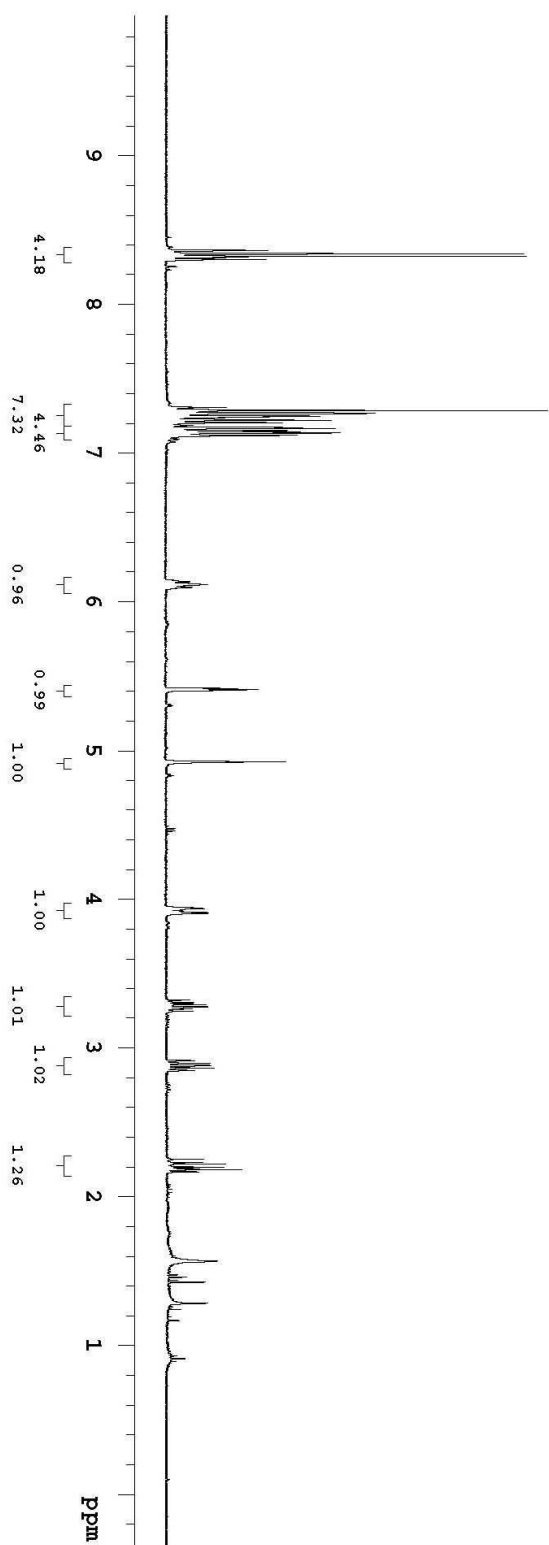

100.690 MHz C13[H1] 1D in cdcl3 (ref. to CDCl3 @ 77.06 ppm), temp 27.0 C -> actual temp = 27.0 C, m400gz probe  
 date: Oct 27 2009 sweep width: 27174Hz acq time: 2.0s # scans: 5800 dig. res.: 0.2 Hz/pt hz/mm: 113.2  
 File: 20091027\_100690\_1d2p11 file: mnt/d600/home13/westlmr/mondata/DATA\_FROM\_NMRSERVICE/Yen-Ku/2009.10/2009.10.27.m4\_YK-3-73-m4\_23:08\_C13\_1D.fid

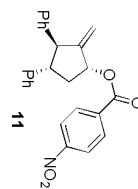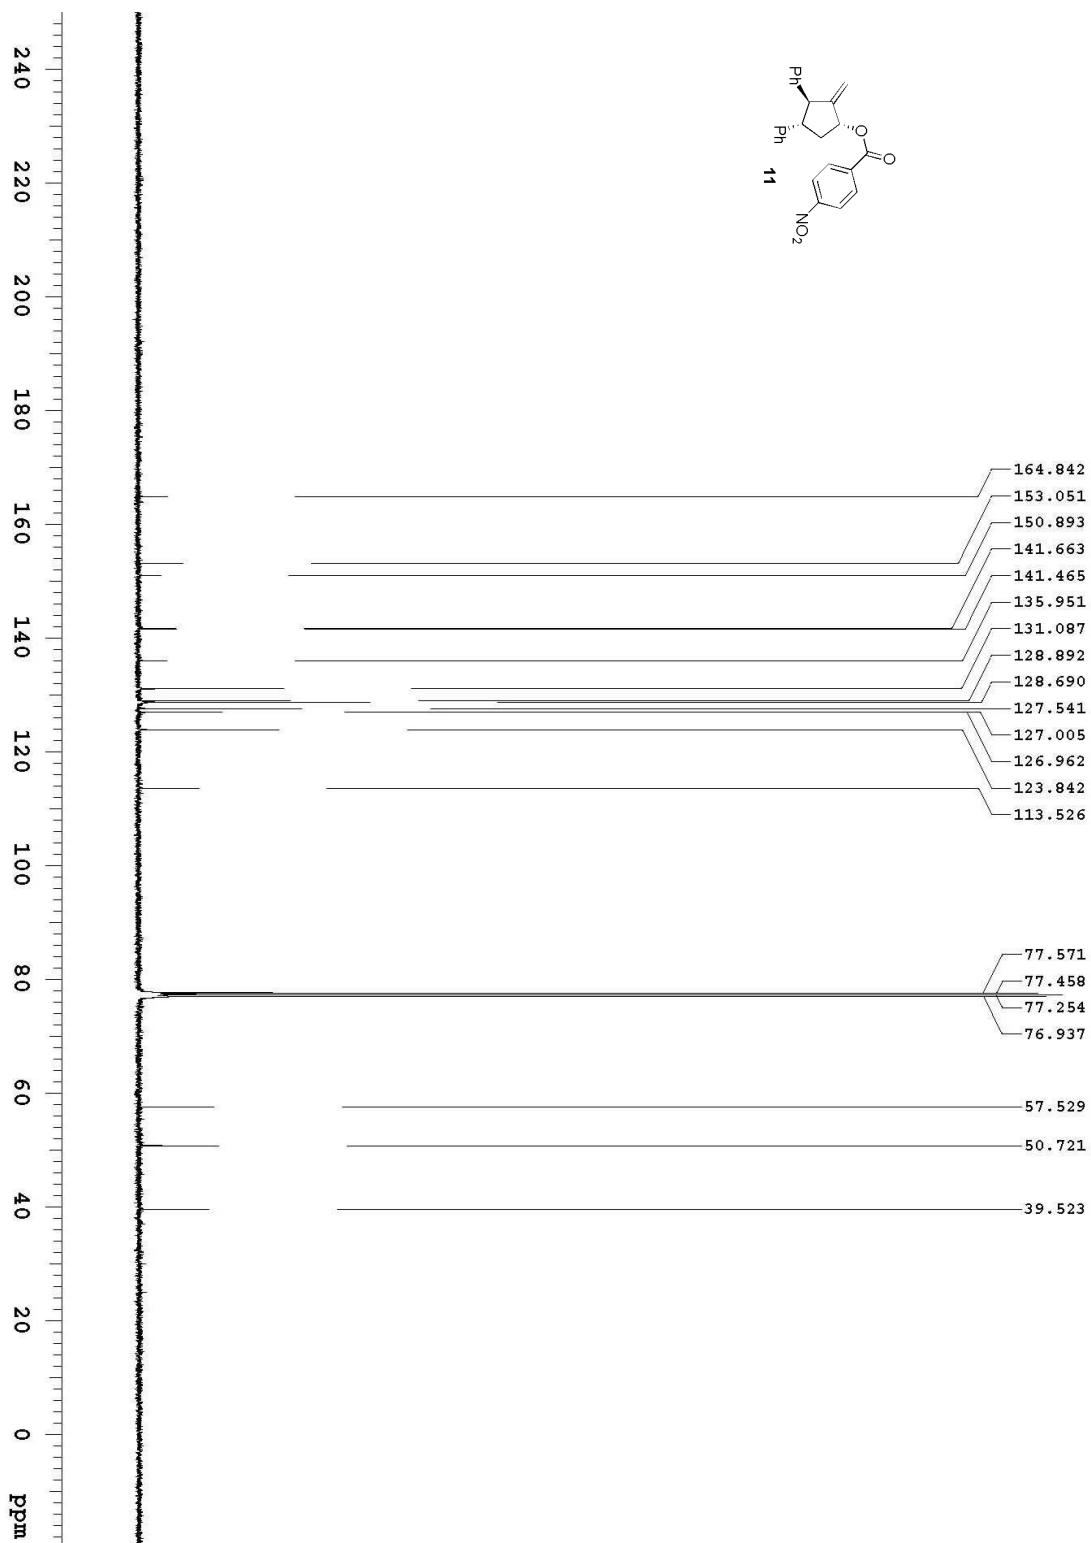

Supplement: Supplementary file 1 [file 4423561]
